# Supplementary material for: CRISPR–Cas9-based functional interrogation of unconventional translatome reveals human cancer dependency on cryptic non-canonical open reading frames
Source: Springer Nature journal article supplement (doi:10.1038/s41594-023-01117-1), 2023-11-06

Full unedited gel for Figure 6b

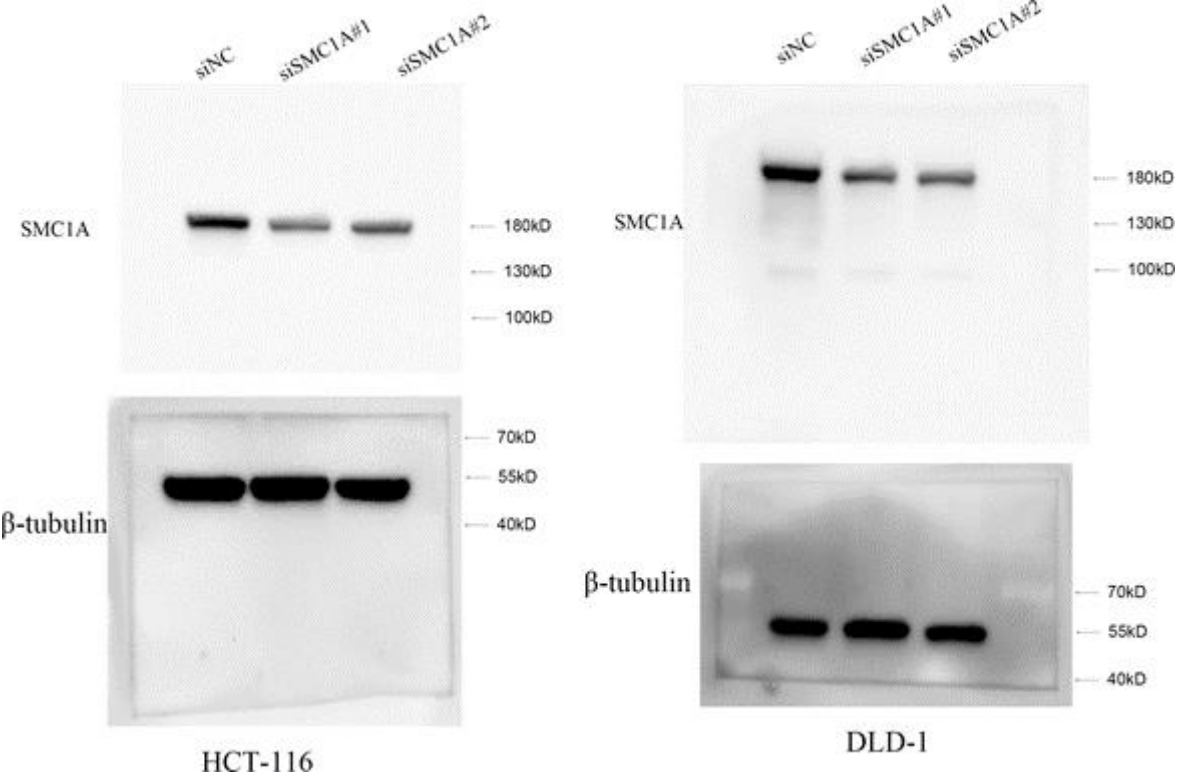

Supplement: MOESM11 [file 41594_2023_1117_MOESM11_ESM-1.pdf]
