# Supplementary material for: CRISPR–Cas9-based functional interrogation of unconventional translatome reveals human cancer dependency on cryptic non-canonical open reading frames
Source: Nat Struct Mol Biol. 2023 Nov 6;30(12):1878–92. doi: 10.1038/s41594-023-01117-1 (PMC10716047; doi:10.1038/s41594-023-01117-1)
Supplement: Supplementary file 4 — Statistical source data. [file 41594_2023_1117_MOESM4_ESM.xlsx]

## Sheet: Figure 2
Figure 2d
days	ORF-ELFN1-AS1			ORF-AC01233.4			EV
0	0.164	0.165	0.169	0.169	0.171	0.16	0.201	0.207	0.202
1	0.266	0.26	0.237	0.253	0.244	0.24	0.289	0.264	0.253
2	0.435	0.485	0.418	0.443	0.439	0.4	0.411	0.386	0.351
3	1.086	1.157	0.948	0.914	0.958	0.838	0.703	0.72	0.728
4	1.711	1.886	1.778	1.656	1.566	1.525	1.177	1.087	1.088
Figure 2e
days	sgNC			sg#1(ORF-ELFN1-AS1)			sg#2(ORF-ELFN1-AS1)
0	0.155	0.154	0.155	0.155	0.156	0.158	0.162	0.167	0.169
1	0.177	0.166	0.177	0.201	0.189	0.2	0.18	0.172	0.17
2	0.323	0.254	0.281	0.231	0.211	0.214	0.21	0.206	0.215
3	0.648	0.499	0.587	0.453	0.371	0.355	0.409	0.37	0.35
4	1.365	1.281	1.152	0.789	0.729	0.659	0.647	0.637	0.573
Figure 2f
days	sgNC			sg#1(ORF-AC012363.4)			sg#2(ORF-AC012363.4)
0	0.145	0.147	0.143	0.134	0.143	0.142	0.14	0.139	0.141
1	0.165	0.162	0.153	0.158	0.158	0.154	0.148	0.149	0.148
2	0.332	0.321	0.335	0.255	0.26	0.252	0.263	0.262	0.261
3	0.518	0.599	0.583	0.443	0.473	0.455	0.412	0.472	0.451
4	1.065	1.123	1.22	0.809	0.789	0.771	0.709	0.786	0.775
Figure 2g
EV			ORF-ELFN1-AS1			ORF-AC01233.4
122	135	129	191	204	180	183	175	161
Figure 2h
sgNC			sgORF-ELFN1-AS1#1			sgORF-EFLN1-AS1#2
142	163	149	73	50	53	75	76	77
Figure 2i
sgNC			sgAC012363.4#1			sgAC012363.4#2
133	130	123	84	93	99	83	79	90
