# Supplementary material for: CRISPR–Cas9-based functional interrogation of unconventional translatome reveals human cancer dependency on cryptic non-canonical open reading frames
Source: Nat Struct Mol Biol. 2023 Nov 6;30(12):1878–92. doi: 10.1038/s41594-023-01117-1 (PMC10716047; doi:10.1038/s41594-023-01117-1)
Supplement: Supplementary file 7 — Statistical source data. [file 41594_2023_1117_MOESM7_ESM.xlsx]

## Sheet: Figure 4
Figure 4a
days	siNC+EV			siELFN1-AS1+EV			siNC+SMIMP			siELFN1-AS1+SMIMP			siNC+SMIMP(AGG)			siELFN1-AS1+SMIMP(AGG)
0	0.167	0.156	0.155	0.147	0.146	0.146	0.166	0.16	0.165	0.156	0.155	0.153	0.162	0.16	0.16	0.145	0.146	0.146
1	0.244	0.255	0.233	0.213	0.231	0.221	0.252	0.23	0.262	0.226	0.234	0.212	0.255	0.227	0.224	0.206	0.205	0.194
2	0.384	0.37	0.363	0.288	0.269	0.254	0.618	0.464	0.466	0.423	0.36	0.346	0.354	0.346	0.345	0.301	0.279	0.274
3	0.589	0.557	0.514	0.385	0.286	0.335	0.855	0.841	0.868	0.532	0.624	0.567	0.628	0.606	0.593	0.365	0.391	0.351
4	1.044	1.097	0.99	0.523	0.498	0.441	1.444	1.327	1.473	0.923	0.92	0.844	1.062	1.222	1.051	0.53	0.567	0.581
Figure 4b
days	siNC+EV			siELFN1-AS1+EV			siNC+SMIMP			siELFN1-AS1+SMIMP			siNC+SMIMP(AGG)			siELFN1-AS1+SMIMP(AGG)
0	0.132	0.122	0.124	0.116	0.114	0.114	0.13	0.125	0.121	0.122	0.117	0.114	0.124	0.123	0.118	0.119	0.114	0.172
1	0.192	0.179	0.179	0.154	0.142	0.134	0.18	0.154	0.163	0.178	0.163	0.161	0.18	0.172	0.164	0.128	0.136	0.132
2	0.334	0.309	0.331	0.164	0.168	0.159	0.399	0.353	0.327	0.213	0.263	0.243	0.294	0.302	0.272	0.167	0.163	0.159
3	0.877	0.737	0.738	0.252	0.268	0.288	0.91	1.071	0.94	0.705	0.74	0.588	0.807	0.793	0.738	0.378	0.34	0.276
4	1.143	1.095	1.201	0.427	0.402	0.42	1.473	1.531	1.601	1.054	0.902	0.993	1.264	1.266	1.182	0.451	0.54	0.467
Figure 4c
siNC+EV			siELFN1-AS1+EV			siNC+SMIMP			siELFN1-AS1+SMIMP			siNC+SMIMP(AGG)			siELFN1-AS1+SMIMP(AGG)
228	221	222	124	101	116	274	283	277	207	204	207	234	225	267	126	120	164
Figure 4d
siNC+EV			siELFN1-AS1+EV			siNC+SMIMP			siELFN1-AS1+SMIMP			siNC+SMIMP(AGG)			siELFN1-AS1+SMIMP(AGG)
351	349	359	141	120	162	418	433	414	307	317	304	348	388	365	153	163	174
Figure 4f
days	sgNC							sg#1							sg#2
6	47.432	46.746	46.575	41.8275	39.546	36	32.4	44.528	43.56	42.336	41.1845	40.678	39.5035	34.4	34.4	33.6	31.941	29.602	28.158	27.744	26.568
9	75	60.7475	56.448	52.65	46.746	42.8655	40.344	42.025	40.572	37.926	37.6	35.301	31.941	30.118	34.983	32.4625	31.2375	31.046	26.011	22.542	22.3245
12	66.25	63.6265	60.016	51.772	47.068	44.528	42.025	28.749	61.7625	24.854	18.45	49.6125	42.527	21.2355	31.85	30.42	30.0125	28.88	27.648	24.624	17.298
15	92.5	89.2375	69.629	68.4285	66.27	66.25	58.08	51.6375	44.528	40.344	36	34.983	33.212	31.941	47.628	46.208	45.387	36.1415	34.4	34.4	19.22
18	161.604	117.212	109.76	105.456	89.376	89.232	62.426	89.376	67.968	65	57.434	55.176	53.6625	49.6125	75	64.827	55.176	53.6625	46.464	43.4515	32.8
21	196.52	195.201	135.759	119.556	108.9	103.518	102.689	104.976	96.25	87.48	83.824	77.976	65.1655	65.025	78.75	73.008	63.888	61.25	59.643	57.434	50.784
24	316.894	220.5	215.136	196.463	150.822	122.192	120.412	144.55	124.025	117.74	115.351	113.4	111.6	108.9	135.036	134.67	128.993	88.75	81.461	59.904	56.448
27	435.655	289.338	311.647	239.062	205.167	215.136	252.05	177.97	169.884	155.648	147.456	145.762	136.93	87.48	171.088	116.058	115.351	104.104	69.984	68.9265	60
30	347.612	289.688	411.825	441.408	329.476	292.032	265.696	216.562	214.243	199.584	197.173	189.584	167.706	58.08	239.062	196.02	171.396	129.6	117.74	111.392	91.2925
Figure 4i
days	sgNC							sg#1							sg#2
6	42.6228	44.0484	53.0941	37.7558	44.9907	39.8533	41.9509	31.3403	16.5182	35.0273	47.7847	33.5607	42.6228	33.1838	47.7847	35.0273	33.1838	42.6228	37.7558	41.9509	44.9907
9	45.3005	66.0275	37.044	43.56	47.5875	86.2125	51.9115	56.448	51.842	35.2	35.2	48.9985	36	24.5	49.6125	42.8655	73.75	36.822	83.824	46.225	68.9265
12	113.49	97.686	58.752	84.27	108.9	81.12	70.227	45.864	57.5	43.4515	40.8	40.432	37.2645	42.025	52.8	42.527	53.958	130.696	66.27	60.984	81.634
15	173.95	149.683	141.312	134.56	126.514	117	116.964	99.238	74.431	66.654	58.08	55.225	44.528	38.025	88.938	79.233	65.664	58.752	51.842	43.32
18	234.226	209.484	202.612	178.608	159.494	157.604	148.104	127.008	113.724	99.825	88.837	76.832	63.75	48.4	113.724	93.288	87.725	78.652	75.118	66.3255	63.6265
21	328.334	302.016	240.318	236.008	232.73	221.804	196.02	168.338	148.104	131.4	115.2	108	91.2925	83.75	155.648	119.487	113.715	110.466	101.124	85	80.19
24	351.959	310.005	300.938	276.822	257.032	219.488	215.6	198.45	180.774	152.561	127.8	112.694	109.551	99.144	186.293	151.838	135.168	123.462	109.8	104.976	92.2465
27	416.784	344.45	299.218	288	275.699	273.8	273.78	226.482	196	175.071	158.76	148.016	137.216	113.4	197.582	175.712	173.4	152.626	137.216	125.087	102.4
30	521.703	451.25	403.971	331.632	327.228	319.41	304.2	243.648	235.669	188.538	168.683	146.202	121.104	110.808	238.206	192.2	175.071	160.744	141.537	120.6	115.351
Figure 4g
sgNC							sg#1							sg#2
0.38	0.33	0.39	0.32	0.36	0.36	0.29	0.22	0.23	0.16	0.15	0.2	0.08	0.06	0.22	0.19	0.19	0.11	0.18	0.16	0.16
Figure 4j
sgNC							sg#1							sg#2
0.37	0.34	0.42	0.35	0.32	0.28	0.32	0.23	0.12	0.23	0.17	0.15	0.17	0.19	0.22	0.22	0.12	0.13	0.17	0.11	0.15
