# Supplementary material for: CRISPR–Cas9-based functional interrogation of unconventional translatome reveals human cancer dependency on cryptic non-canonical open reading frames
Source: Nat Struct Mol Biol. 2023 Nov 6;30(12):1878–92. doi: 10.1038/s41594-023-01117-1 (PMC10716047; doi:10.1038/s41594-023-01117-1)
Supplement: Supplementary file 10 — Statistical source data. [file 41594_2023_1117_MOESM10_ESM.xlsx]

## Sheet: Figure 6
Figure 6c														Figure 6a
days	siNC			siSMC1A#1			siSMC1A#2							SMC1A expression(log2(TPM+1)	Sample ID	Sample type
0	0.216	0.183	0.176	0.182	0.166	0.165	0.177	0.167	0.164					3.70156	GTEX-WQUQ-2526-SM-4MVNO	Normal-Tissue(GTEx)
1	0.432	0.277	0.275	0.275	0.209	0.207	0.233	0.194	0.186					5.0144	TCGA-D5-6929-01	Tumor
2	0.714	0.603	0.596	0.472	0.358	0.34	0.281	0.237	0.246					5.08539	TCGA-AA-3511-01	Tumor
3	1.051	1.253	1.164	0.806	0.646	0.624	0.51	0.4	0.381					3.26903	GTEX-13G51-2126-SM-5IJD9	Normal-Tissue(GTEx)
4	2.068	2.245	2.083	1.424	1.438	1.379	0.874	1.026	0.906					5.35017	TCGA-QG-A5YX-01	Tumor
														3.92318	GTEX-1122O-1526-SM-5N9CL	Normal-Tissue(GTEx)
Figure 6d														5.46598	TCGA-F4-6704-11	Normal
days	siNC			siSMC1A#1			siSMC1A#2							5.79283	TCGA-CM-6164-01	Tumor
0	0.145	0.136	0.127	0.135	0.125	0.123	0.137	0.136	0.126					5.22146	TCGA-A6-A567-01	Tumor
1	0.195	0.167	0.161	0.163	0.152	0.145	0.162	0.148	0.148					4.00986	TCGA-AA-3516-11	Normal
2	0.295	0.326	0.274	0.234	0.221	0.22	0.198	0.224	0.188					3.23725	TCGA-G4-6320-01	Tumor
3	0.622	0.611	0.522	0.414	0.414	0.356	0.356	0.374	0.336					4.48093	GTEX-146FH-2426-SM-5Q5EW	Normal-Tissue(GTEx)
4	1.384	1.272	1.258	0.896	0.756	0.752	0.714	0.818	0.638					3.86292	GTEX-ZTSS-1126-SM-5985O	Normal-Tissue(GTEx)
														3.58619	GTEX-13N2G-2226-SM-5IJCU	Normal-Tissue(GTEx)
Figure 6e														5.85423	TCGA-AY-A69D-01	Tumor
siNC			siSMC1A#1			siSMC1A#2								5.7785	TCGA-AY-A8YK-01	Tumor
142	135	153	39	35	32	44	45	52						3.41688	GTEX-ZYFC-2626-SM-5NQ6S	Normal-Tissue(GTEx)
														5.09471	TCGA-F4-6806-01	Tumor
Figure 6f														5.37993	TCGA-5M-AAT4-01	Tumor
siNC			siSMC1A#1			siSMC1A#2								5.32842	TCGA-CM-6167-01	Tumor
127	149	149	49	53	46	62	53	77						3.5993	GTEX-ZDYS-2326-SM-4WKG6	Normal-Tissue(GTEx)
														6.23595	TCGA-AZ-6603-01	Tumor
														4.83336	GTEX-ZAB5-1426-SM-5HL9D	Normal-Tissue(GTEx)
Figure 6g														4.69764	GTEX-12WSG-2426-SM-5EQLZ	Normal-Tissue(GTEx)
days	sgNC+EV			sgEL+EV			sgNC+SMC1A			sgEL+SMC1A				6.2174	TCGA-CM-6168-01	Tumor
0	0.159	0.157	0.153	0.152	0.157	0.15	0.164	0.16	0.162	0.163	0.155	0.153		5.08665	TCGA-G4-6314-01	Tumor
1	0.176	0.173	0.175	0.177	0.17	0.17	0.197	0.2	0.191	0.182	0.176	0.177		3.85296	GTEX-ZTSS-1226-SM-51MSZ	Normal-Tissue(GTEx)
2	0.312	0.313	0.28	0.246	0.262	0.227	0.417	0.363	0.34	0.232	0.276	0.299		2.83999	GTEX-13X6I-2726-SM-5Q5ET	Normal-Tissue(GTEx)
3	0.511	0.612	0.436	0.311	0.303	0.305	0.788	0.687	0.664	0.418	0.456	0.578		5.05657	TCGA-F4-6808-01	Tumor
4	1.128	1.063	0.954	0.527	0.551	0.401	1.421	1.391	1.23	0.855	0.908	1.11		4.79546	TCGA-AZ-4615-01	Tumor
														4.96074	TCGA-AY-6386-01	Tumor
														4.71976	TCGA-AZ-6598-01	Tumor
Figure 6h														5.41381	TCGA-A6-6653-01	Tumor
days	sgNC+EV			sgEL+EV			sgNC+SMC1A			sgEL+SMC1A				4.14892	TCGA-NH-A50V-01	Tumor
0	0.122	0.124	0.124	0.12	0.119	0.121	0.136	0.131	0.133	0.117	0.12	0.122		5.91508	TCGA-AD-6899-01	Tumor
1	0.173	0.157	0.154	0.142	0.141	0.139	0.177	0.212	0.203	0.155	0.156	0.152		5.50431	TCGA-G4-6311-01	Tumor
2	0.299	0.287	0.263	0.167	0.17	0.166	0.311	0.399	0.348	0.254	0.297	0.286		3.37299	GTEX-13OW5-2626-SM-5MR3M	Normal-Tissue(GTEx)
3	0.599	0.527	0.493	0.283	0.265	0.238	0.703	0.804	0.667	0.426	0.511	0.502		4.95145	TCGA-A6-2683-11	Normal
4	0.987	0.921	0.874	0.443	0.476	0.5	1.282	1.292	1.113	0.799	0.874	0.806		3.85203	TCGA-DM-A280-01	Tumor
														4.30958	TCGA-NH-A6GC-01	Tumor
Figure 6i														5.4607	TCGA-F4-6570-01	Tumor
sgNC+EV			sgSMIMP+EV			sgNC+SMC1A			sgSMIMP+SMC1A					5.17515	TCGA-CM-6679-01	Tumor
125	138	125	66	66	51	159	186	172	136	131	119			5.53855	TCGA-A6-4105-01	Tumor
														3.57409	GTEX-WH7G-1426-SM-4LVMU	Normal-Tissue(GTEx)
Figure 6j														3.851	GTEX-WHWD-1226-SM-4OOS1	Normal-Tissue(GTEx)
sgNC+EV			sgSMIMP+EV			sgNC+SMC1A			sgSMIMP+SMC1A					6.05356	TCGA-D5-5538-01	Tumor
239	241	207	80	83	78	267	285	293	247	209	203			3.7538	GTEX-11ONC-2026-SM-5HL61	Normal-Tissue(GTEx)
														2.85601	GTEX-ZE7O-2626-SM-51MSS	Normal-Tissue(GTEx)
														4.74902	TCGA-NH-A50U-01	Tumor
														6.65893	TCGA-D5-6924-01	Tumor
														5.68538	TCGA-D5-6931-01	Tumor
														4.10155	TCGA-A6-5656-01	Tumor
														5.33486	TCGA-A6-6649-01	Tumor
														3.62061	GTEX-Y3I4-1426-SM-4TT9C	Normal-Tissue(GTEx)
														3.92318	GTEX-R55G-1226-SM-48FDC	Normal-Tissue(GTEx)
														3.0687	GTEX-1211K-1726-SM-5FQUJ	Normal-Tissue(GTEx)
														4.6398	GTEX-11TT1-0926-SM-5GU5M	Normal-Tissue(GTEx)
														4.3806	TCGA-AA-3518-11	Normal
														3.07381	GTEX-12ZZY-2726-SM-5EQ45	Normal-Tissue(GTEx)
														3.0409	GTEX-Y5V6-1626-SM-4VDT2	Normal-Tissue(GTEx)
														3.33482	GTEX-13PVQ-2726-SM-5L3H7	Normal-Tissue(GTEx)
														5.47576	TCGA-DM-A0X9-01	Tumor
														3.47383	TCGA-DM-A28G-01	Tumor
														4.3512	GTEX-PX3G-1426-SM-48U1J	Normal-Tissue(GTEx)
														5.22574	TCGA-F4-6703-01	Tumor
														3.3089	GTEX-11O72-2226-SM-5PNW2	Normal-Tissue(GTEx)
														5.09674	TCGA-AA-3492-01	Tumor
														5.07724	TCGA-G4-6293-01	Tumor
														4.23722	TCGA-AA-3531-11	Normal
														5.32296	TCGA-DM-A28E-01	Tumor
														6.01614	TCGA-CK-6747-01	Tumor
														6.04194	TCGA-CK-4947-01	Tumor
														4.53361	TCGA-AD-6888-01	Tumor
														3.6904	TCGA-F4-6809-01	Tumor
														5.46109	TCGA-CK-5914-01	Tumor
														5.07898	TCGA-AZ-4313-01	Tumor
														3.84496	GTEX-ZV6S-1126-SM-57WE9	Normal-Tissue(GTEx)
														4.43492	GTEX-1211K-1826-SM-5EGJ2	Normal-Tissue(GTEx)
														4.00723	GTEX-11NSD-1626-SM-5986U	Normal-Tissue(GTEx)
														6.62993	TCGA-G4-6588-01	Tumor
														4.02769	GTEX-XMK1-1726-SM-4B64Z	Normal-Tissue(GTEx)
														4.62464	GTEX-13D11-0626-SM-5LZYY	Normal-Tissue(GTEx)
														5.30483	GTEX-11I78-1326-SM-5PNY9	Normal-Tissue(GTEx)
														4.06612	GTEX-13U4I-2626-SM-5SI9C	Normal-Tissue(GTEx)
														3.59334	GTEX-ZY6K-1226-SM-5GZYL	Normal-Tissue(GTEx)
														3.0858	GTEX-147JS-2526-SM-5S2Q8	Normal-Tissue(GTEx)
														6.26664	TCGA-G4-6309-01	Tumor
														5.1874	TCGA-CM-5868-01	Tumor
														5.15221	TCGA-F4-6855-01	Tumor
														4.15222	GTEX-ZQG8-2426-SM-57WEE	Normal-Tissue(GTEx)
														4.70158	GTEX-V955-1626-SM-4JBHJ	Normal-Tissue(GTEx)
														3.98455	GTEX-ZTTD-2626-SM-57WEX	Normal-Tissue(GTEx)
														4.43092	TCGA-AD-6964-01	Tumor
														4.86	TCGA-G4-6295-01	Tumor
														4.69437	TCGA-D5-5539-01	Tumor
														3.5236	GTEX-13O3O-2526-SM-5L3DR	Normal-Tissue(GTEx)
														4.204	GTEX-QDVN-1326-SM-48TZ3	Normal-Tissue(GTEx)
														5.12724	TCGA-AA-3506-01	Tumor
														5.41998	TCGA-A6-5661-01	Tumor
														4.13996	TCGA-RU-A8FL-01	Tumor
														5.26449	TCGA-5M-AATE-01	Tumor
														4.23722	TCGA-AA-3712-11	Normal
														6.02166	TCGA-A6-6648-01	Tumor
														3.96254	GTEX-OXRL-1426-SM-3NM9E	Normal-Tissue(GTEx)
														5.07335	GTEX-R53T-1326-SM-48FCQ	Normal-Tissue(GTEx)
														4.36033	TCGA-A6-5662-01	Tumor
														3.76974	GTEX-QLQW-0426-SM-447A7	Normal-Tissue(GTEx)
														4.06	TCGA-DM-A1D8-01	Tumor
														3.91365	GTEX-P4QT-1426-SM-3NMCX	Normal-Tissue(GTEx)
														6.01329	TCGA-D5-6539-01	Tumor
														4.40737	TCGA-AZ-6599-01	Tumor
														4.47577	TCGA-G4-6299-01	Tumor
														4.05568	TCGA-AZ-5403-01	Tumor
														4.60824	TCGA-AD-5900-01	Tumor
														3.83091	GTEX-11I78-1226-SM-5A5K6	Normal-Tissue(GTEx)
														5.70264	TCGA-D5-6898-01	Tumor
														4.97313	TCGA-AA-3489-01	Tumor
														3.69935	TCGA-DM-A1D7-01	Tumor
														4.68649	GTEX-13VXT-2026-SM-5L3EW	Normal-Tissue(GTEx)
														3.29721	GTEX-S4Q7-0826-SM-4AD5E	Normal-Tissue(GTEx)
														4.44494	TCGA-AA-A02Y-01	Tumor
														4.89623	TCGA-CM-6676-01	Tumor
														5.2906	TCGA-CA-5797-01	Tumor
														4.77666	GTEX-111YS-1826-SM-5GIEP	Normal-Tissue(GTEx)
														4.92175	TCGA-AA-3496-01	Tumor
														4.39918	GTEX-ZYFG-1826-SM-5GZWX	Normal-Tissue(GTEx)
														4.05916	GTEX-X5EB-1126-SM-46MVV	Normal-Tissue(GTEx)
														6.0448	TCGA-NH-A8F7-06	Tumor
														6.25815	TCGA-NH-A8F7-01	Tumor
														4.24262	GTEX-ZF29-1726-SM-4WKFV	Normal-Tissue(GTEx)
														3.95609	GTEX-146FQ-1926-SM-5NQBY	Normal-Tissue(GTEx)
														6.16552	TCGA-AA-3712-01	Tumor
														2.98735	TCGA-CM-4743-01	Tumor
														4.76019	TCGA-AA-3662-01	Tumor
														4.35471	TCGA-A6-3809-01	Tumor
														4.50845	GTEX-11EQ9-1426-SM-5987G	Normal-Tissue(GTEx)
														3.85296	GTEX-ZVT4-2626-SM-5N9GJ	Normal-Tissue(GTEx)
														3.86199	TCGA-CM-4747-01	Tumor
														5.21494	TCGA-A6-5666-01	Tumor
														2.44093	GTEX-XBEW-1926-SM-4SOJO	Normal-Tissue(GTEx)
														3.84496	GTEX-YF7O-1626-SM-5IFII	Normal-Tissue(GTEx)
														4.37784	TCGA-DM-A285-01	Tumor
														4.69437	GTEX-13CF3-1326-SM-5LZXZ	Normal-Tissue(GTEx)
														5.60737	GTEX-131XG-1526-SM-5GCNQ	Normal-Tissue(GTEx)
														6.79078	TCGA-CM-6171-01	Tumor
														5.32589	TCGA-D5-6538-01	Tumor
														4.29942	GTEX-ZGAY-2126-SM-4YCFB	Normal-Tissue(GTEx)
														5.26712	TCGA-AA-3511-11	Normal
														5.30668	TCGA-A6-2675-01	Tumor
														3.88268	TCGA-G4-6298-01	Tumor
														4.06612	GTEX-11ZVC-2126-SM-5EGJ1	Normal-Tissue(GTEx)
														4.49249	GTEX-12WSL-1826-SM-5LZW9	Normal-Tissue(GTEx)
														2.85998	GTEX-11DXY-2026-SM-5N9CZ	Normal-Tissue(GTEx)
														3.10603	GTEX-ZAB4-2426-SM-5HL8A	Normal-Tissue(GTEx)
														4.73929	GTEX-ZPIC-2626-SM-57WE2	Normal-Tissue(GTEx)
														5.38586	TCGA-A6-6650-01	Tumor
														5.40737	TCGA-AM-5820-01	Tumor
														4.28537	TCGA-AA-3663-01	Tumor
														4.39851	GTEX-Y114-1526-SM-4TT79	Normal-Tissue(GTEx)
														3.5993	GTEX-13OVG-1426-SM-5K7VP	Normal-Tissue(GTEx)
														3.48412	GTEX-Y3IK-1826-SM-4WWDS	Normal-Tissue(GTEx)
														4.71043	GTEX-11P81-1126-SM-5GU5G	Normal-Tissue(GTEx)
														4.08493	GTEX-11TUW-2026-SM-5EQL8	Normal-Tissue(GTEx)
														6.21316	TCGA-A6-6654-01	Tumor
														3.49314	GTEX-148VJ-2426-SM-5NQ9Y	Normal-Tissue(GTEx)
														4.81918	GTEX-11DXX-1926-SM-5EGJK	Normal-Tissue(GTEx)
														3.82069	TCGA-CM-5349-01	Tumor
														4.58676	GTEX-ZZ64-0826-SM-5E449	Normal-Tissue(GTEx)
														4.76125	TCGA-AZ-6599-11	Normal
														4.10772	GTEX-ZAJG-2626-SM-5S2NU	Normal-Tissue(GTEx)
														4.14081	GTEX-ZG7Y-1826-SM-4WWD3	Normal-Tissue(GTEx)
														4.63347	TCGA-A6-2686-11	Normal
														5.37847	TCGA-AZ-6600-01	Tumor
														3.33347	GTEX-11ONC-1926-SM-5GU75	Normal-Tissue(GTEx)
														5.55646	TCGA-AA-3509-01	Tumor
														3.87969	GTEX-13S86-1626-SM-5Q5C5	Normal-Tissue(GTEx)
														4.7703	TCGA-AZ-6606-01	Tumor
														5.77192	TCGA-WS-AB45-01	Tumor
														3.61473	GTEX-ZYFD-2226-SM-5E43P	Normal-Tissue(GTEx)
														6.3482	TCGA-AD-6548-01	Tumor
														3.19379	GTEX-YECK-2826-SM-5IFHF	Normal-Tissue(GTEx)
														3.44628	GTEX-ZF28-2526-SM-57WFH	Normal-Tissue(GTEx)
														3.27648	GTEX-13X6K-2726-SM-5O9DG	Normal-Tissue(GTEx)
														3.25398	GTEX-139T6-1326-SM-5IFFO	Normal-Tissue(GTEx)
														4.90589	GTEX-XXEK-1926-SM-4BRVD	Normal-Tissue(GTEx)
														6.20655	TCGA-D5-6926-01	Tumor
														3.78865	GTEX-111CU-1426-SM-5GZYP	Normal-Tissue(GTEx)
														4.35967	TCGA-AZ-6598-11	Normal
														3.90301	GTEX-145LS-2726-SM-5Q5D8	Normal-Tissue(GTEx)
														4.32772	GTEX-ZZ64-0726-SM-5GZX4	Normal-Tissue(GTEx)
														5.47282	TCGA-A6-6138-01	Tumor
														3.96535	TCGA-AZ-4616-01	Tumor
														3.71699	TCGA-A6-5659-11	Normal
														4.1611	GTEX-Y5LM-1426-SM-5RQJL	Normal-Tissue(GTEx)
														3.57528	GTEX-ZT9W-1726-SM-51MS3	Normal-Tissue(GTEx)
														4.43692	TCGA-AA-A02K-01	Tumor
														4.98049	TCGA-A6-2685-01	Tumor
														4.29429	GTEX-ZLFU-1426-SM-4WWEU	Normal-Tissue(GTEx)
														4.75701	TCGA-AZ-6601-11	Normal
														3.61115	TCGA-DM-A1HA-01	Tumor
														3.90208	GTEX-131YS-2926-SM-5EGKI	Normal-Tissue(GTEx)
														3.03563	GTEX-117YW-1826-SM-5PNY5	Normal-Tissue(GTEx)
														6.2028	TCGA-AA-3713-01	Tumor
														4.83037	TCGA-G4-6627-01	Tumor
														3.90012	GTEX-PWCY-1026-SM-48TD4	Normal-Tissue(GTEx)
														3.7538	GTEX-XUZC-1326-SM-4BRV2	Normal-Tissue(GTEx)
														3.64267	GTEX-147JS-2626-SM-5S2UX	Normal-Tissue(GTEx)
														3.53228	TCGA-AA-3502-01	Tumor
														3.86991	GTEX-13W3W-2126-SM-5K7UX	Normal-Tissue(GTEx)
														3.52232	GTEX-ZVT3-2826-SM-5GU6A	Normal-Tissue(GTEx)
														4.706	TCGA-AA-A01X-01	Tumor
														2.86196	GTEX-WOFM-1926-SM-4OOSP	Normal-Tissue(GTEx)
														6.57698	TCGA-CK-5913-01	Tumor
														2.82374	TCGA-4N-A93T-01	Tumor
														3.72355	GTEX-PWN1-1426-SM-48TDF	Normal-Tissue(GTEx)
														5.36559	TCGA-AZ-6603-11	Normal
														5.1285	TCGA-QG-A5YV-01	Tumor
														5.24141	TCGA-AZ-6607-01	Tumor
														4.09256	TCGA-G4-6321-01	Tumor
														3.60766	GTEX-TKQ2-1326-SM-4DXT9	Normal-Tissue(GTEx)
														3.7677	GTEX-SE5C-1526-SM-4BRWU	Normal-Tissue(GTEx)
														4.0951	TCGA-D5-6536-01	Tumor
														6.14708	TCGA-A6-6140-01	Tumor
														4.44761	TCGA-A6-2682-11	Normal
														5.17437	TCGA-A6-A566-01	Tumor
														5.86966	TCGA-AD-6963-01	Tumor
														4.08578	GTEX-WHSB-0926-SM-4M1XJ	Normal-Tissue(GTEx)
														5.99911	TCGA-D5-5541-01	Tumor
														4.7366	TCGA-AM-5821-01	Tumor
														5.04697	TCGA-A6-6652-01	Tumor
														3.96994	TCGA-DM-A282-01	Tumor
														4.52481	TCGA-AD-6901-01	Tumor
														5.29128	TCGA-CM-6161-01	Tumor
														3.58252	GTEX-S4P3-1226-SM-4AD4Y	Normal-Tissue(GTEx)
														2.99461	GTEX-111VG-2226-SM-5N9DU	Normal-Tissue(GTEx)
														4.55093	TCGA-5M-AAT5-01	Tumor
														3.4303	GTEX-13FHO-2726-SM-5K7VG	Normal-Tissue(GTEx)
														5.19421	TCGA-CK-6748-01	Tumor
														4.35757	GTEX-O5YW-1426-SM-3MJHF	Normal-Tissue(GTEx)
														4.34835	TCGA-A6-5665-11	Normal
														3.74205	GTEX-OHPM-1426-SM-3TW8Y	Normal-Tissue(GTEx)
														3.46728	GTEX-Z93S-2426-SM-5HL8N	Normal-Tissue(GTEx)
														4.69764	GTEX-11P7K-1826-SM-5HL5A	Normal-Tissue(GTEx)
														4.33703	TCGA-AZ-4684-01	Tumor
														4.60641	GTEX-13FH7-1526-SM-5J2N6	Normal-Tissue(GTEx)
														4.06179	TCGA-AA-3517-11	Normal
														4.71091	GTEX-TKQ1-0626-SM-4DXTS	Normal-Tissue(GTEx)
														5.13666	TCGA-G4-6302-01	Tumor
														6.22283	TCGA-AU-6004-01	Tumor
														3.50335	GTEX-ZDTS-2726-SM-5L3E2	Normal-Tissue(GTEx)
														4.50148	GTEX-145ME-0826-SM-5O9AF	Normal-Tissue(GTEx)
														4.19218	TCGA-G4-6310-01	Tumor
														3.78763	GTEX-ZP4G-1726-SM-4WWCM	Normal-Tissue(GTEx)
														4.51725	GTEX-13OVI-2126-SM-5KM3U	Normal-Tissue(GTEx)
														4.14892	TCGA-CA-5255-01	Tumor
														5.38989	TCGA-NH-A6GA-01	Tumor
														5.88922	TCGA-AA-3655-01	Tumor
														4.84745	GTEX-XV7Q-2226-SM-4BRVY	Normal-Tissue(GTEx)
														4.76924	TCGA-A6-2678-11	Normal
														4.3847	TCGA-CM-5863-01	Tumor
														3.45546	GTEX-12696-1926-SM-5EGJT	Normal-Tissue(GTEx)
														4.25702	TCGA-G4-6304-01	Tumor
														5.25592	TCGA-CM-6678-01	Tumor
														2.79074	GTEX-WYJK-2326-SM-4ONDN	Normal-Tissue(GTEx)
														5.69656	TCGA-A6-5657-01	Tumor
														5.74186	TCGA-A6-2672-01	Tumor
														5.1081	TCGA-D5-6930-01	Tumor
														5.60081	TCGA-F4-6805-01	Tumor
														3.91935	TCGA-DM-A28M-01	Tumor
														5.87232	TCGA-QL-A97D-01	Tumor
														3.27504	GTEX-ZYT6-2826-SM-5GICX	Normal-Tissue(GTEx)
														3.66338	GTEX-ZQUD-1026-SM-4YCEZ	Normal-Tissue(GTEx)
														2.29275	GTEX-ZVZQ-2626-SM-59HLB	Normal-Tissue(GTEx)
														5.57075	TCGA-3L-AA1B-01	Tumor
														4.52232	TCGA-CM-5860-01	Tumor
														4.33485	GTEX-ZPU1-1726-SM-4WWFV	Normal-Tissue(GTEx)
														3.86888	TCGA-A6-2684-11	Normal
														4.62934	GTEX-XAJ8-0426-SM-47JYJ	Normal-Tissue(GTEx)
														4.62761	TCGA-AA-3534-11	Normal
														4.69543	TCGA-A6-2679-11	Normal
														7.05558	TCGA-SS-A7HO-01	Tumor
														4.45944	GTEX-YJ8A-1726-SM-5P9IQ	Normal-Tissue(GTEx)
														4.76549	GTEX-T6MO-0826-SM-4DM51	Normal-Tissue(GTEx)
														5.40697	TCGA-D5-6537-01	Tumor
														4.10094	TCGA-AA-3495-01	Tumor
														5.09975	TCGA-CA-5254-01	Tumor
														5.09975	TCGA-AD-A5EK-01	Tumor
														6.25095	TCGA-CK-6746-01	Tumor
														5.94715	TCGA-CA-6718-01	Tumor
														4.55218	TCGA-AY-5543-01	Tumor
														4.08239	GTEX-Y114-1626-SM-4TT7I	Normal-Tissue(GTEx)
														6.31936	TCGA-CK-4952-01	Tumor
														5.97549	TCGA-F4-6807-01	Tumor
														3.39234	GTEX-NFK9-2026-SM-3LK5K	Normal-Tissue(GTEx)
														3.40736	GTEX-12C56-0626-SM-5EGGC	Normal-Tissue(GTEx)
														5.72687	TCGA-CK-5915-01	Tumor
														3.40329	GTEX-ZVP2-1526-SM-5NQ82	Normal-Tissue(GTEx)
														4.33273	TCGA-A6-6781-01	Tumor
														4.64211	TCGA-AZ-6605-11	Normal
														4.58015	TCGA-AU-3779-01	Tumor
														2.93357	TCGA-DM-A1D4-01	Tumor
														4.64614	GTEX-13PVR-1726-SM-5Q5EC	Normal-Tissue(GTEx)
														4.06	TCGA-DM-A1D0-01	Tumor
														3.20948	GTEX-T5JW-1126-SM-4DM5V	Normal-Tissue(GTEx)
														3.23109	GTEX-13OW6-2226-SM-5N9FL	Normal-Tissue(GTEx)
														4.38403	GTEX-13U4I-2426-SM-5LU34	Normal-Tissue(GTEx)
														4.04525	TCGA-A6-2671-11	Normal
														5.84195	TCGA-CM-6675-01	Tumor
														3.32914	GTEX-11PRG-2026-SM-5GU5F	Normal-Tissue(GTEx)
														5.68509	TCGA-AY-6197-01	Tumor
														4.96393	GTEX-12BJ1-2026-SM-5FQUH	Normal-Tissue(GTEx)
														3.43693	GTEX-11ZU8-1126-SM-5EQ5K	Normal-Tissue(GTEx)
														3.54352	GTEX-YF7O-1726-SM-5IFJ9	Normal-Tissue(GTEx)
														3.87084	TCGA-DM-A28K-01	Tumor
														3.85501	GTEX-WY7C-1926-SM-4ONCI	Normal-Tissue(GTEx)
														3.46728	GTEX-145MO-2626-SM-5QGPD	Normal-Tissue(GTEx)
														2.88753	GTEX-12BJ1-2126-SM-5BC5O	Normal-Tissue(GTEx)
														3.99008	TCGA-G4-6307-01	Tumor
														3.40872	GTEX-145MN-1726-SM-5SIA6	Normal-Tissue(GTEx)
														3.30449	GTEX-11EI6-2626-SM-5PNVT	Normal-Tissue(GTEx)
														3.46728	GTEX-132NY-2726-SM-5PNY2	Normal-Tissue(GTEx)
														3.65187	GTEX-TML8-1326-SM-4DXTO	Normal-Tissue(GTEx)
														3.27352	GTEX-148VJ-2626-SM-5QGPI	Normal-Tissue(GTEx)
														4.89623	TCGA-CM-5861-01	Tumor
														4.0108	GTEX-XXEK-1826-SM-4BRVC	Normal-Tissue(GTEx)
														4.74574	TCGA-CA-5796-01	Tumor
														5.39985	TCGA-AZ-4323-01	Tumor
														5.40805	TCGA-DM-A1DA-01	Tumor
														5.71235	TCGA-D5-6928-01	Tumor
														3.78448	TCGA-AA-3685-01	Tumor
														4.29429	GTEX-ZF2S-1926-SM-4WWAN	Normal-Tissue(GTEx)
														4.27579	GTEX-OXRK-1726-SM-3NB16	Normal-Tissue(GTEx)
														3.38401	GTEX-PLZ5-1126-SM-3P613	Normal-Tissue(GTEx)
														3.04441	GTEX-Z93S-2626-SM-57WBX	Normal-Tissue(GTEx)
														3.09251	GTEX-145MH-2726-SM-5QGQ6	Normal-Tissue(GTEx)
														5.19966	TCGA-A6-5664-01	Tumor
														4.26299	TCGA-AZ-5407-01	Tumor
														4.44694	TCGA-AA-3522-11	Normal
														4.35263	GTEX-1339X-1726-SM-5P9J9	Normal-Tissue(GTEx)
														4.81503	TCGA-AA-3496-11	Normal
														3.98736	GTEX-11P7K-1526-SM-5EGI7	Normal-Tissue(GTEx)
														4.3016	TCGA-AY-6196-01	Tumor
														4.21412	GTEX-11DXZ-1626-SM-5GIDI	Normal-Tissue(GTEx)
														5.76259	TCGA-D5-6920-01	Tumor
														5.02942	TCGA-F4-6461-01	Tumor
														4.08917	GTEX-Y8LW-1226-SM-4WWDP	Normal-Tissue(GTEx)
														4.99686	GTEX-14BMU-1326-SM-5RQIH	Normal-Tissue(GTEx)
														4.98591	TCGA-A6-5667-11	Normal
														5.27199	TCGA-D5-6540-01	Tumor
														4.63107	GTEX-12WSJ-1426-SM-5GCON	Normal-Tissue(GTEx)
														3.55706	GTEX-X4EO-2726-SM-4E3HS	Normal-Tissue(GTEx)
														6.53681	TCGA-G4-6297-01	Tumor
														3.24486	GTEX-XQ8I-2126-SM-4BOOM	Normal-Tissue(GTEx)
														3.66108	TCGA-A6-2686-01	Tumor
														4.9621	TCGA-DM-A28F-01	Tumor
														4.31547	GTEX-WY7C-1626-SM-4ONC8	Normal-Tissue(GTEx)
														3.45809	GTEX-VJYA-2026-SM-4KL1K	Normal-Tissue(GTEx)
														3.21724	TCGA-CA-5256-01	Tumor
														5.19927	TCGA-A6-6142-01	Tumor
														3.93645	GTEX-13113-1426-SM-5EGHU	Normal-Tissue(GTEx)
														3.74519	GTEX-ZPU1-1926-SM-57WDT	Normal-Tissue(GTEx)
														4.669	GTEX-S341-1426-SM-4AD6U	Normal-Tissue(GTEx)
														4.9203	TCGA-AZ-6608-01	Tumor
														4.80529	GTEX-145ME-1126-SM-5SIAT	Normal-Tissue(GTEx)
														4.47892	GTEX-111YS-1626-SM-5GZZ9	Normal-Tissue(GTEx)
														3.50079	GTEX-14C39-1626-SM-5S2P4	Normal-Tissue(GTEx)
														3.84095	GTEX-RM2N-0926-SM-48FD1	Normal-Tissue(GTEx)
														4.96858	GTEX-117YX-0826-SM-5H11J	Normal-Tissue(GTEx)
														3.31321	GTEX-11DXZ-1726-SM-5H12M	Normal-Tissue(GTEx)
														4.01877	TCGA-A6-6141-01	Tumor
														4.38403	TCGA-G4-6306-01	Tumor
														4.1276	TCGA-AA-3525-11	Normal
														6.03997	TCGA-D5-6922-01	Tumor
														4.33485	GTEX-Q734-1126-SM-48TZY	Normal-Tissue(GTEx)
														3.99729	GTEX-QDVJ-1326-SM-48U1X	Normal-Tissue(GTEx)
														3.99823	TCGA-DM-A288-01	Tumor
														4.31252	TCGA-AZ-6600-11	Normal
														3.49824	GTEX-145LT-0926-SM-5LU9C	Normal-Tissue(GTEx)
														3.79802	GTEX-OIZH-1426-SM-3NB1O	Normal-Tissue(GTEx)
														3.27199	GTEX-XV7Q-2126-SM-4BRVX	Normal-Tissue(GTEx)
														4.56501	GTEX-11P81-1426-SM-5P9JN	Normal-Tissue(GTEx)
														4.33846	GTEX-WEY5-1426-SM-4LMJ3	Normal-Tissue(GTEx)
														3.72133	GTEX-W5WG-2426-SM-4LMI6	Normal-Tissue(GTEx)
														4.20003	TCGA-DM-A1HB-01	Tumor
														3.38817	GTEX-13OVJ-1826-SM-5KM2D	Normal-Tissue(GTEx)
														4.3512	GTEX-RU1J-1326-SM-46MUL	Normal-Tissue(GTEx)
														3.48412	GTEX-R55D-1826-SM-48FEF	Normal-Tissue(GTEx)
														4.18188	GTEX-X3Y1-1726-SM-4PQZL	Normal-Tissue(GTEx)
														4.48418	GTEX-12WSJ-1526-SM-5GCNI	Normal-Tissue(GTEx)
														2.30454	GTEX-14E6E-1526-SM-5RQIG	Normal-Tissue(GTEx)
														4.72572	TCGA-A6-2682-01	Tumor
														3.86693	GTEX-X15G-1526-SM-4PQZM	Normal-Tissue(GTEx)
														6.02855	TCGA-CK-4951-01	Tumor
														5.48221	TCGA-CK-4948-01	Tumor
														4.77454	GTEX-13FH7-1626-SM-5J2O9	Normal-Tissue(GTEx)
														3.85799	GTEX-ZVT2-1726-SM-51MRO	Normal-Tissue(GTEx)
														2.98185	GTEX-13QBU-1826-SM-5IJG3	Normal-Tissue(GTEx)
														5.54256	TCGA-F4-6856-01	Tumor
														5.13336	TCGA-F4-6569-01	Tumor
														5.41586	TCGA-CM-6163-01	Tumor
														6.32677	TCGA-D5-6535-01	Tumor
														4.03126	GTEX-P78B-1726-SM-3P5ZV	Normal-Tissue(GTEx)
														3.83491	GTEX-14A5H-1626-SM-5SIAN	Normal-Tissue(GTEx)
														5.22924	TCGA-5M-AAT6-01	Tumor
														4.03651	TCGA-A6-5662-11	Normal
														4.204	TCGA-AA-3526-01	Tumor
														3.73983	GTEX-UJHI-1126-SM-4IHLN	Normal-Tissue(GTEx)
														5.14978	TCGA-AA-3514-11	Normal
														5.19061	TCGA-AD-6895-01	Tumor
														4.88898	TCGA-G4-6586-01	Tumor
														4.51983	GTEX-13O61-1526-SM-5KM3P	Normal-Tissue(GTEx)
														4.28613	TCGA-NH-A8F8-01	Tumor
														4.66842	TCGA-D5-6529-01	Tumor
														4.78717	TCGA-DM-A0XF-01	Tumor
														3.69381	GTEX-XBED-1526-SM-4AT5W	Normal-Tissue(GTEx)
														5.93643	TCGA-A6-5667-01	Tumor
														3.23573	GTEX-UJMC-1326-SM-4IHLS	Normal-Tissue(GTEx)
														3.28096	GTEX-11TUW-2326-SM-5EQMO	Normal-Tissue(GTEx)
														4.3434	GTEX-139YR-2126-SM-5KM11	Normal-Tissue(GTEx)
														3.67583	GTEX-Y8E4-2426-SM-4WWDN	Normal-Tissue(GTEx)
														5.39467	TCGA-CM-6169-01	Tumor
														3.83891	GTEX-Q2AH-1226-SM-48TZL	Normal-Tissue(GTEx)
														4.00901	GTEX-WQUQ-2626-SM-4MVNP	Normal-Tissue(GTEx)
														3.04441	GTEX-12ZZX-2726-SM-5N9FT	Normal-Tissue(GTEx)
														5.99478	TCGA-CA-6719-01	Tumor
														4.51218	GTEX-11ZTT-1626-SM-5EQKR	Normal-Tissue(GTEx)
														6.73539	TCGA-D5-7000-01	Tumor
														5.87458	TCGA-G4-6625-01	Tumor
														5.28758	TCGA-CM-6680-01	Tumor
														3.61473	GTEX-11ZTS-1526-SM-5N9G7	Normal-Tissue(GTEx)
														4.09679	GTEX-XUW1-1926-SM-4BOP1	Normal-Tissue(GTEx)
														3.97546	GTEX-QMRM-1226-SM-447C6	Normal-Tissue(GTEx)
														3.72679	GTEX-WFG7-1526-SM-4LVMG	Normal-Tissue(GTEx)
														3.67693	GTEX-WH7G-1326-SM-4LVMS	Normal-Tissue(GTEx)
														4.7835	TCGA-CM-6166-01	Tumor
														4.00723	GTEX-Y3I4-1126-SM-4TT7Y	Normal-Tissue(GTEx)
														4.60411	GTEX-12WSL-1626-SM-5GCMU	Normal-Tissue(GTEx)
														3.88557	GTEX-W5WG-2026-SM-4LMIB	Normal-Tissue(GTEx)
														5.52446	TCGA-NH-A6GB-01	Tumor
														6.91509	TCGA-D5-6923-01	Tumor
														5.44526	TCGA-AZ-4614-01	Tumor
														4.66506	TCGA-CM-5864-01	Tumor
														3.76445	GTEX-147F3-1926-SM-5SIB9	Normal-Tissue(GTEx)
														3.22653	GTEX-11EQ8-2626-SM-5N9BO	Normal-Tissue(GTEx)
														4.31328	GTEX-111CU-1226-SM-5EGIN	Normal-Tissue(GTEx)
														3.58857	TCGA-AA-3655-11	Normal
														5.48319	TCGA-CK-5912-01	Tumor
														6.07937	TCGA-D5-6927-01	Tumor
														3.64037	GTEX-ZV7C-1526-SM-5NQ72	Normal-Tissue(GTEx)
														4.62934	TCGA-QG-A5YW-01	Tumor
														3.37434	GTEX-11TTK-2426-SM-5PNYO	Normal-Tissue(GTEx)
														4.35615	GTEX-ZY6K-1326-SM-5GZWP	Normal-Tissue(GTEx)
														6.19728	TCGA-D5-6532-01	Tumor
														5.5823	TCGA-CM-6172-01	Tumor
														2.95237	GTEX-13CF2-1826-SM-5N9GK	Normal-Tissue(GTEx)
														6.48528	TCGA-D5-6533-01	Tumor
														3.31321	GTEX-13PL7-2526-SM-5IFGR	Normal-Tissue(GTEx)
														4.33342	TCGA-AA-3697-11	Normal
														5.4226	TCGA-DM-A28H-01	Tumor
														4.74844	TCGA-F4-6460-01	Tumor
														3.40193	TCGA-D5-5540-01	Tumor
														4.92746	TCGA-A6-5660-01	Tumor
														4.12685	TCGA-F4-6463-01	Tumor
														3.6656	GTEX-133LE-1526-SM-5IFEN	Normal-Tissue(GTEx)
														5.46667	TCGA-CM-6170-01	Tumor
														2.75488	GTEX-1399R-2226-SM-5P9JB	Normal-Tissue(GTEx)
														4.23495	TCGA-AA-3662-11	Normal
														5.01033	TCGA-QG-A5Z2-01	Tumor
														4.86696	TCGA-A6-2675-11	Normal
														3.77817	GTEX-Y5LM-1526-SM-4VDTA	Normal-Tissue(GTEx)
														3.1473	GTEX-1212Z-1826-SM-5FQSH	Normal-Tissue(GTEx)
														3.68256	GTEX-ZXES-1626-SM-5NQ7L	Normal-Tissue(GTEx)
														2.79699	GTEX-13111-0726-SM-5DUVE	Normal-Tissue(GTEx)
														4.26081	GTEX-131XE-1026-SM-5EGKE	Normal-Tissue(GTEx)
														3.71043	GTEX-ZEX8-1926-SM-4WKFR	Normal-Tissue(GTEx)
														4.91266	TCGA-G4-6294-01	Tumor
														3.49441	GTEX-13OW8-2726-SM-5L3FZ	Normal-Tissue(GTEx)
														4.5273	TCGA-D5-6530-01	Tumor
														3.42359	GTEX-145LS-2926-SM-5O99G	Normal-Tissue(GTEx)
														3.16186	GTEX-145MO-2426-SM-5NQ9W	Normal-Tissue(GTEx)
														4.68312	TCGA-G4-6315-01	Tumor
														5.15425	TCGA-AA-A01P-01	Tumor
														5.03029	TCGA-G4-6303-01	Tumor
														3.36179	GTEX-13FHP-2426-SM-5KLZ5	Normal-Tissue(GTEx)
														3.05831	GTEX-13O21-2426-SM-5MR4A	Normal-Tissue(GTEx)
														4.3434	GTEX-132AR-2726-SM-5PNVN	Normal-Tissue(GTEx)
														4.0934	TCGA-AZ-4682-01	Tumor
														4.71264	TCGA-AA-3527-11	Normal
														5.00722	TCGA-AD-6890-01	Tumor
														4.68927	GTEX-XAJ8-0726-SM-47JY5	Normal-Tissue(GTEx)
														4.27503	TCGA-AD-6889-01	Tumor
														3.17955	GTEX-147GR-2826-SM-5RQK8	Normal-Tissue(GTEx)
														4.53418	GTEX-XUW1-1826-SM-4BOQD	Normal-Tissue(GTEx)
														3.48029	GTEX-11DXX-1826-SM-5H126	Normal-Tissue(GTEx)
														5.68764	TCGA-CK-4950-01	Tumor
														3.99636	TCGA-CM-5344-01	Tumor
														5.15095	TCGA-QG-A5Z1-01	Tumor
														4.52481	GTEX-1122O-1426-SM-5H11R	Normal-Tissue(GTEx)
														3.25551	GTEX-ZAB4-2226-SM-5HL97	Normal-Tissue(GTEx)
														4.9832	TCGA-G4-6628-01	Tumor
														5.17632	TCGA-D5-6534-01	Tumor
														3.13586	GTEX-12WSM-1426-SM-5GCPA	Normal-Tissue(GTEx)
														3.9486	GTEX-WXYG-1726-SM-4ONCU	Normal-Tissue(GTEx)
														4.10433	TCGA-AA-3663-11	Normal
														5.1116	TCGA-A6-5659-01	Tumor
														3.56686	GTEX-11EMC-1426-SM-5N9E4	Normal-Tissue(GTEx)
														2.90112	GTEX-U3ZM-1126-SM-4DXUB	Normal-Tissue(GTEx)
														3.80944	TCGA-CM-5862-01	Tumor
														3.82273	GTEX-131XE-0826-SM-5HL9W	Normal-Tissue(GTEx)
														5.14609	TCGA-AA-3697-01	Tumor
														4.63635	TCGA-F4-6704-01	Tumor
														4.06696	GTEX-ZA64-1426-SM-5CVMC	Normal-Tissue(GTEx)
														5.33915	TCGA-CK-6751-01	Tumor
														4.34131	GTEX-13111-1926-SM-5GCOL	Normal-Tissue(GTEx)
														5.84519	TCGA-AD-A5EJ-01	Tumor
														5.31253	TCGA-T9-A92H-01	Tumor
														3.2479	TCGA-AA-3713-11	Normal
														5.21571	TCGA-CA-6716-01	Tumor
														3.63807	TCGA-AA-3660-11	Normal
														3.74954	TCGA-AA-3489-11	Normal
														4.53294	GTEX-13W3W-2226-SM-5LU4M	Normal-Tissue(GTEx)
														5.01973	TCGA-AA-A01Z-01	Tumor
														3.75917	GTEX-13SLW-2826-SM-5Q5ES	Normal-Tissue(GTEx)
														4.01436	GTEX-1128S-1626-SM-5H12O	Normal-Tissue(GTEx)
														4.73333	GTEX-14AS3-1126-SM-5Q5CR	Normal-Tissue(GTEx)
														4.25702	GTEX-Q2AI-0926-SM-48U1F	Normal-Tissue(GTEx)
														4.72736	TCGA-D5-5537-01	Tumor
														2.94296	GTEX-SNOS-1226-SM-4DM5H	Normal-Tissue(GTEx)
														3.56557	GTEX-YB5E-1626-SM-5IFIQ	Normal-Tissue(GTEx)
														6.02412	TCGA-D5-6531-01	Tumor
														4.08663	TCGA-G4-6317-02	Tumor
														4.31252	TCGA-DM-A1D9-01	Tumor
														6.19096	TCGA-DM-A1DB-01	Tumor
														4.72351	TCGA-A6-A5ZU-01	Tumor
														6.12904	TCGA-NH-A5IV-01	Tumor
														5.42455	TCGA-A6-6651-01	Tumor
														6.1739	TCGA-CA-6715-01	Tumor
														3.35475	GTEX-117XS-2226-SM-5GIE1	Normal-Tissue(GTEx)
														4.65997	GTEX-WYVS-1126-SM-4SOJX	Normal-Tissue(GTEx)
														4.42758	TCGA-CM-6674-01	Tumor
														3.66338	GTEX-XYKS-2226-SM-4E3IU	Normal-Tissue(GTEx)
														4.53103	TCGA-D5-6932-01	Tumor
														5.09509	TCGA-A6-2685-11	Normal
														5.60972	TCGA-A6-6137-01	Tumor
														4.90928	GTEX-117YX-0526-SM-5EGJH	Normal-Tissue(GTEx)
														3.48412	GTEX-12KS4-2426-SM-5LU8P	Normal-Tissue(GTEx)
														6.77205	TCGA-CK-5916-01	Tumor
														3.58857	GTEX-ZF2S-1826-SM-4WKFF	Normal-Tissue(GTEx)
														6.31255	TCGA-F4-6459-01	Tumor
														4.27949	GTEX-ZYFG-1926-SM-5GID5	Normal-Tissue(GTEx)
														5.14074	TCGA-CM-6165-01	Tumor
														3.11271	TCGA-A6-3810-01	Tumor
														2.69824	GTEX-14DAR-1526-SM-5RQIX	Normal-Tissue(GTEx)
														3.91904	TCGA-A6-6780-01	Tumor
														3.33626	GTEX-14A5I-2426-SM-5Q5CP	Normal-Tissue(GTEx)
														3.83389	GTEX-ZF29-1826-SM-4WKG8	Normal-Tissue(GTEx)
														4.15949	GTEX-ZYVF-2826-SM-5GIDK	Normal-Tissue(GTEx)
														3.41688	GTEX-1399S-1926-SM-5J2M5	Normal-Tissue(GTEx)
														4.96761	GTEX-13CF3-1426-SM-5K7YY	Normal-Tissue(GTEx)
														5.49697	TCGA-CM-6677-01	Tumor
														4.13835	GTEX-13O61-1626-SM-5KM3T	Normal-Tissue(GTEx)
														4.14647	TCGA-G4-6322-01	Tumor
														5.92856	TCGA-F4-6854-01	Tumor
														5.19023	TCGA-A6-A565-01	Tumor
														2.98185	GTEX-ZE9C-2126-SM-4WKGY	Normal-Tissue(GTEx)
														3.93261	GTEX-XGQ4-1226-SM-4AT67	Normal-Tissue(GTEx)
														5.50587	TCGA-A6-A56B-01	Tumor
														3.76232	GTEX-WFG8-1726-SM-4LVM6	Normal-Tissue(GTEx)
														5.20316	TCGA-AY-A54L-01	Tumor
														4.43054	TCGA-A6-5665-01	Tumor
														3.04788	TCGA-A6-2677-01	Tumor
														6.63893	TCGA-CM-6162-01	Tumor
														3.81251	GTEX-144GM-1226-SM-5LU52	Normal-Tissue(GTEx)
														3.97546	GTEX-WI4N-2226-SM-4OOS9	Normal-Tissue(GTEx)
														4.1627	TCGA-D5-6541-01	Tumor
														5.05618	TCGA-CM-5348-01	Tumor
														3.77298	GTEX-11GSP-1626-SM-5986N	Normal-Tissue(GTEx)
														4.50903	TCGA-4T-AA8H-01	Tumor
														3.36874	GTEX-13D11-0826-SM-5KLZJ	Normal-Tissue(GTEx)
														4.19927	TCGA-5M-AATA-01	Tumor
														4.36033	TCGA-AY-A71X-01	Tumor
														4.71091	TCGA-NH-A50T-01	Tumor
														4.88367	TCGA-AA-3520-11	Normal
														4.37508	TCGA-DM-A28C-01	Tumor
														4.22803	GTEX-1399R-2126-SM-5K7WZ	Normal-Tissue(GTEx)
														2.83388	GTEX-WOFM-2026-SM-4OOSQ	Normal-Tissue(GTEx)
														5.81994	TCGA-AD-6965-01	Tumor
														3.7071	TCGA-DM-A0XD-01	Tumor
														4.00986	GTEX-YEC4-1926-SM-5IFHJ	Normal-Tissue(GTEx)
														4.43225	GTEX-WHWD-1526-SM-4OORV	Normal-Tissue(GTEx)
														4.01614	GTEX-S7SF-1926-SM-4AT5B	Normal-Tissue(GTEx)
														3.85994	GTEX-QCQG-1626-SM-48U26	Normal-Tissue(GTEx)
														5.54168	TCGA-CA-6717-01	Tumor
														4.52356	TCGA-A6-6782-01	Tumor
														3.21487	TCGA-A6-2674-01	Tumor
														4.11271	GTEX-ZP4G-1526-SM-57WE5	Normal-Tissue(GTEx)
														5.02855	TCGA-G4-6626-01	Tumor
														5.27501	GTEX-132AR-2826-SM-5IJFV	Normal-Tissue(GTEx)
														3.9588	GTEX-WHPG-1626-SM-4M1ZL	Normal-Tissue(GTEx)
														3.36738	GTEX-13O1R-2426-SM-5KLZZ	Normal-Tissue(GTEx)
														3.54965	GTEX-11GS4-1826-SM-5HL4T	Normal-Tissue(GTEx)
														3.46337	TCGA-CM-4744-01	Tumor
														4.77136	TCGA-AZ-6605-01	Tumor
														4.63577	TCGA-A6-2680-11	Normal
														3.81966	GTEX-WRHK-1126-SM-4MVOJ	Normal-Tissue(GTEx)
														3.73659	GTEX-11EQ9-1526-SM-5PNY7	Normal-Tissue(GTEx)
														5.10228	TCGA-AZ-6601-01	Tumor
														2.94114	GTEX-WFON-1426-SM-4LVMT	Normal-Tissue(GTEx)
														3.16514	GTEX-11P82-1026-SM-5BC5J	Normal-Tissue(GTEx)
														4.38034	TCGA-A6-2684-01	Tumor
														3.29721	GTEX-ZLV1-1226-SM-4WWBX	Normal-Tissue(GTEx)
														4.28983	TCGA-AZ-4315-01	Tumor
														4.35681	TCGA-CM-4751-01	Tumor
														4.10433	TCGA-AA-3675-01	Tumor
														3.98642	GTEX-X15G-1326-SM-4PQZJ	Normal-Tissue(GTEx)
														4.43826	TCGA-G4-6317-01	Tumor
														5.24677	TCGA-DM-A28A-01	Tumor
														5.65852	TCGA-AA-3660-01	Tumor
