# Supplementary material for: CRISPR–Cas9-based functional interrogation of unconventional translatome reveals human cancer dependency on cryptic non-canonical open reading frames
Source: Nat Struct Mol Biol. 2023 Nov 6;30(12):1878–92. doi: 10.1038/s41594-023-01117-1 (PMC10716047; doi:10.1038/s41594-023-01117-1)
Supplement: Supplementary file 12 — Statistical source data. [file 41594_2023_1117_MOESM12_ESM.xlsx]

## Sheet: Figure 7
Figure 7c
	sgNC			sg#1			sg#2
CDKN1A	0.93	0.96	1.13	4.29	4.2	4.47	4.38	4.44	4.44
CDKN2B	0.9	1.27	0.88	1.78	1.85	2	1.88	2.01	2.69
Figure 7d
	shNC			shSMC1A#1			shSMC1A#2
CDKN1A	0.98	0.99	1.02	3.2	2.96	2.88	2.88	2.75	2.74
CDKN2B	0.92	0.94	1.15	4.43	4.81	5.02	3.36	4.37	4.05
SMC1A	0.99	0.99	1.02	0.12	0.11	0.1	0.1	0.09	0.08
Figure 7e
	siNC+EV			siNC+SMIMP			siNC+SMIMP(M)			siSMC1A+EV			siSMC1A+SMIMP			siSMC1A+SMIMP(M)
CDKN1A	1.06	1.03	0.92	0.51	0.56	0.49	1.01	0.95	0.99	2.6	2.97	2.51	1.59	1.75	1.3	2.85	2.91	2.66
CDKN2B	0.74	1.13	1.19	0.54	0.65	0.6	1.12	1.57	1.96	2.9	2.67	3.43	0.98	1.28	1.45	2.35	2.94	2.9
Figure 7g
	IP anti-SMC1A			IP IgG
CDKN1A	0.04363	0.042457	0.043194	0.000741	0.000765	0.000909
CDKN2B	0.2079	0.2077	0.2327	0.001774	0.000955	0.000205
Figure 7h
	IP anti-Flag			IP IgG
CDKN1A	0.019112	0.022424	0.01892	0.001832	0.002764	0.00138
CDKN2B	0.019479	0.009692	0.014944	0.001944	0.002047	0.001071
Figure 7i
	sgNC IP			sgNC IgG			sgSMIMP#1 IP			sg#SMIMP1 IgG			sgSMIMP#2 IP			sgSMIMP#2 IgG
CDKN1A	0.017303	0.01906	0.023515	0.002464	0.000892	0.000484	0.008711	0.013092	0.010892	0.001609	0.000434	0.000635	0.00615	0.00831	0.007255	0.000415	0.000444	0.000554
CDKN2B	0.107812	0.126301	0.146965	0.000392	0.000594	0.000201	0.056543	0.055622	0.058629	0.000177	0.000898	0.000624	0.04131	0.040465	0.046107	0.000595	0.000531	0.001101
Figure 7j
	siNC+EV			siNC+SMIMP			siNC+SMIMP(M)			siELFN1-AS1+EV			siELFN1-AS1+SMIMP			siELFN1-AS1+SMIMP(M)
CDKN1A	0.027667	0.038702	0.02893	0.042406	0.05018	0.045084	0.033851	0.030253	0.03223	0.008537	0.011951	0.009904	0.025174	0.031618	0.030153	0.008869	0.018009	0.011767
CDKN2B	0.13289	0.133913	0.145836	0.220062	0.21885	0.258926	0.153937	0.14481	0.167578	0.044796	0.040084	0.051072	0.113549	0.132818	0.148765	0.047914	0.06524	0.072389
