# Supplementary material for: CRISPR–Cas9-based functional interrogation of unconventional translatome reveals human cancer dependency on cryptic non-canonical open reading frames
Source: Nat Struct Mol Biol. 2023 Nov 6;30(12):1878–92. doi: 10.1038/s41594-023-01117-1 (PMC10716047; doi:10.1038/s41594-023-01117-1)
Supplement: Supplementary file 13 — Statistical source data. [file 41594_2023_1117_MOESM13_ESM.xlsx]

## Sheet: Sheet1
Figure 8f														Figure 8b				Figure 8c				Figure 8d
days	sgNC			sgSMIMP#1			sgSMIMP#2							Expression(log2(TPM+1)	Sample ID	Sample type		Expression(log2(TPM+1)	Sample ID	Sample type		Expression(log2(TPM+1)	Sample ID	Sample type
0	0.127	0.138	0.133	0.136	0.124	0.119	0.127	0.126	0.123					4.97681	TCGA-R6-A8WC-01	Tumor		4.52605	TCGA-BR-A4QL-01	Tumor		0.454178	GTEX-PWCY-1326-SM-48TCU	Normal-Tissue(GTEx)
1	0.464	0.43	0.404	0.341	0.341	0.299	0.349	0.331	0.301					6.00521	TCGA-L5-A4OH-01	Tumor		0.526084	GTEX-QLQ7-0826-SM-447B3	Normal-Tissue(GTEx)		0.505893	TCGA-13-1485-01	Tumor
2	0.518	0.491	0.483	0.318	0.363	0.329	0.318	0.301	0.3					-1.57153e-08	GTEX-11DXY-1526-SM-5H129	Normal-Tissue(GTEx)		1.35616	TCGA-VQ-A927-01	Tumor		0.189038	GTEX-14AS3-1326-SM-5RQJE	Normal-Tissue(GTEx)
3	1.068	0.883	0.947	0.56	0.56	0.548	0.603	0.494	0.544					0.163501	GTEX-Y111-1826-SM-4SOIR	Normal-Tissue(GTEx)		0.948623	GTEX-132AR-2426-SM-5IFFD	Normal-Tissue(GTEx)		0.659921	TCGA-09-0369-01	Tumor
4	1.214	1.101	1.027	0.596	0.499	0.423	0.503	0.541	0.527					-1.57153e-08	GTEX-WOFM-0526-SM-4OOS2	Normal-Tissue(GTEx)		2.5993	TCGA-IN-7808-01	Tumor		4.73333	TCGA-24-1419-01	Tumor
														-1.57153e-08	GTEX-ZPCL-1426-SM-57WEC	Normal-Tissue(GTEx)		3.4303	TCGA-CG-4466-01	Tumor		1.4489	TCGA-29-1761-01	Tumor
Figure 8g														-1.57153e-08	GTEX-RM2N-0626-SM-48FD6	Normal-Tissue(GTEx)		-1.57153e-08	TCGA-HU-A4GP-11	Normal		1.59457	TCGA-24-1845-01	Tumor
sgNC			sgSMIMP#1			sgSMIMP#2								-1.57153e-08	GTEX-ZYW4-1426-SM-5SIAX	Normal-Tissue(GTEx)		0.782421	TCGA-D7-A4Z0-01	Tumor		2.68261	TCGA-24-2293-01	Tumor
117	112	117	13	14	18	18	16	17						-1.57153e-08	GTEX-12BJ1-1426-SM-5BC5Q	Normal-Tissue(GTEx)		0.432948	TCGA-CG-4462-01	Tumor		0.226513	TCGA-29-A5NZ-01	Tumor
														-1.57153e-08	GTEX-W5WG-1626-SM-4LMKG	Normal-Tissue(GTEx)		1.02858	TCGA-BR-7703-11	Normal		1.33341	TCGA-29-1768-01	Tumor
Figure 8i														-1.57153e-08	GTEX-ZYVF-2526-SM-5E45C	Normal-Tissue(GTEx)		1.72682	TCGA-IN-8663-01	Tumor		0.367373	GTEX-13N11-0526-SM-5IJFI	Normal-Tissue(GTEx)
days	sgNC			sgSMIMP#1			sgSMIMP#2							0.226513	GTEX-POMQ-0626-SM-3P61E	Normal-Tissue(GTEx)		0.344836	GTEX-11EQ9-1226-SM-5987E	Normal-Tissue(GTEx)		4.35967	TCGA-24-1551-01	Tumor
0	0.212	0.183	0.175	0.197	0.199	0.194	0.207	0.195	0.199					0.739854	TCGA-LN-A49Y-01	Tumor		0.0976133	GTEX-RWS6-0926-SM-47JXE	Normal-Tissue(GTEx)		0.432948	GTEX-WWYW-2726-SM-4MVOP	Normal-Tissue(GTEx)
1	0.308	0.296	0.303	0.346	0.32	0.314	0.333	0.33	0.32					-1.57153e-08	GTEX-13PVQ-1926-SM-5L3GN	Normal-Tissue(GTEx)		-1.57153e-08	GTEX-13X6H-1626-SM-5Q5CT	Normal-Tissue(GTEx)		2.40869	TCGA-24-1474-01	Tumor
2	0.49	0.47	0.521	0.416	0.436	0.44	0.441	0.425	0.433					-1.57153e-08	GTEX-13FLV-1226-SM-5IJBZ	Normal-Tissue(GTEx)		-1.57153e-08	GTEX-ZTX8-0426-SM-59HLG	Normal-Tissue(GTEx)		0.124327	TCGA-09-2048-01	Tumor
3	0.694	0.597	0.573	0.483	0.47	0.397	0.516	0.409	0.453					0.356135	GTEX-RUSQ-0926-SM-47JWU	Normal-Tissue(GTEx)		6.13643	TCGA-HU-A4GQ-01	Tumor		3.51219	TCGA-36-1580-01	Tumor
4	1.232	1.144	1.203	0.635	0.66	0.604	0.675	0.612	0.624					-1.57153e-08	GTEX-PWCY-0726-SM-48TCS	Normal-Tissue(GTEx)		3.10939	TCGA-BR-7716-01	Tumor		1.35616	TCGA-61-1900-01	Tumor
														-1.57153e-08	GTEX-11DZ1-2026-SM-5A5KG	Normal-Tissue(GTEx)		1.23264	GTEX-11EM3-1026-SM-5A5KL	Normal-Tissue(GTEx)		0.21412	TCGA-25-2392-01	Tumor
Figure 8j														-1.57153e-08	GTEX-PX3G-0726-SM-48TZT	Normal-Tissue(GTEx)		5.44292	TCGA-BR-8372-01	Tumor		6.07425	TCGA-24-2033-01	Tumor
sgNC				sgSMIMP#1				sgSMIMP#2						-1.57153e-08	GTEX-YB5E-1026-SM-5IFI2	Normal-Tissue(GTEx)		0.799068	TCGA-D7-8579-01	Tumor		3.29281	TCGA-24-1562-01	Tumor
66	59	74	72	1	1	4	1	5	5	5	5			2.57529	TCGA-LN-A8I0-01	Tumor		0.704867	GTEX-S3XE-1026-SM-4AD4O	Normal-Tissue(GTEx)		6.24315	TCGA-61-2110-01	Tumor
														1.6781	TCGA-V5-AASX-11	Normal		3.44755	TCGA-BR-4363-01	Tumor		4.15053	TCGA-23-1113-01	Tumor
Figure 8i														0.344836	GTEX-ZTTD-1426-SM-4YCEX	Normal-Tissue(GTEx)		0.238793	GTEX-ZYY3-1726-SM-5EGH3	Normal-Tissue(GTEx)		6.00925	TCGA-24-2290-01	Tumor
days	sgNC			sgSMIMP#1			sgSMIMP#2							-1.57153e-08	GTEX-WFG8-1026-SM-4LVMZ	Normal-Tissue(GTEx)		4.61591	TCGA-VQ-A91D-01	Tumor		4.62176	TCGA-24-2271-01	Tumor
0	0.129	0.122	0.123	0.116	0.117	0.116	0.119	0.115	0.115					4.88946	TCGA-2H-A9GF-01	Tumor		0.526084	TCGA-BR-7196-01	Tumor		2.91074	TCGA-29-1695-01	Tumor
1	0.262	0.264	0.25	0.217	0.211	0.219	0.213	0.198	0.205					-1.57153e-08	GTEX-11TUW-1226-SM-5GU7C	Normal-Tissue(GTEx)		3.39098	TCGA-BR-6852-01	Tumor		0.475073	GTEX-T5JW-0426-SM-4DM7M	Normal-Tissue(GTEx)
2	0.321	0.367	0.362	0.266	0.253	0.292	0.25	0.273	0.24					0.137501	GTEX-12WSL-1326-SM-5LZVW	Normal-Tissue(GTEx)		3.62998	TCGA-D7-8575-01	Tumor		0.238793	GTEX-11I78-1926-SM-59878	Normal-Tissue(GTEx)
3	1.545	1.761	1.648	1.008	1.026	1.125	0.918	0.913	0.893					-1.57153e-08	GTEX-11I78-1526-SM-5A5K7	Normal-Tissue(GTEx)		2.50077	TCGA-BR-8367-01	Tumor		0.555816	TCGA-25-1328-01	Tumor
4	2.856	2.525	2.474	2.014	1.959	1.911	1.943	1.812	1.544					0.124327	GTEX-XGQ4-1526-SM-4AT6H	Normal-Tissue(GTEx)		3.29128	TCGA-VQ-A91Q-01	Tumor		0.641556	GTEX-133LE-1226-SM-5IFGC	Normal-Tissue(GTEx)
														-1.57153e-08	GTEX-Y5V6-1026-SM-4VBS2	Normal-Tissue(GTEx)		5.76554	TCGA-VQ-A94R-01	Tumor		3.32194	TCGA-13-A5FT-01	Tumor
Figure 8m														0.0703873	TCGA-LN-A4MQ-01	Tumor		2.07037	TCGA-CD-A486-01	Tumor		0.310339	GTEX-13PL7-2326-SM-5L3FY	Normal-Tissue(GTEx)
sgNC			sgSMIMP#1			sgSMIMP#2								-1.57153e-08	GTEX-13G51-0926-SM-5IFFU	Normal-Tissue(GTEx)		-1.57153e-08	GTEX-111YS-1126-SM-5GZYQ	Normal-Tissue(GTEx)		0.367373	TCGA-13-1512-01	Tumor
153	163	150	113	118	100	91	78	91						0.150557	GTEX-ZAB4-1126-SM-5HL86	Normal-Tissue(GTEx)		-1.57153e-08	GTEX-139YR-1926-SM-5LZXM	Normal-Tissue(GTEx)		1.52104	TCGA-23-2078-01	Tumor
														-1.57153e-08	GTEX-ZT9W-1326-SM-51MTB	Normal-Tissue(GTEx)		3.65187	TCGA-VQ-A8PX-01	Tumor		4.82931	TCGA-24-1924-01	Tumor
														2.25395	TCGA-JY-A93E-01	Tumor		2.8699	TCGA-BR-4367-01	Tumor		1.15058	TCGA-13-1496-01	Tumor
														0.111034	GTEX-11P81-0926-SM-59874	Normal-Tissue(GTEx)		0.0703873	TCGA-BR-7722-01	Tumor		-1.57153e-08	GTEX-11ZTS-1926-SM-5CVLA	Normal-Tissue(GTEx)
														0.084067	TCGA-VR-A8EO-01	Tumor		0.536053	TCGA-BR-7851-11	Normal		3.20475	TCGA-04-1514-01	Tumor
														-1.57153e-08	GTEX-ZYT6-1226-SM-5E44Q	Normal-Tissue(GTEx)		2.57287	TCGA-HU-A4GD-01	Tumor		4.16667	TCGA-24-2261-01	Tumor
														0.150557	GTEX-R45C-1226-SM-48FEE	Normal-Tissue(GTEx)		3.2479	TCGA-VQ-A94U-01	Tumor		3.42087	TCGA-36-1571-01	Tumor
														0.344836	GTEX-PWCY-0826-SM-48TCR	Normal-Tissue(GTEx)		3.07725	TCGA-VQ-A8PJ-01	Tumor		-1.57153e-08	GTEX-145ME-1226-SM-5SIB6	Normal-Tissue(GTEx)
														-1.57153e-08	GTEX-NPJ8-1926-SM-3MJGB	Normal-Tissue(GTEx)		4.2502	TCGA-VQ-A8E7-01	Tumor		2.83999	TCGA-04-1530-01	Tumor
														0.0703873	TCGA-VR-A8EX-01	Tumor		1.28094	TCGA-BR-A4J9-01	Tumor		0.422222	TCGA-25-2042-01	Tumor
														0.176318	GTEX-N7MT-0326-SM-48TDP	Normal-Tissue(GTEx)		0.38957	TCGA-HU-A4H5-01	Tumor		4.31328	TCGA-31-1950-01	Tumor
														-1.57153e-08	GTEX-XQ8I-1826-SM-4BOOJ	Normal-Tissue(GTEx)		3.63347	TCGA-RD-A8N6-01	Tumor		3.85603	TCGA-24-1413-01	Tumor
														0.356135	GTEX-1211K-0926-SM-5FQTL	Normal-Tissue(GTEx)		1.41683	TCGA-BR-8291-01	Tumor		1.46991	TCGA-13-1501-01	Tumor
														0.137501	GTEX-R55E-1326-SM-48FCR	Normal-Tissue(GTEx)		1.48029	TCGA-BR-4279-01	Tumor		3.82069	TCGA-25-1630-01	Tumor
														0.137501	GTEX-Z9EW-0526-SM-5HL8S	Normal-Tissue(GTEx)		1.94859	TCGA-VQ-A8P8-01	Tumor		0.83188	TCGA-61-2009-01	Tumor
														1.82785	TCGA-L5-A88T-01	Tumor		2.04612	TCGA-VQ-A928-01	Tumor		0.26304	GTEX-Y114-1726-SM-4TT7U	Normal-Tissue(GTEx)
														-1.57153e-08	GTEX-XV7Q-1026-SM-4BRVR	Normal-Tissue(GTEx)		0.62293	GTEX-OHPK-1526-SM-3MJGM	Normal-Tissue(GTEx)		-1.57153e-08	GTEX-WI4N-2526-SM-4OOSE	Normal-Tissue(GTEx)
														-1.57153e-08	GTEX-12ZZX-1326-SM-5DUWI	Normal-Tissue(GTEx)		0.454178	GTEX-XXEK-0826-SM-4BRWG	Normal-Tissue(GTEx)		0.757041	TCGA-13-0886-01	Tumor
														-1.57153e-08	GTEX-OIZG-1026-SM-3LK5X	Normal-Tissue(GTEx)		0.201631	GTEX-145MO-2226-SM-5Q5BN	Normal-Tissue(GTEx)		3.42495	TCGA-04-1536-01	Tumor
														-1.57153e-08	GTEX-Y3I4-1026-SM-4TT2C	Normal-Tissue(GTEx)		1.65077	TCGA-HF-7131-01	Tumor		2.44623	TCGA-31-1959-01	Tumor
														0.731174	TCGA-LN-A8HZ-01	Tumor		0.38957	GTEX-Y8E4-1526-SM-4WWDI	Normal-Tissue(GTEx)		0.516027	GTEX-RWS6-1026-SM-47JXD	Normal-Tissue(GTEx)
														0.084067	GTEX-P4QS-0726-SM-3NMCZ	Normal-Tissue(GTEx)		0.238793	TCGA-IN-7806-01	Tumor		4.0951	TCGA-24-2023-01	Tumor
														-1.57153e-08	GTEX-145LV-1426-SM-5Q5BV	Normal-Tissue(GTEx)		3.84198	TCGA-BR-8081-01	Tumor		0.757041	TCGA-25-1633-01	Tumor
														0.176318	GTEX-13QJ3-1826-SM-5S2PT	Normal-Tissue(GTEx)		3.29569	TCGA-IN-AB1X-01	Tumor		4.96345	TCGA-25-2396-01	Tumor
														0.201631	GTEX-133LE-0726-SM-5P9IZ	Normal-Tissue(GTEx)		1.10434	TCGA-CG-5722-11	Normal		4.82275	TCGA-13-1410-01	Tumor
														-1.57153e-08	GTEX-13FH7-0626-SM-5KLZD	Normal-Tissue(GTEx)		2.88165	TCGA-VQ-A8PP-01	Tumor		0.21412	TCGA-30-1714-01	Tumor
														0.298665	GTEX-13OVL-2726-SM-5J2MP	Normal-Tissue(GTEx)		2.95045	TCGA-BR-8484-01	Tumor		4.50845	TCGA-23-1026-01	Tumor
														0.150557	GTEX-X3Y1-1226-SM-4PQZ8	Normal-Tissue(GTEx)		3.81251	TCGA-HU-A4G8-01	Tumor		5.50304	TCGA-24-1431-01	Tumor
														-1.57153e-08	GTEX-11UD2-1526-SM-5EQLQ	Normal-Tissue(GTEx)		-1.57153e-08	GTEX-ZYVF-2726-SM-5GID4	Normal-Tissue(GTEx)		1.78662	TCGA-13-0800-01	Tumor
														-1.57153e-08	GTEX-Y8E4-1726-SM-5LU9G	Normal-Tissue(GTEx)		4.73718	TCGA-HU-A4GC-01	Tumor		3.211	TCGA-13-0765-01	Tumor
														-1.57153e-08	GTEX-11UD2-1226-SM-5EQMI	Normal-Tissue(GTEx)		5.60198	TCGA-CG-5726-01	Tumor		2.72469	TCGA-61-1998-01	Tumor
														-1.57153e-08	GTEX-ZP4G-1126-SM-4WWCI	Normal-Tissue(GTEx)		4.30815	TCGA-CD-A48C-01	Tumor		1.97453	TCGA-23-1029-01	Tumor
														-1.57153e-08	GTEX-WXYG-1126-SM-4ONCH	Normal-Tissue(GTEx)		0.238793	GTEX-WYJK-2526-SM-4ONDF	Normal-Tissue(GTEx)		1.72249	GTEX-13QIC-1526-SM-5IJFL	Normal-Tissue(GTEx)
														0.286878	GTEX-V955-1226-SM-4JBI9	Normal-Tissue(GTEx)		-1.57153e-08	GTEX-11P82-0726-SM-5PNYL	Normal-Tissue(GTEx)		1.60879	TCGA-61-2003-01	Tumor
														-1.57153e-08	GTEX-14AS3-0726-SM-5S2NY	Normal-Tissue(GTEx)		1.49568	TCGA-BR-7716-11	Normal		0.422222	TCGA-24-2038-01	Tumor
														0.124327	GTEX-ZZ64-0226-SM-5E44X	Normal-Tissue(GTEx)		6.06026	TCGA-VQ-A8E3-01	Tumor		1.60879	TCGA-09-0366-01	Tumor
														-1.57153e-08	GTEX-11P82-0626-SM-5PNYK	Normal-Tissue(GTEx)		-1.57153e-08	TCGA-HU-A4GH-11	Normal		4.17876	TCGA-30-1862-01	Tumor
														-1.57153e-08	GTEX-RU72-0726-SM-46MUW	Normal-Tissue(GTEx)		1.53104	TCGA-VQ-A8E0-01	Tumor		0.250954	GTEX-YFC4-2726-SM-5IFJW	Normal-Tissue(GTEx)
														5.96762	TCGA-IG-A8O2-01	Tumor		4.73987	TCGA-VQ-A8PO-01	Tumor		3.3757	TCGA-13-0885-01	Tumor
														1.20791	TCGA-Q9-A6FW-01	Tumor		4.33561	TCGA-CD-8526-01	Tumor		3.28392	TCGA-24-1425-01	Tumor
														0.111034	GTEX-ZTPG-1626-SM-5DUX2	Normal-Tissue(GTEx)		1.541	TCGA-CG-5716-01	Tumor		3.4128	TCGA-25-2404-01	Tumor
														-1.57153e-08	GTEX-13PL7-0526-SM-5J2MQ	Normal-Tissue(GTEx)		1.08407	TCGA-VQ-A8DV-01	Tumor		1.23881	TCGA-24-1105-01	Tumor
														-1.57153e-08	GTEX-146FR-0426-SM-5SI97	Normal-Tissue(GTEx)		5.56106	TCGA-FP-A4BF-01	Tumor		5.57535	TCGA-24-1469-01	Tumor
														-1.57153e-08	GTEX-ZVE2-1326-SM-5NQ94	Normal-Tissue(GTEx)		0.669016	TCGA-RD-A8N1-01	Tumor		1.19535	TCGA-13-0795-01	Tumor
														3.0409	TCGA-L5-A4OU-01	Tumor		3.34627	TCGA-BR-8687-01	Tumor		-1.57153e-08	GTEX-13OVJ-2426-SM-5KM3I	Normal-Tissue(GTEx)
														-1.57153e-08	GTEX-11P82-0526-SM-5986P	Normal-Tissue(GTEx)		-1.57153e-08	GTEX-11EI6-2426-SM-5PNVS	Normal-Tissue(GTEx)		0.189038	GTEX-PLZ4-2826-SM-3P617	Normal-Tissue(GTEx)
														4.07637	TCGA-L5-A8NJ-01	Tumor		0.286878	TCGA-BR-8060-11	Normal		5.95532	TCGA-61-1907-01	Tumor
														0.111034	GTEX-ZA64-0626-SM-5HL9O	Normal-Tissue(GTEx)		0.739854	GTEX-13QBU-1126-SM-5LU44	Normal-Tissue(GTEx)		0.26304	GTEX-ZLWG-0926-SM-4WWC3	Normal-Tissue(GTEx)
														-1.57153e-08	GTEX-U3ZN-1826-SM-4DXUY	Normal-Tissue(GTEx)		4.66448	TCGA-BR-4369-01	Tumor		0.286878	TCGA-57-1582-01	Tumor
														-1.57153e-08	GTEX-1399R-0726-SM-5KM2A	Normal-Tissue(GTEx)		-1.57153e-08	GTEX-ZV6S-0926-SM-57WGB	Normal-Tissue(GTEx)		3.98277	TCGA-30-1857-01	Tumor
														0.201631	GTEX-ZZPU-1826-SM-5E43L	Normal-Tissue(GTEx)		0.565594	TCGA-BR-A4IV-01	Tumor		1.72249	TCGA-13-0720-01	Tumor
														0.189038	GTEX-Y3IK-1226-SM-4WWEK	Normal-Tissue(GTEx)		5.88382	TCGA-VQ-A8PH-01	Tumor		4.96761	TCGA-24-1549-01	Tumor
														-1.57153e-08	GTEX-13O21-0826-SM-5J2NU	Normal-Tissue(GTEx)		0.454178	GTEX-WFON-1126-SM-4LVMA	Normal-Tissue(GTEx)		0.696007	TCGA-25-1627-01	Tumor
														-1.57153e-08	GTEX-11DXY-1426-SM-5N9CN	Normal-Tissue(GTEx)		2.11102	TCGA-VQ-A91N-01	Tumor		1.02858	GTEX-PWN1-2426-SM-48TDD	Normal-Tissue(GTEx)
														-1.57153e-08	GTEX-OIZI-1426-SM-3NB1T	Normal-Tissue(GTEx)		3.24181	TCGA-RD-A8NB-01	Tumor		4.16988	TCGA-24-0979-01	Tumor
														-1.57153e-08	GTEX-ZYFC-1726-SM-5GZYX	Normal-Tissue(GTEx)		0.978174	GTEX-OOBJ-1526-SM-3NB1Q	Normal-Tissue(GTEx)		5.20277	TCGA-24-0966-01	Tumor
														-1.57153e-08	GTEX-RVPV-0526-SM-47JYL	Normal-Tissue(GTEx)		0.176318	GTEX-12BJ1-1726-SM-5HL9B	Normal-Tissue(GTEx)		0.356135	GTEX-13PVR-1226-SM-5RQJ2	Normal-Tissue(GTEx)
														-1.57153e-08	GTEX-11P7K-1426-SM-5EGKY	Normal-Tissue(GTEx)		0.150557	GTEX-XAJ8-0326-SM-47JYI	Normal-Tissue(GTEx)		3.3089	TCGA-24-2026-01	Tumor
														0.111034	GTEX-Y8LW-0726-SM-5IFI1	Normal-Tissue(GTEx)		1.32769	TCGA-BR-8059-01	Tumor		1.45944	TCGA-04-1331-01	Tumor
														0.378503	GTEX-11ZTS-2726-SM-5EQLU	Normal-Tissue(GTEx)		4.22803	TCGA-CD-8527-01	Tumor		2.69376	TCGA-25-1628-01	Tumor
														-1.57153e-08	GTEX-OIZG-0926-SM-3LK5Y	Normal-Tissue(GTEx)		3.78448	TCGA-BR-8286-01	Tumor		4.20788	TCGA-13-1495-01	Tumor
														-1.57153e-08	TCGA-R6-A6XQ-01	Tumor		2.03915	TCGA-IN-A7NT-01	Tumor		2.44362	TCGA-29-1763-01	Tumor
														-1.57153e-08	GTEX-QDVJ-0726-SM-48U1W	Normal-Tissue(GTEx)		1.48543	TCGA-BR-A4J6-01	Tumor		4.55218	TCGA-24-1418-01	Tumor
														0.411425	TCGA-IG-A5B8-01	Tumor		0.0976133	TCGA-BR-6801-01	Tumor		1.6369	TCGA-61-2111-01	Tumor
														-1.57153e-08	GTEX-144GM-1626-SM-5O9AG	Normal-Tissue(GTEx)		0.722454	GTEX-XBED-1226-SM-4AT5V	Normal-Tissue(GTEx)		0.411425	TCGA-24-1553-01	Tumor
														-1.57153e-08	GTEX-X4EP-1626-SM-4QAS6	Normal-Tissue(GTEx)		0.321936	GTEX-T6MO-0726-SM-4DM58	Normal-Tissue(GTEx)		2.92975	TCGA-04-1648-01	Tumor
														-1.57153e-08	GTEX-ZF2S-1326-SM-4WWAZ	Normal-Tissue(GTEx)		-1.57153e-08	GTEX-OIZH-1526-SM-3NB1J	Normal-Tissue(GTEx)		4.51725	TCGA-13-0884-01	Tumor
														-1.57153e-08	GTEX-ZYVF-2326-SM-5E44Z	Normal-Tissue(GTEx)		0.201631	GTEX-RM2N-0826-SM-48FD3	Normal-Tissue(GTEx)		5.06094	TCGA-61-2097-01	Tumor
														-1.57153e-08	GTEX-13U4I-1326-SM-5KM25	Normal-Tissue(GTEx)		1.47509	TCGA-R5-A805-01	Tumor		2.1635	TCGA-24-1930-01	Tumor
														-1.57153e-08	GTEX-QXCU-1126-SM-48FE5	Normal-Tissue(GTEx)		0.475073	GTEX-13RTK-0226-SM-5RQHR	Normal-Tissue(GTEx)		1.07726	TCGA-24-1567-01	Tumor
														0.137501	GTEX-ZAB5-1026-SM-5HL91	Normal-Tissue(GTEx)		3.37154	TCGA-D7-A74A-01	Tumor		6.09573	TCGA-09-0367-01	Tumor
														2.60883	TCGA-L5-A88Y-01	Tumor		4.70985	TCGA-BR-8591-01	Tumor		0.238793	GTEX-11ZVC-1426-SM-5EGGA	Normal-Tissue(GTEx)
														-1.57153e-08	GTEX-UPK5-1226-SM-4IHL8	Normal-Tissue(GTEx)		3.5173	TCGA-BR-8677-01	Tumor		4.33124	TCGA-61-1736-01	Tumor
														5.32413	TCGA-RE-A7BO-01	Tumor		4.07129	TCGA-VQ-AA6A-01	Tumor		0.201631	TCGA-61-1737-01	Tumor
														3.1293	TCGA-JY-A6FE-01	Tumor		0.823748	TCGA-D7-6525-01	Tumor		0.545956	TCGA-30-1853-01	Tumor
														3.69381	TCGA-L5-A8NL-01	Tumor		2.71145	TCGA-IN-A6RO-01	Tumor		-1.57153e-08	GTEX-11EMC-1726-SM-5H11P	Normal-Tissue(GTEx)
														-1.57153e-08	GTEX-P4PQ-0726-SM-3NMCR	Normal-Tissue(GTEx)		0.0565848	TCGA-B7-A5TK-01	Tumor		3.78661	TCGA-24-1604-01	Tumor
														-1.57153e-08	GTEX-11NSD-1226-SM-5986Q	Normal-Tissue(GTEx)		2.67586	TCGA-BR-8381-01	Tumor		5.96073	TCGA-13-1409-01	Tumor
														-1.57153e-08	GTEX-1192X-1826-SM-5GIE2	Normal-Tissue(GTEx)		1.31036	TCGA-CG-4301-01	Tumor		3.89722	TCGA-10-0928-01	Tumor
														-1.57153e-08	GTEX-ZPCL-1226-SM-4WWFF	Normal-Tissue(GTEx)		2.37291	TCGA-BR-4371-01	Tumor		0.150557	GTEX-QCQG-1426-SM-48U22	Normal-Tissue(GTEx)
														0.163501	GTEX-T6MN-1526-SM-4DM5P	Normal-Tissue(GTEx)		0.584968	TCGA-VQ-A94P-01	Tumor		-1.57153e-08	TCGA-30-1892-01	Tumor
														-1.57153e-08	GTEX-YFCO-0526-SM-4W1ZJ	Normal-Tissue(GTEx)		2.7634	TCGA-D7-6521-01	Tumor		2.55094	TCGA-24-1104-01	Tumor
														2.08067	TCGA-VR-A8Q7-01	Tumor		4.30597	TCGA-HF-A5NB-01	Tumor		6.06243	TCGA-23-1021-01	Tumor
														0.21412	GTEX-R55D-1126-SM-48FEB	Normal-Tissue(GTEx)		1.59457	TCGA-CG-4440-01	Tumor		0.163501	GTEX-X8HC-2726-SM-46MUA	Normal-Tissue(GTEx)
														-1.57153e-08	GTEX-11OF3-2226-SM-5986F	Normal-Tissue(GTEx)		-1.57153e-08	GTEX-S4P3-0726-SM-4AD57	Normal-Tissue(GTEx)		5.93023	TCGA-10-0927-01	Tumor
														0.163501	TCGA-Z6-A9VB-01	Tumor		0.298665	GTEX-13CF3-1926-SM-5K7WF	Normal-Tissue(GTEx)		5.02196	TCGA-24-1923-01	Tumor
														0.111034	GTEX-YECK-1726-SM-5IFI3	Normal-Tissue(GTEx)		-1.57153e-08	TCGA-D7-A747-01	Tumor		0.321936	GTEX-OHPK-2426-SM-3MJGH	Normal-Tissue(GTEx)
														0.422222	GTEX-ZPIC-1926-SM-57WFQ	Normal-Tissue(GTEx)		0.344836	GTEX-P78B-1826-SM-3P5YX	Normal-Tissue(GTEx)		2.94114	TCGA-24-0968-01	Tumor
														0.422222	GTEX-REY6-1426-SM-48FDK	Normal-Tissue(GTEx)		0.799068	GTEX-V955-1326-SM-4JBHR	Normal-Tissue(GTEx)		-1.57153e-08	GTEX-TSE9-2226-SM-4DXUR	Normal-Tissue(GTEx)
														-1.57153e-08	GTEX-WXYG-1026-SM-4ONCD	Normal-Tissue(GTEx)		0.0976133	GTEX-11GSP-2126-SM-5HL5E	Normal-Tissue(GTEx)		2.22958	TCGA-13-0726-01	Tumor
														0.150557	GTEX-ZYY3-1626-SM-5EGJF	Normal-Tissue(GTEx)		4.25323	TCGA-D7-A6EV-01	Tumor		0.74845	TCGA-25-1329-01	Tumor
														-1.57153e-08	GTEX-117YW-2026-SM-5N9BH	Normal-Tissue(GTEx)		0.201631	GTEX-ZZ64-0426-SM-5E43F	Normal-Tissue(GTEx)		5.09975	TCGA-13-0916-01	Tumor
														-1.57153e-08	GTEX-ZTSS-0626-SM-59867	Normal-Tissue(GTEx)		2.04264	TCGA-RD-A8N0-01	Tumor		0.275004	GTEX-S32W-1226-SM-4AD67	Normal-Tissue(GTEx)
														0.150557	GTEX-RWS6-0726-SM-47JXI	Normal-Tissue(GTEx)		3.42631	TCGA-MX-A666-01	Tumor		2.98185	TCGA-29-1781-01	Tumor
														-1.57153e-08	GTEX-ZDTT-1226-SM-4WKG9	Normal-Tissue(GTEx)		0.400527	GTEX-13D11-2126-SM-5IFH2	Normal-Tissue(GTEx)		5.08024	TCGA-25-1312-01	Tumor
														1.79494	TCGA-L5-A8NK-01	Tumor		4.74526	TCGA-CD-5800-01	Tumor		2.51602	TCGA-13-0906-01	Tumor
														0.137501	GTEX-13FTX-0526-SM-5IFGS	Normal-Tissue(GTEx)		5.37642	TCGA-SW-A7EA-01	Tumor		4.67467	TCGA-29-1770-01	Tumor
														0.163501	GTEX-P78B-1126-SM-3P615	Normal-Tissue(GTEx)		2.73556	TCGA-BR-8364-01	Tumor		2.3477	TCGA-36-1576-01	Tumor
														4.5789	TCGA-L5-A8NR-01	Tumor		2.0566	TCGA-CD-A489-01	Tumor		0.422222	TCGA-20-1687-01	Tumor
														0.286878	GTEX-XYKS-1026-SM-4BRVH	Normal-Tissue(GTEx)		1.40055	TCGA-VQ-AA68-01	Tumor		1.45944	TCGA-25-1316-01	Tumor
														-1.57153e-08	GTEX-13PVQ-1726-SM-5IFF3	Normal-Tissue(GTEx)		2.22344	TCGA-CG-4475-01	Tumor		-1.57153e-08	GTEX-XUZC-1026-SM-4BOPY	Normal-Tissue(GTEx)
														0.21412	GTEX-QCQG-0626-SM-48U21	Normal-Tissue(GTEx)		0.111034	GTEX-ZVT3-2126-SM-59HL2	Normal-Tissue(GTEx)		3.66108	TCGA-13-2060-01	Tumor
														-1.57153e-08	GTEX-11OF3-2326-SM-5GU73	Normal-Tissue(GTEx)		4.86193	TCGA-CG-5723-01	Tumor		0.839938	TCGA-09-1668-01	Tumor
														-1.57153e-08	GTEX-1399S-1326-SM-5P9GH	Normal-Tissue(GTEx)		2.25704	TCGA-D7-6519-01	Tumor		6.856	TCGA-04-1350-01	Tumor
														-1.57153e-08	GTEX-VUSG-1126-SM-4KKZQ	Normal-Tissue(GTEx)		0.687044	TCGA-VQ-A8PE-01	Tumor		2.55094	TCGA-23-1028-01	Tumor
														0.137501	GTEX-RTLS-1126-SM-46MUQ	Normal-Tissue(GTEx)		0.042644	TCGA-HU-A4HB-11	Normal		6.04332	TCGA-04-1655-01	Tumor
														0.201631	GTEX-P78B-1026-SM-3NMC4	Normal-Tissue(GTEx)		3.18587	TCGA-BR-8382-01	Tumor		6.06824	TCGA-25-2400-01	Tumor
														-1.57153e-08	GTEX-X4EO-1226-SM-4QARR	Normal-Tissue(GTEx)		2.57287	TCGA-BR-7715-01	Tumor		5.19499	TCGA-24-1842-01	Tumor
														-1.57153e-08	GTEX-T2YK-1326-SM-4DM6S	Normal-Tissue(GTEx)		2.33053	TCGA-VQ-A94O-01	Tumor		3.99092	TCGA-04-1364-01	Tumor
														0.124327	GTEX-XBEW-1526-SM-4AT4K	Normal-Tissue(GTEx)		2.12434	TCGA-RD-A8MW-01	Tumor		1.13748	TCGA-23-1027-01	Tumor
														-1.57153e-08	GTEX-S4Q7-0526-SM-4AD5N	Normal-Tissue(GTEx)		0.963466	GTEX-P4PP-1526-SM-3P61M	Normal-Tissue(GTEx)		-1.57153e-08	GTEX-WEY5-0626-SM-4LMIA	Normal-Tissue(GTEx)
														1.04263	TCGA-L5-A4OO-01	Tumor		-1.57153e-08	GTEX-12696-1726-SM-5EQLH	Normal-Tissue(GTEx)		3.04617	TCGA-23-2084-01	Tumor
														-1.57153e-08	GTEX-XXEK-0526-SM-4BRWD	Normal-Tissue(GTEx)		4.90299	TCGA-VQ-A8PB-01	Tumor		2.74849	TCGA-13-0766-01	Tumor
														3.39777	TCGA-L5-A8NE-01	Tumor		1.6135	TCGA-CG-5717-01	Tumor		1.24487	TCGA-29-1705-01	Tumor
														-1.57153e-08	GTEX-13PVR-1826-SM-5Q5CC	Normal-Tissue(GTEx)		0.21412	GTEX-ZEX8-1626-SM-4WKG7	Normal-Tissue(GTEx)		3.96807	TCGA-24-1423-01	Tumor
														-1.57153e-08	GTEX-ZQUD-0626-SM-51MR2	Normal-Tissue(GTEx)		0.344836	TCGA-BR-A4J8-01	Tumor		2.83191	TCGA-23-1114-01	Tumor
														-1.57153e-08	GTEX-XUZC-0526-SM-4BOPF	Normal-Tissue(GTEx)		2.43832	TCGA-BR-4191-01	Tumor		4.4087	TCGA-13-0727-01	Tumor
														-1.57153e-08	GTEX-Y9LG-0926-SM-4VDS6	Normal-Tissue(GTEx)		0.0976133	GTEX-12WSJ-0926-SM-5P9JD	Normal-Tissue(GTEx)		-1.57153e-08	TCGA-24-1435-01	Tumor
														-1.57153e-08	GTEX-11O72-2026-SM-5N9G8	Normal-Tissue(GTEx)		0.400527	TCGA-RD-A8N4-01	Tumor		3.95702	TCGA-57-1583-01	Tumor
														3.75593	TCGA-L5-A8NT-01	Tumor		-1.57153e-08	GTEX-13111-1226-SM-5GCNC	Normal-Tissue(GTEx)		2.49057	TCGA-09-1659-01	Tumor
														-1.57153e-08	GTEX-12C56-1126-SM-5FQTO	Normal-Tissue(GTEx)		0.910726	GTEX-QV31-0626-SM-447C5	Normal-Tissue(GTEx)		0.641556	TCGA-59-2363-01	Tumor
														-1.57153e-08	GTEX-13U4I-1126-SM-5LU3S	Normal-Tissue(GTEx)		1.66903	TCGA-VQ-AA6J-01	Tumor		0.475073	TCGA-24-1546-01	Tumor
														0.042644	TCGA-IG-A3YA-01	Tumor		0.555816	GTEX-SNMC-0626-SM-4DM6H	Normal-Tissue(GTEx)		2.58012	TCGA-13-1505-01	Tumor
														-1.57153e-08	GTEX-YFC4-1226-SM-5LU9R	Normal-Tissue(GTEx)		0.275004	TCGA-D7-A748-01	Tumor		0.226513	GTEX-1399S-2126-SM-5J2MH	Normal-Tissue(GTEx)
														3.74306	TCGA-L5-A8NW-01	Tumor		0.124327	TCGA-BR-4294-01	Tumor		3.6702	TCGA-25-1315-01	Tumor
														0.150557	GTEX-Y111-1626-SM-57WCY	Normal-Tissue(GTEx)		0.722454	GTEX-14BMV-2226-SM-5RQHX	Normal-Tissue(GTEx)		5.37505	TCGA-24-1430-01	Tumor
														-1.57153e-08	GTEX-14C5O-1726-SM-5RQI9	Normal-Tissue(GTEx)		-1.57153e-08	TCGA-HU-A4H0-01	Tumor		0.443614	GTEX-ZVT3-2626-SM-5GU5L	Normal-Tissue(GTEx)
														0.084067	GTEX-WK11-1026-SM-4OOS8	Normal-Tissue(GTEx)		0.76554	TCGA-IN-A7NR-01	Tumor		3.0215	TCGA-29-1762-01	Tumor
														0.137501	GTEX-13FLV-1326-SM-5L3EJ	Normal-Tissue(GTEx)		0.137501	TCGA-HU-A4HD-01	Tumor		4.35967	TCGA-29-1783-01	Tumor
														0.422222	TCGA-VR-A8ER-01	Tumor		3.00896	TCGA-CG-5718-01	Tumor		2.14728	TCGA-10-0938-01	Tumor
														-1.57153e-08	GTEX-11DYG-1926-SM-5H12I	Normal-Tissue(GTEx)		0.411425	GTEX-XQ8I-2026-SM-4BOOL	Normal-Tissue(GTEx)		2.14078	TCGA-30-1718-01	Tumor
														-1.57153e-08	GTEX-WHSE-1526-SM-4M1XH	Normal-Tissue(GTEx)		1.02146	TCGA-FP-7998-01	Tumor		0.189038	TCGA-24-2280-01	Tumor
														3.16834	TCGA-R6-A8W5-01	Tumor		2.26004	TCGA-BR-8679-01	Tumor		0.422222	TCGA-30-1866-01	Tumor
														0.475073	TCGA-L7-A56G-01	Tumor		0.124327	GTEX-S4Z8-1226-SM-4AD6W	Normal-Tissue(GTEx)		0.584968	GTEX-13W3W-1526-SM-5LU5I	Normal-Tissue(GTEx)
														0.0976133	GTEX-OIZH-0626-SM-3NB1L	Normal-Tissue(GTEx)		2.4195	TCGA-CG-4304-01	Tumor		0.084067	TCGA-24-1846-01	Tumor
														3.11434	TCGA-L5-A4OX-01	Tumor		4.30236	TCGA-VQ-A925-01	Tumor		2.42227	TCGA-24-1552-01	Tumor
														-1.57153e-08	GTEX-13X6K-2126-SM-5O9D4	Normal-Tissue(GTEx)		1.257	TCGA-BR-7717-11	Normal		0.238793	TCGA-13-1477-01	Tumor
														0.084067	GTEX-PLZ5-0826-SM-3P5ZW	Normal-Tissue(GTEx)		3.09763	TCGA-HU-A4H8-01	Tumor		1.21411	TCGA-20-0987-01	Tumor
														5.17632	TCGA-V5-A7RB-01	Tumor		1.18905	GTEX-PWN1-1526-SM-48TDA	Normal-Tissue(GTEx)		4.57957	TCGA-59-2355-01	Tumor
														2.88943	TCGA-L5-A8NS-01	Tumor		0.485434	GTEX-139D8-2326-SM-5IFGE	Normal-Tissue(GTEx)		2.19851	TCGA-57-1993-01	Tumor
														0.250954	GTEX-X4XY-1726-SM-46MVO	Normal-Tissue(GTEx)		4.98456	TCGA-D7-6528-01	Tumor		4.28983	TCGA-57-1994-01	Tumor
														-1.57153e-08	GTEX-WQUQ-1626-SM-4OOSH	Normal-Tissue(GTEx)		0.286878	GTEX-QXCU-1926-SM-48FE4	Normal-Tissue(GTEx)		0.150557	GTEX-UJHI-1226-SM-4IHLR	Normal-Tissue(GTEx)
														-1.57153e-08	GTEX-11P82-0426-SM-5HL5D	Normal-Tissue(GTEx)		1.04965	TCGA-CG-5730-11	Normal		3.20163	TCGA-29-1766-01	Tumor
														2.73556	TCGA-L5-A8NH-01	Tumor		4.00723	TCGA-HU-A4H4-01	Tumor		0.722454	TCGA-36-1581-01	Tumor
														-1.57153e-08	GTEX-13OVJ-1426-SM-5K7Z2	Normal-Tissue(GTEx)		2.89921	TCGA-BR-8058-01	Tumor		4.62003	TCGA-24-1557-01	Tumor
														-1.57153e-08	GTEX-13111-0926-SM-5DUVQ	Normal-Tissue(GTEx)		-1.57153e-08	GTEX-WFJO-1126-SM-4LVLZ	Normal-Tissue(GTEx)		0.856001	TCGA-24-1426-01	Tumor
														-1.57153e-08	GTEX-OOBK-0625-SM-3LK5P	Normal-Tissue(GTEx)		1.18905	TCGA-BR-6454-11	Normal		4.13666	TCGA-24-1844-01	Tumor
														-1.57153e-08	GTEX-12WSK-1326-SM-5CVNM	Normal-Tissue(GTEx)		3.78448	TCGA-CD-8534-01	Tumor		1.68257	TCGA-29-2414-01	Tumor
														0.0976133	GTEX-11TT1-0526-SM-5P9JO	Normal-Tissue(GTEx)		3.79394	TCGA-BR-8368-01	Tumor		5.61354	TCGA-24-1558-01	Tumor
														-1.57153e-08	GTEX-14C38-2126-SM-5RQJO	Normal-Tissue(GTEx)		2.00718	TCGA-BR-8284-01	Tumor		0.807361	TCGA-09-1665-01	Tumor
														-1.57153e-08	GTEX-S33H-0826-SM-4AD5Y	Normal-Tissue(GTEx)		0.815589	TCGA-FP-7916-01	Tumor		3.28689	TCGA-24-1928-01	Tumor
														0.464679	TCGA-L5-A4OG-11	Normal		2.82778	TCGA-VQ-A8P3-01	Tumor		-1.57153e-08	TCGA-25-1870-01	Tumor
														-1.57153e-08	GTEX-11WQK-1826-SM-5EQM2	Normal-Tissue(GTEx)		1.55087	TCGA-CG-4438-01	Tumor		3.90114	TCGA-09-1661-01	Tumor
														-1.57153e-08	GTEX-1212Z-2026-SM-5N9EA	Normal-Tissue(GTEx)		1.18271	TCGA-BR-7957-01	Tumor		3.75491	TCGA-24-1565-01	Tumor
														-1.57153e-08	GTEX-ZDYS-0926-SM-4WWCS	Normal-Tissue(GTEx)		0.713697	GTEX-QCQG-0526-SM-48U2A	Normal-Tissue(GTEx)		1.32769	TCGA-13-1498-01	Tumor
														0.084067	GTEX-147F3-0826-SM-5NQA7	Normal-Tissue(GTEx)		3.87186	TCGA-CG-4444-01	Tumor		4.62176	TCGA-20-1686-01	Tumor
														0.124327	GTEX-YJ8O-0326-SM-5RQJW	Normal-Tissue(GTEx)		5.29352	TCGA-F1-6177-01	Tumor		6.04066	TCGA-04-1362-01	Tumor
														-1.57153e-08	GTEX-11P7K-1326-SM-5BC5G	Normal-Tissue(GTEx)		3.65648	TCGA-FP-8211-01	Tumor		3.19531	TCGA-61-1911-01	Tumor
														-1.57153e-08	GTEX-RU72-0826-SM-46MUS	Normal-Tissue(GTEx)		2.56314	TCGA-CG-4306-01	Tumor		0.367373	GTEX-T2IS-2026-SM-4DM6W	Normal-Tissue(GTEx)
														0.298665	GTEX-X8HC-1326-SM-46MWB	Normal-Tissue(GTEx)		2.44623	TCGA-VQ-AA64-01	Tumor		3.15218	TCGA-20-0991-01	Tumor
														-1.57153e-08	GTEX-11XUK-0926-SM-5EQL3	Normal-Tissue(GTEx)		0.084067	TCGA-HU-A4GN-11	Normal		5.04871	TCGA-30-1861-01	Tumor
														-1.57153e-08	GTEX-ZQUD-0326-SM-4YCEN	Normal-Tissue(GTEx)		1.2265	TCGA-D7-6818-01	Tumor		1.22032	GTEX-11ZTT-1826-SM-5CVLN	Normal-Tissue(GTEx)
														-1.57153e-08	GTEX-PWN1-0726-SM-48TDR	Normal-Tissue(GTEx)		0.238793	GTEX-YFCO-0826-SM-5LUAG	Normal-Tissue(GTEx)		0.879716	TCGA-24-2289-01	Tumor
														-1.57153e-08	TCGA-L5-A43J-01	Tumor		3.03036	TCGA-BR-4370-01	Tumor		0.163501	GTEX-ZV6S-1426-SM-59HKX	Normal-Tissue(GTEx)
														-1.57153e-08	GTEX-YB5K-0626-SM-5LUB5	Normal-Tissue(GTEx)		0.722454	TCGA-D7-8570-01	Tumor		1.43827	TCGA-23-1122-01	Tumor
														-1.57153e-08	GTEX-13FHP-1526-SM-5IJGE	Normal-Tissue(GTEx)		0.298665	TCGA-IN-8663-11	Normal		3.74954	TCGA-36-1574-01	Tumor
														-1.57153e-08	GTEX-ZVZP-1426-SM-5NQ7R	Normal-Tissue(GTEx)		0.238793	GTEX-WHSB-1226-SM-4M1XR	Normal-Tissue(GTEx)		3.41552	TCGA-25-1623-01	Tumor
														-1.57153e-08	GTEX-13S86-0726-SM-5Q5DH	Normal-Tissue(GTEx)		1.64614	TCGA-HU-A4HB-01	Tumor		2.37849	TCGA-29-1774-01	Tumor
														2.27201	TCGA-V5-A7RE-01	Tumor		5.07811	TCGA-BR-A4CS-01	Tumor		4.14892	TCGA-24-1843-01	Tumor
														0.310339	GTEX-11VI4-0526-SM-5EQ48	Normal-Tissue(GTEx)		0.298665	GTEX-NFK9-1526-SM-3LK7B	Normal-Tissue(GTEx)		0.163501	GTEX-13D11-1126-SM-5KLYS	Normal-Tissue(GTEx)
														-1.57153e-08	GTEX-132NY-2026-SM-5L3FM	Normal-Tissue(GTEx)		4.61764	TCGA-IN-A6RR-01	Tumor		3.89527	TCGA-29-1785-01	Tumor
														0.344836	GTEX-ZYFC-2226-SM-5NQ96	Normal-Tissue(GTEx)		3.73983	TCGA-BR-8080-01	Tumor		0.238793	GTEX-XV7Q-1426-SM-4BRWA	Normal-Tissue(GTEx)
														4.24565	TCGA-2H-A9GI-01	Tumor		-1.57153e-08	GTEX-132QS-1826-SM-5IFFN	Normal-Tissue(GTEx)		2.65538	TCGA-25-1632-01	Tumor
														-1.57153e-08	GTEX-WRHK-0426-SM-4MVOG	Normal-Tissue(GTEx)		0.903017	TCGA-CG-5734-11	Normal		5.18663	TCGA-23-1111-01	Tumor
														-1.57153e-08	GTEX-13O3P-1326-SM-5K7Y8	Normal-Tissue(GTEx)		1.79907	TCGA-VQ-A91V-01	Tumor		5.08578	TCGA-29-2425-01	Tumor
														-1.57153e-08	GTEX-X15G-1026-SM-4PQZF	Normal-Tissue(GTEx)		1.20791	TCGA-B7-A5TI-01	Tumor		4.83896	TCGA-10-0937-01	Tumor
														-1.57153e-08	GTEX-11WQK-2226-SM-5CVL7	Normal-Tissue(GTEx)		1.50078	TCGA-VQ-AA6K-01	Tumor		0.83188	TCGA-36-1569-01	Tumor
														0.879716	TCGA-Z6-A8JD-01	Tumor		0.176318	GTEX-ZQUD-0826-SM-57WDQ	Normal-Tissue(GTEx)		4.08832	TCGA-59-A5PD-01	Tumor
														0.201631	GTEX-XBED-1126-SM-48TCF	Normal-Tissue(GTEx)		2.91837	TCGA-VQ-A923-01	Tumor		0.815589	TCGA-29-2427-01	Tumor
														-1.57153e-08	GTEX-ZZ64-0326-SM-5E45S	Normal-Tissue(GTEx)		4.03999	TCGA-BR-8373-01	Tumor		0.74845	TCGA-25-1635-01	Tumor
														0.124327	GTEX-12WSA-1426-SM-5EGJU	Normal-Tissue(GTEx)		2.62063	TCGA-HU-A4H2-01	Tumor		0.321936	GTEX-T6MO-1126-SM-4DM5D	Normal-Tissue(GTEx)
														0.475073	TCGA-LN-A4A5-01	Tumor		0.76554	GTEX-XUZC-0726-SM-4BOPH	Normal-Tissue(GTEx)		0.182692	TCGA-23-1023-01	Tumor
														0.38957	GTEX-ZQUD-0426-SM-57WFR	Normal-Tissue(GTEx)		0.731174	TCGA-BR-7901-01	Tumor		-1.57153e-08	TCGA-30-1891-01	Tumor
														-1.57153e-08	GTEX-ZY6K-0626-SM-59HJL	Normal-Tissue(GTEx)		0.59455	TCGA-CD-8529-01	Tumor		1.20791	TCGA-25-2401-01	Tumor
														1.31616	TCGA-R6-A6Y0-01	Tumor		0.575314	GTEX-13O21-0926-SM-5IFGT	Normal-Tissue(GTEx)		0.704867	GTEX-XYKS-1726-SM-4E3IO	Normal-Tissue(GTEx)
														-1.57153e-08	GTEX-11ZTS-2626-SM-5EGIC	Normal-Tissue(GTEx)		2.95794	TCGA-BR-4280-01	Tumor		-1.57153e-08	GTEX-Y3IK-2026-SM-4YCDG	Normal-Tissue(GTEx)
														-1.57153e-08	GTEX-11NSD-1126-SM-5N9BQ	Normal-Tissue(GTEx)		0.536053	GTEX-13113-0726-SM-5LZUF	Normal-Tissue(GTEx)		4.70322	TCGA-04-1519-01	Tumor
														0.084067	GTEX-13FHP-1626-SM-5N9FK	Normal-Tissue(GTEx)		1.71372	TCGA-CD-A4MG-01	Tumor		1.51096	TCGA-04-1651-01	Tumor
														0.137501	GTEX-Y3I4-0926-SM-4TT2B	Normal-Tissue(GTEx)		0.722454	TCGA-BR-8296-01	Tumor		5.03126	TCGA-23-1809-01	Tumor
														0.137501	GTEX-ZG7Y-1326-SM-4WWBL	Normal-Tissue(GTEx)		0.59455	TCGA-BR-6565-01	Tumor		3.82989	TCGA-24-1103-01	Tumor
														-1.57153e-08	GTEX-14BIN-2726-SM-5RQIE	Normal-Tissue(GTEx)		0.807361	GTEX-S4Q7-0726-SM-4AD5F	Normal-Tissue(GTEx)		4.92881	TCGA-13-0887-01	Tumor
														-1.57153e-08	GTEX-ZAK1-1826-SM-5HL93	Normal-Tissue(GTEx)		2.45939	TCGA-IN-A6RI-01	Tumor		0.575314	TCGA-24-2262-01	Tumor
														0.084067	GTEX-ZGAY-1126-SM-4WWBS	Normal-Tissue(GTEx)		0.0703873	TCGA-IP-7968-11	Normal		-1.57153e-08	GTEX-S341-0726-SM-4AD5R	Normal-Tissue(GTEx)
														1.23264	TCGA-IG-A4QS-01	Tumor		0.226513	GTEX-11NUK-2426-SM-5BC4U	Normal-Tissue(GTEx)		1.23264	TCGA-20-1682-01	Tumor
														0.286878	GTEX-14BMU-1026-SM-5RQJ5	Normal-Tissue(GTEx)		0.856001	TCGA-HU-8608-01	Tumor		1.47509	TCGA-25-2409-01	Tumor
														-1.57153e-08	GTEX-X5EB-1026-SM-46MVU	Normal-Tissue(GTEx)		0.76554	TCGA-BR-8365-01	Tumor		3.83389	TCGA-23-1119-01	Tumor
														4.34416	TCGA-R6-A6DQ-01	Tumor		3.69935	TCGA-HU-A4H6-01	Tumor		0.713697	TCGA-24-1470-01	Tumor
														-1.57153e-08	GTEX-YJ89-1526-SM-5P9IR	Normal-Tissue(GTEx)		4.95464	TCGA-RD-A7C1-01	Tumor		0.189038	GTEX-W5WG-0926-SM-4RTX9	Normal-Tissue(GTEx)
														4.3111	TCGA-2H-A9GQ-01	Tumor		0.575314	TCGA-D7-8574-01	Tumor		0.999979	TCGA-24-1550-01	Tumor
														-1.57153e-08	GTEX-U3ZH-1026-SM-4DXUZ	Normal-Tissue(GTEx)		0.124327	TCGA-RD-A7BW-01	Tumor		1.70046	TCGA-24-1603-01	Tumor
														-1.57153e-08	GTEX-12696-1426-SM-5EGJ6	Normal-Tissue(GTEx)		0.150557	GTEX-YJ8A-1526-SM-5P9FT	Normal-Tissue(GTEx)		4.31471	TCGA-23-1123-01	Tumor
														0.226513	GTEX-S341-0526-SM-4AD5U	Normal-Tissue(GTEx)		0.722454	TCGA-HU-8238-11	Normal		3.85603	TCGA-25-1322-01	Tumor
														0.0976133	TCGA-KH-A6WC-01	Tumor		0.0565848	TCGA-IN-AB1V-11	Normal		0.26304	GTEX-11DXX-1426-SM-5GIDU	Normal-Tissue(GTEx)
														-1.57153e-08	GTEX-XQ3S-1126-SM-4BOPK	Normal-Tissue(GTEx)		0.422222	GTEX-14BMU-1126-SM-5RQJ8	Normal-Tissue(GTEx)		-1.57153e-08	GTEX-P78B-1926-SM-3P616	Normal-Tissue(GTEx)
														-1.57153e-08	GTEX-Y114-1126-SM-4TT7V	Normal-Tissue(GTEx)		0.839938	GTEX-Q2AH-1126-SM-48TZM	Normal-Tissue(GTEx)		0.250954	TCGA-61-2098-01	Tumor
														0.0703873	GTEX-OXRN-1726-SM-3NM9B	Normal-Tissue(GTEx)		-1.57153e-08	GTEX-P4PQ-1526-SM-3NMCK	Normal-Tissue(GTEx)		0.400527	TCGA-24-2024-01	Tumor
														-1.57153e-08	GTEX-13QJ3-1926-SM-5QGQM	Normal-Tissue(GTEx)		1.02858	TCGA-BR-7704-01	Tumor		2.91837	TCGA-13-0724-01	Tumor
														-1.57153e-08	GTEX-PLZ6-0526-SM-3P61C	Normal-Tissue(GTEx)		1.01436	TCGA-FP-8209-01	Tumor		2.31324	TCGA-24-2027-01	Tumor
														-1.57153e-08	GTEX-WQUQ-1826-SM-4OOSD	Normal-Tissue(GTEx)		0.815589	GTEX-Y3I4-1626-SM-4TT7W	Normal-Tissue(GTEx)		1.02146	TCGA-24-1850-01	Tumor
														2.94488	TCGA-M9-A5M8-01	Tumor		0.310339	GTEX-Q734-1026-SM-48U16	Normal-Tissue(GTEx)		0.411425	GTEX-ZP4G-0626-SM-4WWF1	Normal-Tissue(GTEx)
														1.257	TCGA-IG-A3YC-01	Tumor		4.28319	TCGA-R5-A7ZE-01	Tumor		1.38408	TCGA-61-2102-01	Tumor
														0.163501	GTEX-13X6H-1526-SM-5Q5E2	Normal-Tissue(GTEx)		0.641556	GTEX-144GN-1226-SM-5O991	Normal-Tissue(GTEx)		0.38957	TCGA-25-1321-01	Tumor
														-1.57153e-08	GTEX-14E7W-1926-SM-5S2R9	Normal-Tissue(GTEx)		0.163501	GTEX-11VI4-0326-SM-5EQ6L	Normal-Tissue(GTEx)		3.30009	TCGA-24-2297-01	Tumor
														-1.57153e-08	GTEX-14B4R-0426-SM-5Q5EI	Normal-Tissue(GTEx)		-1.57153e-08	GTEX-UJMC-1226-SM-4IHLI	Normal-Tissue(GTEx)		0.678058	GTEX-YJ8O-1026-SM-5CVM5	Normal-Tissue(GTEx)
														0.124327	GTEX-V955-1126-SM-4JBH3	Normal-Tissue(GTEx)		0.0976133	GTEX-PLZ6-0826-SM-3P61K	Normal-Tissue(GTEx)		4.21261	TCGA-13-0797-01	Tumor
														-1.57153e-08	GTEX-OIZI-1326-SM-3NB1B	Normal-Tissue(GTEx)		-1.57153e-08	GTEX-TKQ2-0926-SM-4DXU5	Normal-Tissue(GTEx)		1.10434	TCGA-57-1586-01	Tumor
														-1.57153e-08	GTEX-11P7K-1226-SM-5HL4X	Normal-Tissue(GTEx)		0.505893	GTEX-WYVS-1326-SM-4ONCQ	Normal-Tissue(GTEx)		0.669016	TCGA-13-1483-01	Tumor
														-1.57153e-08	GTEX-11P81-1026-SM-5GU54	Normal-Tissue(GTEx)		2.60883	TCGA-HU-A4GF-01	Tumor		0.310339	GTEX-13O3O-2726-SM-5KM35	Normal-Tissue(GTEx)
														-1.57153e-08	GTEX-13FTW-1626-SM-5KM4N	Normal-Tissue(GTEx)		0.275004	GTEX-RU1J-0526-SM-46MUT	Normal-Tissue(GTEx)		-1.57153e-08	TCGA-61-1725-01	Tumor
														0.176318	TCGA-L5-A4OQ-11	Normal		2.95977	TCGA-BR-4257-01	Tumor		0.713697	TCGA-29-1707-02	Tumor
														-1.57153e-08	GTEX-OXRK-1326-SM-3NB1A	Normal-Tissue(GTEx)		0.250954	GTEX-QDVN-1226-SM-48TZ5	Normal-Tissue(GTEx)		4.59635	TCGA-24-1417-01	Tumor
														0.163501	GTEX-TKQ1-0326-SM-4DXSM	Normal-Tissue(GTEx)		1.25095	TCGA-HU-A4GU-01	Tumor		2.76127	TCGA-25-1326-01	Tumor
														-1.57153e-08	GTEX-Q734-0826-SM-48U1G	Normal-Tissue(GTEx)		3.68708	TCGA-BR-4366-01	Tumor		6.68161	TCGA-10-0931-01	Tumor
														3.18907	TCGA-JY-A938-01	Tumor		0.26304	GTEX-11NSD-1426-SM-5HL67	Normal-Tissue(GTEx)		4.46078	TCGA-09-1670-01	Tumor
														0.226513	GTEX-132Q8-1826-SM-5EGIY	Normal-Tissue(GTEx)		0.26304	GTEX-S341-0626-SM-4AD5T	Normal-Tissue(GTEx)		3.29128	TCGA-29-1688-01	Tumor
														-1.57153e-08	GTEX-146FR-0526-SM-5Q5EX	Normal-Tissue(GTEx)		3.87186	TCGA-VQ-A91E-01	Tumor		2.77398	TCGA-61-2101-01	Tumor
														2.21104	TCGA-LN-A9FO-01	Tumor		4.89478	TCGA-BR-8077-01	Tumor		0.124327	TCGA-25-1319-01	Tumor
														-1.57153e-08	GTEX-12KS4-0926-SM-5BC5S	Normal-Tissue(GTEx)		3.39098	TCGA-BR-6452-01	Tumor		4.42024	TCGA-20-1683-01	Tumor
														-1.57153e-08	GTEX-WEY5-1026-SM-4LMK9	Normal-Tissue(GTEx)		4.53849	TCGA-R5-A7ZF-01	Tumor		4.45677	TCGA-09-2044-01	Tumor
														0.111034	GTEX-ZP4G-0926-SM-4WWF4	Normal-Tissue(GTEx)		3.23573	TCGA-CD-8524-01	Tumor		2.15054	TCGA-09-1667-01	Tumor
														0.163501	TCGA-JY-A6FB-01	Tumor		1.8914	TCGA-BR-A4J5-01	Tumor		2.57287	TCGA-59-2352-01	Tumor
														0.124327	GTEX-ZT9X-0526-SM-5GCOP	Normal-Tissue(GTEx)		4.06781	TCGA-BR-6802-01	Tumor		0.903017	GTEX-WXYG-1426-SM-4ONCK	Normal-Tissue(GTEx)
														-1.57153e-08	GTEX-12WSD-1826-SM-5GCOA	Normal-Tissue(GTEx)		1.11105	GTEX-ZDYS-1926-SM-5HL59	Normal-Tissue(GTEx)		0.150557	GTEX-11GSP-0226-SM-5A5KV	Normal-Tissue(GTEx)
														0.124327	GTEX-117YW-1926-SM-5H121	Normal-Tissue(GTEx)		0.678058	GTEX-Y3IK-1426-SM-4YCES	Normal-Tissue(GTEx)		0.250954	GTEX-12WSG-1426-SM-5FQUK	Normal-Tissue(GTEx)
														-1.57153e-08	GTEX-RNOR-1226-SM-48FDQ	Normal-Tissue(GTEx)		2.70925	TCGA-HF-7133-01	Tumor		3.16674	TCGA-61-2008-01	Tumor
														0.0703873	GTEX-WFON-1026-SM-4LVMD	Normal-Tissue(GTEx)		0.356135	TCGA-BR-7723-01	Tumor		5.45943	TCGA-61-2008-02	Tumor
														-1.57153e-08	GTEX-SNMC-0426-SM-4DM5Y	Normal-Tissue(GTEx)		1.8914	TCGA-CG-5720-01	Tumor		0.21412	GTEX-X4EO-2426-SM-4QASD	Normal-Tissue(GTEx)
														-1.57153e-08	GTEX-R55G-1026-SM-48FDI	Normal-Tissue(GTEx)		0.111034	GTEX-UPK5-2126-SM-4JBJK	Normal-Tissue(GTEx)		0.150557	GTEX-12WSK-1926-SM-5LZVK	Normal-Tissue(GTEx)
														-1.57153e-08	GTEX-NPJ8-2026-SM-3TW91	Normal-Tissue(GTEx)		0.111034	GTEX-R53T-1226-SM-48FCT	Normal-Tissue(GTEx)		2.90112	TCGA-09-2056-01	Tumor
														0.163501	GTEX-ZEX8-1426-SM-4WKHQ	Normal-Tissue(GTEx)		0.367373	GTEX-ZF29-1526-SM-4WKF7	Normal-Tissue(GTEx)		5.61736	TCGA-13-1403-01	Tumor
														0.111034	GTEX-WYBS-1626-SM-4ONCA	Normal-Tissue(GTEx)		1.94859	TCGA-D7-8576-01	Tumor		-1.57153e-08	GTEX-13OVI-0726-SM-5L3DD	Normal-Tissue(GTEx)
														-1.57153e-08	GTEX-14H4A-1626-SM-5SI69	Normal-Tissue(GTEx)		0.999979	TCGA-FP-8099-01	Tumor		-1.57153e-08	GTEX-RU1J-0826-SM-46MUU	Normal-Tissue(GTEx)
														4.60584	TCGA-2H-A9GL-01	Tumor		4.24186	TCGA-CD-5801-01	Tumor		5.46041	TCGA-13-0923-01	Tumor
														-1.57153e-08	GTEX-131XE-1426-SM-5HL7V	Normal-Tissue(GTEx)		5.31546	TCGA-BR-8289-01	Tumor		5.64676	TCGA-13-1407-01	Tumor
														-1.57153e-08	GTEX-1339X-1126-SM-5J2OI	Normal-Tissue(GTEx)		4.14817	TCGA-CG-5724-01	Tumor		5.63578	TCGA-10-0936-01	Tumor
														-1.57153e-08	GTEX-ZTSS-0826-SM-5985L	Normal-Tissue(GTEx)		2.29275	TCGA-F1-A448-01	Tumor		5.02942	TCGA-24-0982-01	Tumor
														-1.57153e-08	GTEX-PWN1-0626-SM-48TDT	Normal-Tissue(GTEx)		4.68485	TCGA-IN-A6RL-01	Tumor		0.422222	GTEX-TML8-0926-SM-4DXSJ	Normal-Tissue(GTEx)
														0.111034	TCGA-LN-A9FR-01	Tumor		2.24187	TCGA-3M-AB47-01	Tumor		5.42524	TCGA-23-1109-01	Tumor
														0.0976133	GTEX-11NUK-1326-SM-5P9GN	Normal-Tissue(GTEx)		0.411425	GTEX-13OW6-2526-SM-5IJEC	Normal-Tissue(GTEx)		0.659921	GTEX-ZYFG-1726-SM-5GZZB	Normal-Tissue(GTEx)
														5.97637	TCGA-ZR-A9CJ-01	Tumor		1.94859	TCGA-D7-6522-01	Tumor		4.86744	TCGA-31-1951-01	Tumor
														-1.57153e-08	GTEX-ZYW4-1626-SM-5GIE6	Normal-Tissue(GTEx)		4.53916	TCGA-FP-7829-01	Tumor		3.54224	TCGA-10-0933-01	Tumor
														0.275004	TCGA-VR-AA7I-01	Tumor		0.333419	GTEX-Y8LW-0826-SM-4WWDO	Normal-Tissue(GTEx)		0.0976133	TCGA-24-1427-01	Tumor
														0.201631	TCGA-LN-A7HZ-01	Tumor		3.40601	TCGA-BR-8297-01	Tumor		3.09251	TCGA-59-2350-01	Tumor
														-1.57153e-08	GTEX-ZT9W-1426-SM-4YCD2	Normal-Tissue(GTEx)		0.584968	TCGA-CG-5732-01	Tumor		3.43566	TCGA-13-0900-01	Tumor
														-1.57153e-08	GTEX-11DYG-1326-SM-5N9DO	Normal-Tissue(GTEx)		-1.57153e-08	GTEX-1339X-1426-SM-5K7YO	Normal-Tissue(GTEx)		0.150557	GTEX-WYVS-1526-SM-4OND4	Normal-Tissue(GTEx)
														0.545956	GTEX-TSE9-1226-SM-4DXTM	Normal-Tissue(GTEx)		1.41683	GTEX-PW2O-1226-SM-48TCH	Normal-Tissue(GTEx)		-1.57153e-08	GTEX-1269C-1826-SM-5N9E1	Normal-Tissue(GTEx)
														-1.57153e-08	GTEX-13113-0626-SM-5GCP2	Normal-Tissue(GTEx)		0.713697	TCGA-BR-8486-01	Tumor		6.11396	TCGA-61-2088-01	Tumor
														-1.57153e-08	GTEX-QLQW-0526-SM-4R1KS	Normal-Tissue(GTEx)		1.31616	TCGA-VQ-A8DU-01	Tumor		2.29864	TCGA-23-1022-01	Tumor
														-1.57153e-08	GTEX-TML8-1526-SM-4DXUX	Normal-Tissue(GTEx)		0.411425	TCGA-BR-6457-11	Normal		1.64152	TCGA-25-1313-01	Tumor
														-1.57153e-08	GTEX-QMRM-0926-SM-447BR	Normal-Tissue(GTEx)		3.74205	TCGA-HJ-7597-01	Tumor		3.40329	TCGA-VG-A8LO-01	Tumor
														-1.57153e-08	GTEX-R55D-1226-SM-48FE9	Normal-Tissue(GTEx)		0.137501	GTEX-146FH-2126-SM-5SI9U	Normal-Tissue(GTEx)		1.91456	TCGA-OY-A56Q-01	Tumor
														-1.57153e-08	GTEX-WZTO-1726-SM-4PQYV	Normal-Tissue(GTEx)		0.0976133	GTEX-146FR-2026-SM-5NQAI	Normal-Tissue(GTEx)		6.84063	TCGA-13-1510-01	Tumor
														-1.57153e-08	GTEX-12C56-1226-SM-5FQSU	Normal-Tissue(GTEx)		0.739854	GTEX-T5JW-0926-SM-4DM5K	Normal-Tissue(GTEx)		3.19691	TCGA-25-1317-01	Tumor
														-1.57153e-08	GTEX-U8XE-1826-SM-4E3HV	Normal-Tissue(GTEx)		0.176318	GTEX-13FTW-1726-SM-5KM2B	Normal-Tissue(GTEx)		0.432948	GTEX-X15G-1726-SM-4PQZN	Normal-Tissue(GTEx)
														0.0976133	GTEX-ZTPG-1526-SM-51MTF	Normal-Tissue(GTEx)		0.83188	TCGA-EQ-8122-01	Tumor		0.176318	GTEX-146FH-2526-SM-5Q5BP	Normal-Tissue(GTEx)
														-1.57153e-08	GTEX-13OW8-2326-SM-5L3I9	Normal-Tissue(GTEx)		0.641556	TCGA-IN-AB1V-01	Tumor		4.49373	TCGA-13-1488-01	Tumor
														-1.57153e-08	GTEX-11EM3-0926-SM-5A5KK	Normal-Tissue(GTEx)		2.83999	TCGA-FP-A9TM-01	Tumor		5.75141	TCGA-61-2104-01	Tumor
														-1.57153e-08	GTEX-13NYB-0926-SM-5IFFA	Normal-Tissue(GTEx)		3.45282	TCGA-CG-4437-01	Tumor		0.731174	TCGA-13-1509-01	Tumor
														-1.57153e-08	GTEX-145MF-1526-SM-5LU95	Normal-Tissue(GTEx)		1.18271	TCGA-VQ-A8PQ-01	Tumor		0.782421	TCGA-13-0897-01	Tumor
														0.344836	TCGA-IG-A625-01	Tumor		1.43827	TCGA-RD-A8MV-01	Tumor		-1.57153e-08	GTEX-POMQ-1426-SM-3P61D	Normal-Tissue(GTEx)
														-1.57153e-08	GTEX-XYKS-1126-SM-4BRWP	Normal-Tissue(GTEx)		-1.57153e-08	GTEX-UJHI-1026-SM-4IHJP	Normal-Tissue(GTEx)		0.137501	TCGA-24-1434-01	Tumor
														0.042644	TCGA-IG-A3QL-01	Tumor		0.333419	TCGA-VQ-A8PF-01	Tumor		3.86693	TCGA-13-0908-01	Tumor
														-1.57153e-08	GTEX-U8XE-1726-SM-4E3IF	Normal-Tissue(GTEx)		0.189038	GTEX-T5JC-1926-SM-4DM6Q	Normal-Tissue(GTEx)		0.545956	TCGA-29-1776-01	Tumor
														-1.57153e-08	GTEX-12696-1526-SM-5EGL6	Normal-Tissue(GTEx)		0.111034	TCGA-VQ-A91Y-01	Tumor		-1.57153e-08	GTEX-U3ZN-1026-SM-4DXTC	Normal-Tissue(GTEx)
														-1.57153e-08	GTEX-11GSP-1826-SM-5N9DQ	Normal-Tissue(GTEx)		1.65993	TCGA-ZA-A8F6-01	Tumor		0.163501	TCGA-29-1711-01	Tumor
														-1.57153e-08	GTEX-13FTW-1526-SM-5LZXC	Normal-Tissue(GTEx)		2.92792	TCGA-BR-7851-01	Tumor		-1.57153e-08	TCGA-13-1487-01	Tumor
														-1.57153e-08	GTEX-QESD-0826-SM-47J4G	Normal-Tissue(GTEx)		0.505893	GTEX-ZXES-1426-SM-5NQ8S	Normal-Tissue(GTEx)		0.226513	GTEX-P4PP-2426-SM-3P61L	Normal-Tissue(GTEx)
														0.704867	TCGA-S8-A6BV-01	Tumor		0.21412	TCGA-BR-4187-01	Tumor		0.333419	TCGA-04-1347-01	Tumor
														-1.57153e-08	GTEX-131YS-1426-SM-5IJF7	Normal-Tissue(GTEx)		6.31344	TCGA-R5-A7O7-01	Tumor		5.24034	TCGA-29-1703-01	Tumor
														-1.57153e-08	GTEX-R55C-0726-SM-48FCN	Normal-Tissue(GTEx)		2.61351	TCGA-R5-A7ZR-01	Tumor		6.20734	TCGA-04-1542-01	Tumor
														0.321936	TCGA-IG-A4P3-01	Tumor		0.189038	GTEX-131XF-1226-SM-5HL8V	Normal-Tissue(GTEx)		0.298665	GTEX-ZZPU-2126-SM-5EGIU	Normal-Tissue(GTEx)
														4.79334	TCGA-2H-A9GR-01	Tumor		-1.57153e-08	GTEX-ZE7O-3026-SM-51MS4	Normal-Tissue(GTEx)		1.37293	TCGA-23-1116-01	Tumor
														0.464679	GTEX-P4PP-0626-SM-3NM9X	Normal-Tissue(GTEx)		2.83999	TCGA-HU-A4GP-01	Tumor		0.084067	TCGA-09-1662-01	Tumor
														0.0703873	TCGA-LN-A5U7-01	Tumor		-1.57153e-08	GTEX-131XE-2226-SM-5PNYX	Normal-Tissue(GTEx)		2.50077	TCGA-29-1694-01	Tumor
														0.0976133	TCGA-LN-A5U6-01	Tumor		0.189038	TCGA-BR-8676-01	Tumor		1.7049	TCGA-04-1365-01	Tumor
														0.150557	GTEX-RN64-1026-SM-48FDX	Normal-Tissue(GTEx)		2.49312	TCGA-D7-6527-01	Tumor		1.25095	TCGA-04-1356-01	Tumor
														0.124327	GTEX-13QBU-0826-SM-5IJBU	Normal-Tissue(GTEx)		4.32981	TCGA-HU-A4H3-01	Tumor		6.13377	TCGA-04-1361-01	Tumor
														-1.57153e-08	GTEX-YEC4-1226-SM-5CVLX	Normal-Tissue(GTEx)		1.69596	TCGA-CG-4477-01	Tumor		5.73041	TCGA-13-1497-01	Tumor
														0.0703873	TCGA-LN-A7HW-01	Tumor		-1.57153e-08	GTEX-R55G-1126-SM-48FDG	Normal-Tissue(GTEx)		1.24487	TCGA-04-1332-01	Tumor
														-1.57153e-08	GTEX-131XE-1526-SM-5KM1A	Normal-Tissue(GTEx)		0.137501	GTEX-13OVI-2426-SM-5KM4J	Normal-Tissue(GTEx)		0.189038	TCGA-25-1877-01	Tumor
														0.0976133	GTEX-13X6H-1326-SM-5LU42	Normal-Tissue(GTEx)		4.73063	TCGA-BR-4368-01	Tumor		3.89722	TCGA-24-1471-01	Tumor
														0.0565848	TCGA-L5-A88Z-01	Tumor		1.42762	TCGA-CG-4443-01	Tumor		2.01078	TCGA-23-1030-01	Tumor
														0.163501	GTEX-WFJO-0826-SM-4LVM5	Normal-Tissue(GTEx)		5.18945	TCGA-ZQ-A9CR-01	Tumor		0.137501	TCGA-13-0888-01	Tumor
														0.163501	GTEX-XV7Q-1126-SM-4BRVS	Normal-Tissue(GTEx)		5.12724	TCGA-KB-A93H-01	Tumor		3.47893	TCGA-24-2298-01	Tumor
														-1.57153e-08	GTEX-TKQ1-0426-SM-4DXT4	Normal-Tissue(GTEx)		0.464679	GTEX-11I78-1726-SM-5A5M3	Normal-Tissue(GTEx)		4.82371	TCGA-25-1631-01	Tumor
														0.111034	GTEX-ZG7Y-1126-SM-4WWEZ	Normal-Tissue(GTEx)		0.933562	GTEX-S7SF-0626-SM-4AD4V	Normal-Tissue(GTEx)		6.30455	TCGA-24-1416-01	Tumor
														1.77817	TCGA-JY-A6FD-01	Tumor		3.38953	TCGA-D7-8572-01	Tumor		2.0566	TCGA-13-0883-01	Tumor
														2.75275	TCGA-L5-A4OI-01	Tumor		0.238793	TCGA-CG-5722-01	Tumor		0.250954	GTEX-RU72-2226-SM-46MUE	Normal-Tissue(GTEx)
														-1.57153e-08	GTEX-148VJ-1126-SM-5NQBZ	Normal-Tissue(GTEx)		1.49568	TCGA-BR-6564-01	Tumor		4.49823	TCGA-29-1710-01	Tumor
														2.68261	TCGA-L5-A4ON-01	Tumor		3.58133	TCGA-BR-8380-01	Tumor		4.88512	TCGA-24-2267-01	Tumor
														-1.57153e-08	GTEX-14AS3-0626-SM-5QGQD	Normal-Tissue(GTEx)		0.495692	GTEX-WFG8-1326-SM-4LVN3	Normal-Tissue(GTEx)		-1.57153e-08	GTEX-13VXT-1526-SM-5LU3J	Normal-Tissue(GTEx)
														-1.57153e-08	GTEX-13OVJ-1326-SM-5K7Z9	Normal-Tissue(GTEx)		-1.57153e-08	TCGA-BR-8682-01	Tumor		4.65593	TCGA-13-0913-02	Tumor
														-1.57153e-08	GTEX-S95S-0426-SM-4B64I	Normal-Tissue(GTEx)		3.03563	TCGA-B7-A5TN-01	Tumor		0.903017	TCGA-61-1919-01	Tumor
														-1.57153e-08	GTEX-1211K-1026-SM-5EQ4B	Normal-Tissue(GTEx)		0.201631	GTEX-12WSD-2326-SM-59HKQ	Normal-Tissue(GTEx)		5.66646	TCGA-29-1778-01	Tumor
														0.150557	GTEX-R3RS-1326-SM-48FE7	Normal-Tissue(GTEx)		3.91552	TCGA-CG-4442-01	Tumor		6.28007	TCGA-13-0901-01	Tumor
														-1.57153e-08	GTEX-14E6E-0726-SM-5S2R3	Normal-Tissue(GTEx)		5.65244	TCGA-CD-8533-01	Tumor		3.19691	TCGA-31-1946-01	Tumor
														-1.57153e-08	GTEX-WY7C-1326-SM-4ONCX	Normal-Tissue(GTEx)		-1.57153e-08	TCGA-VQ-AA69-01	Tumor		3.98736	TCGA-13-0891-01	Tumor
														-1.57153e-08	GTEX-XXEK-0426-SM-4BRVW	Normal-Tissue(GTEx)		0.26304	GTEX-ZAB4-1526-SM-5CVN7	Normal-Tissue(GTEx)		-1.57153e-08	GTEX-139D8-2426-SM-5KM3A	Normal-Tissue(GTEx)
														0.137501	GTEX-RWSA-1326-SM-47JX9	Normal-Tissue(GTEx)		2.01078	TCGA-CG-5719-01	Tumor		4.34978	TCGA-24-2281-01	Tumor
														1.48543	TCGA-JY-A93D-01	Tumor		2.79074	TCGA-CD-5803-01	Tumor		0.356135	TCGA-25-2398-01	Tumor
														-1.57153e-08	GTEX-ZF29-1226-SM-4WKH1	Normal-Tissue(GTEx)		1.53608	TCGA-VQ-A91U-01	Tumor		4.15383	TCGA-23-1024-01	Tumor
														0.0565848	TCGA-LN-A7HX-01	Tumor		3.67241	TCGA-IN-A6RS-01	Tumor		5.1526	TCGA-13-1489-02	Tumor
														0.124327	GTEX-1212Z-2126-SM-5FQTM	Normal-Tissue(GTEx)		0.782421	GTEX-111CU-0926-SM-5EGIK	Normal-Tissue(GTEx)		6.24523	TCGA-13-1489-01	Tumor
														0.0976133	GTEX-11ONC-1426-SM-5N9F4	Normal-Tissue(GTEx)		2.82778	TCGA-BR-6458-01	Tumor		2.61117	TCGA-30-1860-01	Tumor
														-1.57153e-08	GTEX-WFG7-1026-SM-4LMK8	Normal-Tissue(GTEx)		0.76554	GTEX-WY7C-1726-SM-4ONCC	Normal-Tissue(GTEx)		2.36735	TCGA-13-0714-01	Tumor
														-1.57153e-08	GTEX-QLQ7-0926-SM-447BC	Normal-Tissue(GTEx)		0.918387	TCGA-CG-5728-11	Normal		5.1081	TCGA-24-1422-01	Tumor
														-1.57153e-08	GTEX-139T6-0726-SM-5PNVK	Normal-Tissue(GTEx)		2.11102	TCGA-VQ-A8PK-01	Tumor		3.19379	TCGA-61-1995-01	Tumor
														3.85901	TCGA-L5-A4OT-01	Tumor		4.57651	TCGA-D7-A4YU-01	Tumor		2.9616	TCGA-04-1357-01	Tumor
														0.124327	GTEX-S32W-0926-SM-4AD5X	Normal-Tissue(GTEx)		1.59457	TCGA-BR-8060-01	Tumor		0.0976133	GTEX-P4QT-2426-SM-3NMCL	Normal-Tissue(GTEx)
														-1.57153e-08	GTEX-113JC-0926-SM-5H114	Normal-Tissue(GTEx)		2.38131	TCGA-RD-A8N5-01	Tumor		0.111034	TCGA-5X-AA5U-01	Tumor
														-1.57153e-08	GTEX-13OVJ-1226-SM-5L3HA	Normal-Tissue(GTEx)		5.11772	TCGA-CG-4469-01	Tumor		6.00492	TCGA-24-2036-01	Tumor
														-1.57153e-08	GTEX-T5JW-1326-SM-4DM5G	Normal-Tissue(GTEx)		0.555816	TCGA-FP-7735-01	Tumor		2.69156	TCGA-61-2002-01	Tumor
														0.084067	GTEX-Y3I4-1226-SM-4TT8N	Normal-Tissue(GTEx)		2.13097	TCGA-VQ-AA6G-01	Tumor		0.38957	GTEX-OHPL-2426-SM-48TDN	Normal-Tissue(GTEx)
														0.21412	TCGA-JY-A6FH-01	Tumor		1.66451	TCGA-VQ-A91Z-01	Tumor		0.201631	TCGA-29-1701-01	Tumor
														-1.57153e-08	GTEX-T8EM-0526-SM-4DM64	Normal-Tissue(GTEx)		1.23264	TCGA-D7-5578-01	Tumor		0.641556	TCGA-23-1118-01	Tumor
														-1.57153e-08	GTEX-131XF-1126-SM-5HL8J	Normal-Tissue(GTEx)		2.41145	TCGA-CG-5733-11	Normal		5.44693	TCGA-24-1467-01	Tumor
														2.12434	TCGA-L5-A4OS-01	Tumor		0.298665	TCGA-HU-A4GH-01	Tumor		1.87579	TCGA-09-1673-01	Tumor
														0.137501	GTEX-133LE-0626-SM-5IFFJ	Normal-Tissue(GTEx)		6.4744	TCGA-CD-8528-01	Tumor		0.150557	GTEX-Q734-0726-SM-48TZP	Normal-Tissue(GTEx)
														0.111034	GTEX-111CU-0726-SM-5GZYD	Normal-Tissue(GTEx)		0.084067	TCGA-BR-8589-01	Tumor		1.2265	TCGA-24-1428-01	Tumor
														-1.57153e-08	GTEX-PSDG-1426-SM-48TD1	Normal-Tissue(GTEx)		0.926	GTEX-ZP4G-1226-SM-4WWCJ	Normal-Tissue(GTEx)		1.04263	TCGA-23-1120-01	Tumor
														-1.57153e-08	GTEX-13NYB-1326-SM-5K7Y1	Normal-Tissue(GTEx)		1.24487	TCGA-VQ-AA6D-01	Tumor		4.17149	TCGA-61-2109-01	Tumor
														-1.57153e-08	TCGA-S8-A6BW-01	Tumor		1.07038	GTEX-S4UY-1626-SM-4AD55	Normal-Tissue(GTEx)		0.238793	TCGA-04-1338-01	Tumor
														0.226513	GTEX-QDVJ-0826-SM-48U1S	Normal-Tissue(GTEx)		5.36637	TCGA-HU-8604-01	Tumor		0.238793	TCGA-61-1914-01	Tumor
														3.53977	TCGA-V5-AASW-01	Tumor		2.74202	TCGA-FP-8631-01	Tumor		0.59455	GTEX-12WSJ-1226-SM-5LU91	Normal-Tissue(GTEx)
														-1.57153e-08	GTEX-13U4I-1226-SM-5LU5M	Normal-Tissue(GTEx)		0.823748	GTEX-QDVJ-1426-SM-48U1Y	Normal-Tissue(GTEx)		1.32769	TCGA-23-1110-01	Tumor
														-1.57153e-08	GTEX-11LCK-1726-SM-5S2OQ	Normal-Tissue(GTEx)		5.09005	TCGA-BR-8361-01	Tumor		3.36594	TCGA-31-1944-01	Tumor
														0.176318	GTEX-QEG5-1326-SM-4R1JS	Normal-Tissue(GTEx)		4.61764	TCGA-BR-8680-01	Tumor		3.86199	TCGA-59-2351-01	Tumor
														-1.57153e-08	GTEX-Y9LG-0626-SM-4WWDH	Normal-Tissue(GTEx)		0.62293	GTEX-WXYG-1626-SM-4ONCR	Normal-Tissue(GTEx)		3.48539	TCGA-29-1769-01	Tumor
														-1.57153e-08	GTEX-13PL7-0326-SM-5IJEK	Normal-Tissue(GTEx)		0.526084	GTEX-QMRM-1126-SM-447BN	Normal-Tissue(GTEx)		0.189038	TCGA-09-2051-01	Tumor
														4.66506	TCGA-R6-A6L4-01	Tumor		-1.57153e-08	TCGA-IN-7806-11	Normal		2.88753	TCGA-61-1910-01	Tumor
														-1.57153e-08	GTEX-XXEK-0326-SM-4BRVV	Normal-Tissue(GTEx)		0.321936	GTEX-O5YW-1526-SM-3MJGL	Normal-Tissue(GTEx)		5.67244	TCGA-04-1343-01	Tumor
														0.0976133	GTEX-ZE9C-1126-SM-4WWBD	Normal-Tissue(GTEx)		0.176318	GTEX-YEC4-1426-SM-5IFHS	Normal-Tissue(GTEx)		2.33911	TCGA-25-1626-01	Tumor
														2.74202	TCGA-LN-A5U5-01	Tumor		3.00896	TCGA-VQ-A8DZ-01	Tumor		2.01794	TCGA-13-1492-01	Tumor
														0.367373	GTEX-11I78-1426-SM-5PNVY	Normal-Tissue(GTEx)		4.9621	TCGA-RD-A7BT-01	Tumor		0.999979	TCGA-24-1544-01	Tumor
														0.111034	GTEX-1122O-1726-SM-5GICM	Normal-Tissue(GTEx)		3.97911	TCGA-VQ-A92D-01	Tumor		3.53977	TCGA-23-2077-01	Tumor
														0.773987	TCGA-R6-A8WG-01	Tumor		0.150557	GTEX-VJYA-1026-SM-4KL21	Normal-Tissue(GTEx)		3.89237	TCGA-36-1568-01	Tumor
														0.042644	TCGA-LN-A49S-01	Tumor		0.111034	TCGA-D7-8573-01	Tumor		0.201631	TCGA-13-1511-01	Tumor
														-1.57153e-08	GTEX-ZA64-0526-SM-5HL9I	Normal-Tissue(GTEx)		-1.57153e-08	GTEX-ZVZP-1726-SM-5GZWY	Normal-Tissue(GTEx)		4.86193	TCGA-24-2035-01	Tumor
														-1.57153e-08	GTEX-WHWD-1026-SM-4OORZ	Normal-Tissue(GTEx)		-1.57153e-08	GTEX-Y114-1226-SM-4TT88	Normal-Tissue(GTEx)		5.15338	TCGA-57-1585-01	Tumor
														-1.57153e-08	GTEX-O5YT-0726-SM-3MJHA	Normal-Tissue(GTEx)		-1.57153e-08	GTEX-SNOS-0826-SM-4DM5N	Normal-Tissue(GTEx)		2.9616	TCGA-61-2113-01	Tumor
														-1.57153e-08	GTEX-P4PP-0726-SM-3NM9S	Normal-Tissue(GTEx)		1.0072	TCGA-D7-6815-01	Tumor		2.92219	TCGA-61-2000-01	Tumor
														-1.57153e-08	GTEX-146FH-1726-SM-5QGQ2	Normal-Tissue(GTEx)		1.46991	TCGA-VQ-A8P5-01	Tumor		4.73063	TCGA-13-0762-01	Tumor
														0.238793	GTEX-WRHK-0526-SM-4MVOF	Normal-Tissue(GTEx)		2.83595	TCGA-KB-A6F7-01	Tumor		0.124327	TCGA-31-1956-01	Tumor
														-1.57153e-08	TCGA-IG-A3YB-01	Tumor		2.78449	TCGA-BR-A44U-01	Tumor		4.36595	TCGA-25-2399-01	Tumor
														1.51603	TCGA-V5-AASX-01	Tumor		1.52607	TCGA-CD-5813-01	Tumor		4.6713	TCGA-13-0911-01	Tumor
														0.137501	GTEX-X15G-0926-SM-4PQZE	Normal-Tissue(GTEx)		1.55582	TCGA-HU-8610-01	Tumor		0.948623	GTEX-131YS-2226-SM-5P9G8	Normal-Tissue(GTEx)
														3.84198	TCGA-L5-A8NG-01	Tumor		-1.57153e-08	GTEX-TKQ1-0526-SM-4DXTG	Normal-Tissue(GTEx)		4.01614	TCGA-59-2348-01	Tumor
														0.124327	GTEX-ZC5H-1326-SM-5HL7E	Normal-Tissue(GTEx)		-1.57153e-08	TCGA-D7-A4YX-01	Tumor		1.89915	TCGA-13-0893-01	Tumor
														0.111034	GTEX-13YAN-2026-SM-5Q5EY	Normal-Tissue(GTEx)		0.696007	GTEX-V1D1-1726-SM-4JBHB	Normal-Tissue(GTEx)		6.19649	TCGA-13-0804-01	Tumor
														0.124327	TCGA-LN-A4A4-01	Tumor		-1.57153e-08	TCGA-HU-A4G2-01	Tumor		4.50779	TCGA-61-1741-01	Tumor
														1.70927	TCGA-JY-A6FA-01	Tumor		1.77817	TCGA-MX-A5UG-01	Tumor		0.731174	TCGA-36-1577-01	Tumor
														-1.57153e-08	GTEX-WY7C-0826-SM-4ONCG	Normal-Tissue(GTEx)		1.74846	TCGA-KB-A93G-01	Tumor		3.13914	TCGA-61-2012-01	Tumor
														0.124327	GTEX-S4Q7-0626-SM-4AD5M	Normal-Tissue(GTEx)		3.54224	TCGA-VQ-A94T-01	Tumor		0.124327	TCGA-13-1411-01	Tumor
														0.124327	GTEX-13QBU-0926-SM-5K7WQ	Normal-Tissue(GTEx)		-1.57153e-08	GTEX-11WQK-2626-SM-5EQ4K	Normal-Tissue(GTEx)		3.17154	TCGA-29-1691-01	Tumor
														2.04612	TCGA-L5-A88S-01	Tumor		0.124327	GTEX-ZVP2-1626-SM-5GU5D	Normal-Tissue(GTEx)		0.505893	TCGA-25-2391-01	Tumor
														1.85996	TCGA-2H-A9GN-01	Tumor		0.555816	GTEX-XV7Q-1326-SM-4BRWM	Normal-Tissue(GTEx)		2.16031	TCGA-13-1405-01	Tumor
														0.084067	GTEX-YEC3-1926-SM-4WWF5	Normal-Tissue(GTEx)		0.516027	GTEX-X15G-1126-SM-4PQZG	Normal-Tissue(GTEx)		1.68257	TCGA-29-1777-01	Tumor
														-1.57153e-08	GTEX-W5WG-1526-SM-4LMIG	Normal-Tissue(GTEx)		0.176318	GTEX-1399R-1126-SM-5IFIO	Normal-Tissue(GTEx)		2.83595	TCGA-WR-A838-01	Tumor
														0.298665	GTEX-14DAQ-1426-SM-5RQJD	Normal-Tissue(GTEx)		2.56805	TCGA-BR-4256-01	Tumor		5.17749	TCGA-61-1728-01	Tumor
														-1.57153e-08	GTEX-139TU-1326-SM-5LZXW	Normal-Tissue(GTEx)		2.43832	TCGA-BR-A4PF-01	Tumor		4.55706	TCGA-13-0924-01	Tumor
														0.250954	GTEX-12WSN-1826-SM-5LZUT	Normal-Tissue(GTEx)		-1.57153e-08	TCGA-HU-A4GC-11	Normal		2.8699	TCGA-24-1464-01	Tumor
														-1.57153e-08	GTEX-Q2AG-1326-SM-43V8K	Normal-Tissue(GTEx)		4.204	TCGA-CD-8531-01	Tumor		0.0703873	TCGA-61-1733-01	Tumor
														0.0976133	GTEX-ZPIC-1626-SM-57WEB	Normal-Tissue(GTEx)		3.59453	TCGA-HU-A4G9-01	Tumor		3.79181	TCGA-25-1323-01	Tumor
														-1.57153e-08	GTEX-145LS-1826-SM-5LUAZ	Normal-Tissue(GTEx)		4.23267	TCGA-VQ-A91S-01	Tumor		2.66675	TCGA-24-1424-01	Tumor
														3.13754	TCGA-L5-A43C-01	Tumor		0.275004	GTEX-OXRK-1626-SM-3NB17	Normal-Tissue(GTEx)		5.13258	TCGA-61-1918-01	Tumor
														3.8768	TCGA-L5-A891-01	Tumor		0.903017	GTEX-Q2AI-0826-SM-48TZO	Normal-Tissue(GTEx)		6.00561	TCGA-13-1408-01	Tumor
														-1.57153e-08	GTEX-13X6H-1426-SM-5SI91	Normal-Tissue(GTEx)		0.895309	TCGA-CD-A48A-01	Tumor		-1.57153e-08	GTEX-13U4I-2126-SM-5LU55	Normal-Tissue(GTEx)
														0.111034	GTEX-S3XE-0926-SM-4AD4S	Normal-Tissue(GTEx)		1.541	TCGA-BR-7197-01	Tumor		0.782421	GTEX-11XUK-1626-SM-5GU5O	Normal-Tissue(GTEx)
														-1.57153e-08	GTEX-13SLX-1726-SM-5Q5E5	Normal-Tissue(GTEx)		0.0703873	GTEX-Y5V6-1326-SM-4VDTF	Normal-Tissue(GTEx)		4.99047	TCGA-61-1724-01	Tumor
														3.969	TCGA-L5-A8NV-01	Tumor		2.69824	TCGA-VQ-A922-01	Tumor		0.367373	GTEX-13FTX-0926-SM-5IFF7	Normal-Tissue(GTEx)
														0.111034	GTEX-VUSG-1026-SM-4KKZN	Normal-Tissue(GTEx)		2.19538	TCGA-BR-4267-01	Tumor		3.24334	TCGA-23-1107-01	Tumor
														-1.57153e-08	GTEX-Z9EW-0326-SM-5CVM8	Normal-Tissue(GTEx)		0.238793	GTEX-13PVQ-2126-SM-5L3FW	Normal-Tissue(GTEx)		4.90686	TCGA-29-1696-01	Tumor
														-1.57153e-08	GTEX-14A6H-1326-SM-5NQBC	Normal-Tissue(GTEx)		0.250954	GTEX-SUCS-0926-SM-4DM4Z	Normal-Tissue(GTEx)		1.47509	TCGA-29-2428-01	Tumor
														-1.57153e-08	GTEX-XBEW-1426-SM-4AT4J	Normal-Tissue(GTEx)		2.43562	TCGA-CD-8532-01	Tumor		0.124327	TCGA-29-1690-01	Tumor
														-1.57153e-08	GTEX-11ZTT-0926-SM-5EQMS	Normal-Tissue(GTEx)		1.36735	TCGA-BR-7715-11	Normal		1.79907	TCGA-25-1320-01	Tumor
														-1.57153e-08	GTEX-ZYFC-1626-SM-5N9EU	Normal-Tissue(GTEx)		5.3331	TCGA-BR-7717-01	Tumor		0.669016	TCGA-09-2045-01	Tumor
														-1.57153e-08	GTEX-144GN-0626-SM-5O9B2	Normal-Tissue(GTEx)		0.0976133	TCGA-BR-8686-01	Tumor		0.201631	TCGA-36-1570-01	Tumor
														-1.57153e-08	GTEX-XBED-0926-SM-48TCE	Normal-Tissue(GTEx)		0.495692	TCGA-BR-7958-01	Tumor		1.99637	TCGA-29-2414-02	Tumor
														-1.57153e-08	GTEX-XQ8I-1626-SM-4BOOI	Normal-Tissue(GTEx)		4.10094	TCGA-B7-A5TJ-01	Tumor		5.88382	TCGA-24-0970-01	Tumor
														-1.57153e-08	GTEX-11VI4-0626-SM-5EQLO	Normal-Tissue(GTEx)		2.78449	TCGA-VQ-A8DT-01	Tumor		2.70265	TCGA-29-1697-01	Tumor
														0.0976133	GTEX-Y5V6-1126-SM-4VDTD	Normal-Tissue(GTEx)		3.29128	TCGA-BR-8690-01	Tumor		4.16752	TCGA-25-1318-01	Tumor
														3.61941	TCGA-JY-A93F-01	Tumor		2.55584	TCGA-BR-8485-01	Tumor		0.344836	TCGA-09-2054-01	Tumor
														-1.57153e-08	GTEX-146FH-1926-SM-5Q5B2	Normal-Tissue(GTEx)		5.00897	TCGA-IN-8462-01	Tumor		0.367373	TCGA-09-0364-01	Tumor
														-1.57153e-08	GTEX-T2IS-0926-SM-4DM5B	Normal-Tissue(GTEx)		0.863959	TCGA-HU-A4GY-01	Tumor		3.05831	TCGA-13-1499-01	Tumor
														-1.57153e-08	GTEX-U3ZH-1126-SM-4DXUG	Normal-Tissue(GTEx)		1.09761	TCGA-BR-6456-01	Tumor		4.33266	TCGA-24-1560-01	Tumor
														0.137501	GTEX-Y111-1726-SM-4SOIQ	Normal-Tissue(GTEx)		1.92221	TCGA-FP-8210-01	Tumor		3.72679	TCGA-29-1693-01	Tumor
														-1.57153e-08	GTEX-O5YV-1026-SM-3LK72	Normal-Tissue(GTEx)		3.89629	TCGA-CG-4465-01	Tumor		0.839938	GTEX-13QBU-1526-SM-5LU3W	Normal-Tissue(GTEx)
														1.9891	TCGA-L5-A8NU-01	Tumor		2.88554	TCGA-HU-A4G3-01	Tumor		0.823748	TCGA-13-0905-01	Tumor
														-1.57153e-08	GTEX-T6MO-0526-SM-4DM6R	Normal-Tissue(GTEx)		5.04134	TCGA-MX-A5UJ-01	Tumor		0.124327	GTEX-XMD3-2326-SM-4AT5H	Normal-Tissue(GTEx)
														0.321936	TCGA-L5-A4OR-11	Normal		3.8074	TCGA-HU-A4GT-01	Tumor		7.01439	TCGA-13-1404-01	Tumor
														0.250954	GTEX-QEG5-1426-SM-447AS	Normal-Tissue(GTEx)		0.189038	GTEX-WH7G-1526-SM-4LVMX	Normal-Tissue(GTEx)		2.6848	TCGA-31-1953-01	Tumor
														5.59062	TCGA-LN-A7HY-01	Tumor		0.286878	GTEX-W5WG-1726-SM-4LMI5	Normal-Tissue(GTEx)		2.55335	TCGA-09-1666-01	Tumor
														-1.57153e-08	GTEX-QLQW-0626-SM-447A6	Normal-Tissue(GTEx)		3.11434	TCGA-IN-A7NU-01	Tumor		3.82273	TCGA-13-1506-01	Tumor
														0.333419	GTEX-XGQ4-1626-SM-4AT6J	Normal-Tissue(GTEx)		4.88019	TCGA-VQ-A91K-01	Tumor		2.40326	TCGA-13-0768-01	Tumor
														1.90692	TCGA-VR-A8ET-01	Tumor		1.71372	TCGA-BR-6453-01	Tumor		4.20551	TCGA-24-2020-01	Tumor
														-1.57153e-08	GTEX-SE5C-1326-SM-4BRUH	Normal-Tissue(GTEx)		0.176318	TCGA-BR-4253-01	Tumor		5.31828	TCGA-57-1584-01	Tumor
														0.084067	GTEX-Y8E4-1926-SM-4VBPW	Normal-Tissue(GTEx)		0.669016	TCGA-IN-A6RJ-01	Tumor		2.96718	TCGA-09-2053-01	Tumor
														0.321936	GTEX-11EQ9-0926-SM-5HL6I	Normal-Tissue(GTEx)		4.96161	TCGA-CD-8525-01	Tumor		2.51099	TCGA-25-1634-01	Tumor
														0.150557	TCGA-VR-A8EP-01	Tumor		2.94671	TCGA-CD-8530-01	Tumor		0.584968	TCGA-61-1738-01	Tumor
														0.321936	GTEX-11ZUS-0926-SM-5FQSY	Normal-Tissue(GTEx)		0.76554	TCGA-BR-6457-01	Tumor		3.0409	TCGA-13-0920-01	Tumor
														-1.57153e-08	GTEX-NFK9-1226-SM-3LK79	Normal-Tissue(GTEx)		1.9891	TCGA-HF-7132-01	Tumor		3.797	TCGA-25-2393-01	Tumor
														0.137501	GTEX-T5JW-1426-SM-4DM5Q	Normal-Tissue(GTEx)		1.257	TCGA-BR-8592-01	Tumor		3.65307	TCGA-61-2092-01	Tumor
														0.226513	TCGA-R6-A8W8-01	Tumor		4.13996	TCGA-BR-8295-01	Tumor		0.516027	GTEX-WYBS-2426-SM-4ONDI	Normal-Tissue(GTEx)
														0.298665	TCGA-L5-A8NQ-01	Tumor		0.298665	GTEX-WHWD-1426-SM-4OORU	Normal-Tissue(GTEx)		5.80344	TCGA-09-1669-01	Tumor
														-1.57153e-08	GTEX-12ZZW-1726-SM-5DUVD	Normal-Tissue(GTEx)		4.89768	TCGA-BR-7707-01	Tumor		0.226513	TCGA-61-1721-01	Tumor
														-1.57153e-08	GTEX-ZVT2-1226-SM-5GU5H	Normal-Tissue(GTEx)		2.85403	TCGA-D7-6524-01	Tumor		2.11102	TCGA-59-2354-01	Tumor
														1.62295	TCGA-L5-A8NF-01	Tumor		1.47509	TCGA-BR-A44T-01	Tumor		0.201631	TCGA-24-1563-01	Tumor
														0.111034	GTEX-12C56-0426-SM-5FQU1	Normal-Tissue(GTEx)		3.99636	TCGA-CG-5725-01	Tumor		0.38957	TCGA-04-1341-01	Tumor
														1.77399	TCGA-R6-A6XG-01	Tumor		5.15707	TCGA-HU-A4GX-01	Tumor		6.8211	TCGA-24-1616-01	Tumor
														-1.57153e-08	GTEX-139TU-1226-SM-5J2NL	Normal-Tissue(GTEx)		3.84496	TCGA-BR-A4J7-01	Tumor		0.400527	GTEX-11VI4-1026-SM-5EQM1	Normal-Tissue(GTEx)
														-1.57153e-08	GTEX-R53T-1126-SM-48FD4	Normal-Tissue(GTEx)		0.0565848	TCGA-D7-6520-01	Tumor		-1.57153e-08	TCGA-13-0730-01	Tumor
														-1.57153e-08	GTEX-111YS-0926-SM-5EGGI	Normal-Tissue(GTEx)		0.443614	GTEX-ZZPU-1426-SM-5GZZ6	Normal-Tissue(GTEx)		0.150557	GTEX-ZC5H-2026-SM-5CVN2	Normal-Tissue(GTEx)
														-1.57153e-08	GTEX-POYW-1326-SM-48TCG	Normal-Tissue(GTEx)		0.238793	GTEX-ZF2S-1426-SM-57WET	Normal-Tissue(GTEx)		0.137501	GTEX-RTLS-2326-SM-46MUH	Normal-Tissue(GTEx)
														0.378503	GTEX-13W3W-1726-SM-5LU4A	Normal-Tissue(GTEx)		0.238793	GTEX-11DXX-1326-SM-5GIDZ	Normal-Tissue(GTEx)		4.87236	TCGA-13-1507-01	Tumor
														-1.57153e-08	GTEX-SNMC-0526-SM-4DM69	Normal-Tissue(GTEx)		1.55582	TCGA-BR-8384-01	Tumor		1.26306	TCGA-24-2288-01	Tumor
														-1.57153e-08	GTEX-T5JC-1826-SM-4DM6E	Normal-Tissue(GTEx)		1.13748	GTEX-T8EM-1226-SM-4DM5J	Normal-Tissue(GTEx)		1.76128	TCGA-29-1784-01	Tumor
														0.084067	GTEX-YF7O-0826-SM-4W21F	Normal-Tissue(GTEx)		1.56071	TCGA-BR-8678-01	Tumor		5.93102	TCGA-13-0725-01	Tumor
														0.0565848	TCGA-LN-A49O-01	Tumor		0.863959	TCGA-HU-8244-01	Tumor		1.53608	TCGA-24-2254-01	Tumor
														-1.57153e-08	GTEX-13RTK-0426-SM-5RQHT	Normal-Tissue(GTEx)		3.90208	TCGA-VQ-A8E2-01	Tumor
														0.084067	GTEX-QCQG-0726-SM-48U1Z	Normal-Tissue(GTEx)		1.93357	TCGA-BR-6454-01	Tumor
														-1.57153e-08	GTEX-ZF3C-1626-SM-4WWB4	Normal-Tissue(GTEx)		-1.57153e-08	GTEX-13S7M-1826-SM-5RQK6	Normal-Tissue(GTEx)
														-1.57153e-08	GTEX-12WSK-1126-SM-5LZV8	Normal-Tissue(GTEx)		3.00721	TCGA-BR-8683-01	Tumor
														-1.57153e-08	GTEX-QDT8-1326-SM-48TYY	Normal-Tissue(GTEx)		-1.57153e-08	TCGA-FP-7735-11	Normal
														2.08748	TCGA-IG-A6QS-01	Tumor		1.11767	TCGA-D7-6822-01	Tumor
														-1.57153e-08	GTEX-T6MO-0626-SM-4DM6P	Normal-Tissue(GTEx)		0.604087	TCGA-RD-A8N2-01	Tumor
														0.443614	TCGA-IG-A50L-01	Tumor		3.71699	TCGA-CD-5799-01	Tumor
														0.454178	GTEX-145MN-1026-SM-5NQ9G	Normal-Tissue(GTEx)		0.879716	TCGA-FP-A8CX-01	Tumor
														-1.57153e-08	GTEX-ZT9W-1226-SM-57WE4	Normal-Tissue(GTEx)		1.49568	TCGA-RD-A8N9-01	Tumor
														1.09085	TCGA-LN-A49X-01	Tumor		3.31034	TCGA-VQ-A8PC-01	Tumor
														0.124327	GTEX-X15G-0826-SM-4PQZD	Normal-Tissue(GTEx)		4.71918	TCGA-BR-4201-01	Tumor
														-1.57153e-08	GTEX-13N1W-1926-SM-5IJCH	Normal-Tissue(GTEx)		1.42222	TCGA-BR-6563-01	Tumor
														-1.57153e-08	GTEX-14E6C-0926-SM-5S2V9	Normal-Tissue(GTEx)		0.344836	GTEX-WZTO-2126-SM-4PQYW	Normal-Tissue(GTEx)
														-1.57153e-08	GTEX-13O61-1226-SM-5KM21	Normal-Tissue(GTEx)		0.659921	GTEX-WRHK-0626-SM-4MVOE	Normal-Tissue(GTEx)
														-1.57153e-08	GTEX-PSDG-1326-SM-48TD2	Normal-Tissue(GTEx)		3.10939	TCGA-VQ-A91A-01	Tumor
														0.0565848	TCGA-LN-A49P-01	Tumor		-1.57153e-08	TCGA-BR-A4J4-01	Tumor
														-1.57153e-08	GTEX-131XG-0926-SM-5LZW5	Normal-Tissue(GTEx)		3.11266	TCGA-CG-4436-01	Tumor
														-1.57153e-08	GTEX-145LT-1226-SM-5Q5BZ	Normal-Tissue(GTEx)		4.03473	TCGA-D7-A6EZ-01	Tumor
														-1.57153e-08	GTEX-R53T-1026-SM-48FCO	Normal-Tissue(GTEx)		1.02858	GTEX-POMQ-0826-SM-3P61H	Normal-Tissue(GTEx)
														3.44228	TCGA-VR-A8EQ-01	Tumor		2.89142	TCGA-BR-6803-01	Tumor
														-1.57153e-08	GTEX-Y3IK-1126-SM-51MSV	Normal-Tissue(GTEx)		0.084067	GTEX-117YW-2226-SM-5N9DB	Normal-Tissue(GTEx)
														0.124327	GTEX-ZAB5-0926-SM-5CVMV	Normal-Tissue(GTEx)		0.356135	TCGA-BR-6710-01	Tumor
														0.201631	GTEX-PLZ4-1626-SM-3P618	Normal-Tissue(GTEx)		0.111034	GTEX-ZYFG-1326-SM-5GICJ	Normal-Tissue(GTEx)
														-1.57153e-08	GTEX-1399U-1026-SM-5J1OC	Normal-Tissue(GTEx)		0.565594	GTEX-QLQW-0726-SM-447AA	Normal-Tissue(GTEx)
														0.124327	GTEX-WXYG-1226-SM-4ONCJ	Normal-Tissue(GTEx)		1.75275	TCGA-CG-5734-01	Tumor
														-1.57153e-08	GTEX-ZTSS-0726-SM-51MSN	Normal-Tissue(GTEx)		2.31908	TCGA-BR-8369-01	Tumor
														0.0976133	GTEX-ZYFG-1226-SM-5GIC7	Normal-Tissue(GTEx)		1.87187	TCGA-VQ-A91X-01	Tumor
														-1.57153e-08	GTEX-PVOW-1626-SM-48TC9	Normal-Tissue(GTEx)		3.24638	TCGA-HU-8238-01	Tumor
														-1.57153e-08	GTEX-TKQ2-1226-SM-4DXSV	Normal-Tissue(GTEx)		4.5472	TCGA-BR-6705-01	Tumor
														-1.57153e-08	GTEX-X62O-2226-SM-46MW3	Normal-Tissue(GTEx)		0.201631	GTEX-ZV7C-1626-SM-5NQ7E	Normal-Tissue(GTEx)
														-1.57153e-08	GTEX-111CU-0626-SM-5EGHL	Normal-Tissue(GTEx)		-1.57153e-08	TCGA-B7-5818-01	Tumor
														0.189038	GTEX-S95S-0326-SM-4B66U	Normal-Tissue(GTEx)		4.38956	TCGA-VQ-A924-01	Tumor
														4.7835	TCGA-L7-A6VZ-01	Tumor		1.68705	TCGA-CG-4460-01	Tumor
														0.163501	GTEX-QVUS-0626-SM-447CC	Normal-Tissue(GTEx)		1.10434	TCGA-VQ-A8PD-01	Tumor
														0.526084	GTEX-X585-1226-SM-46MW7	Normal-Tissue(GTEx)		2.12102	TCGA-BR-8590-01	Tumor
														-1.57153e-08	GTEX-14BMV-1426-SM-5S2WA	Normal-Tissue(GTEx)		4.53543	TCGA-BR-8483-01	Tumor
														0.21412	GTEX-13O1R-1326-SM-5IJF5	Normal-Tissue(GTEx)		0.687044	GTEX-13FH7-1026-SM-5IJGF	Normal-Tissue(GTEx)
														0.124327	GTEX-SE5C-1226-SM-4BRWV	Normal-Tissue(GTEx)		1.23881	TCGA-D7-A6F0-01	Tumor
														-1.57153e-08	GTEX-ZYVF-2226-SM-5GIDD	Normal-Tissue(GTEx)		1.58975	TCGA-BR-4357-01	Tumor
														0.0976133	GTEX-N7MS-1126-SM-3LK5E	Normal-Tissue(GTEx)		0.356135	TCGA-KB-A93J-01	Tumor
														-1.57153e-08	GTEX-ZVP2-1426-SM-5NQ7P	Normal-Tissue(GTEx)		0.863959	TCGA-CD-A4MH-01	Tumor
														0.163501	GTEX-ZLFU-1026-SM-5EQMZ	Normal-Tissue(GTEx)		0.298665	GTEX-ZVT2-1626-SM-51MRC	Normal-Tissue(GTEx)
														2.24795	TCGA-JY-A939-01	Tumor		0.856001	TCGA-IP-7968-01	Tumor
														-1.57153e-08	GTEX-144FL-2726-SM-5O98Z	Normal-Tissue(GTEx)		5.19421	TCGA-BR-7959-01	Tumor
														-1.57153e-08	GTEX-14753-1926-SM-5NQAA	Normal-Tissue(GTEx)		3.27352	TCGA-CG-5721-01	Tumor
														-1.57153e-08	GTEX-11GS4-1426-SM-5N9D2	Normal-Tissue(GTEx)		1.81966	TCGA-BR-8371-01	Tumor
														0.696007	GTEX-T2IS-0826-SM-4DM6L	Normal-Tissue(GTEx)		0.163501	GTEX-11TT1-0726-SM-5GU5A	Normal-Tissue(GTEx)
														-1.57153e-08	GTEX-PLZ6-0626-SM-3P61B	Normal-Tissue(GTEx)		0.815589	GTEX-131XG-1226-SM-5EGH9	Normal-Tissue(GTEx)
														-1.57153e-08	GTEX-139T6-0626-SM-5IFF9	Normal-Tissue(GTEx)		5.07549	TCGA-BR-8487-01	Tumor
														3.53849	TCGA-L5-A8NN-01	Tumor		3.88268	TCGA-D7-A6EY-01	Tumor
														-1.57153e-08	GTEX-11DXX-1126-SM-5GZZK	Normal-Tissue(GTEx)		0.454178	TCGA-CG-4476-01	Tumor
														0.163501	GTEX-145MH-1226-SM-5RQJT	Normal-Tissue(GTEx)		0.0976133	TCGA-BR-6455-01	Tumor
														-1.57153e-08	GTEX-TMMY-1226-SM-4DXT6	Normal-Tissue(GTEx)		3.89629	TCGA-CG-4305-01	Tumor
														-1.57153e-08	TCGA-LN-A9FQ-01	Tumor		0.495692	TCGA-D7-A6F2-01	Tumor
														0.163501	GTEX-XMK1-1326-SM-4B65Q	Normal-Tissue(GTEx)		1.18905	TCGA-CD-5798-01	Tumor
														-1.57153e-08	GTEX-1269C-1026-SM-5N9EY	Normal-Tissue(GTEx)		0.604087	TCGA-BR-8366-01	Tumor
														-1.57153e-08	GTEX-WVLH-1426-SM-4MVNX	Normal-Tissue(GTEx)		0.475073	TCGA-CG-4441-01	Tumor
														0.111034	GTEX-XYKS-1526-SM-4BRUP	Normal-Tissue(GTEx)		0.137501	GTEX-R55D-1526-SM-48FEJ	Normal-Tissue(GTEx)
														-1.57153e-08	GTEX-13O21-0626-SM-5IJDI	Normal-Tissue(GTEx)		0.0976133	GTEX-P4QT-1526-SM-3NMCT	Normal-Tissue(GTEx)
														-1.57153e-08	GTEX-W5WG-2726-SM-4LMIC	Normal-Tissue(GTEx)		0.495692	GTEX-Y5LM-1326-SM-5RQIS	Normal-Tissue(GTEx)
														-1.57153e-08	GTEX-12BJ1-1526-SM-5LUAQ	Normal-Tissue(GTEx)		0.584968	GTEX-145ME-1026-SM-5O9B4	Normal-Tissue(GTEx)
														-1.57153e-08	GTEX-WHSB-0426-SM-4M1XI	Normal-Tissue(GTEx)		1.97453	TCGA-D7-8578-01	Tumor
														-1.57153e-08	GTEX-111YS-0826-SM-5GZYK	Normal-Tissue(GTEx)		3.80118	TCGA-SW-A7EB-01	Tumor
														0.26304	TCGA-IG-A3I8-01	Tumor		0.0703873	GTEX-1211K-1426-SM-5FQTF	Normal-Tissue(GTEx)
														-1.57153e-08	GTEX-12WSJ-0726-SM-5GCN6	Normal-Tissue(GTEx)		3.49569	TCGA-F1-A72C-01	Tumor
														-1.57153e-08	GTEX-13NYB-0826-SM-5MR4V	Normal-Tissue(GTEx)		-1.57153e-08	TCGA-D7-5577-01	Tumor
														-1.57153e-08	GTEX-13FTW-1926-SM-5K7Y4	Normal-Tissue(GTEx)		0.565594	GTEX-1122O-1926-SM-5EGIQ	Normal-Tissue(GTEx)
														-1.57153e-08	GTEX-111YS-1026-SM-5GZYE	Normal-Tissue(GTEx)		0.485434	TCGA-D7-6526-01	Tumor
														-1.57153e-08	GTEX-WEY5-0926-SM-4LMI4	Normal-Tissue(GTEx)		-1.57153e-08	GTEX-13O61-1126-SM-5L3FI	Normal-Tissue(GTEx)
														-1.57153e-08	GTEX-14DAQ-1626-SM-5S2R1	Normal-Tissue(GTEx)		0.839938	TCGA-BR-6453-11	Normal
														-1.57153e-08	GTEX-13PVQ-1826-SM-5L3GU	Normal-Tissue(GTEx)		1.22032	TCGA-CD-5804-01	Tumor
														-1.57153e-08	GTEX-X4LF-0826-SM-4QASC	Normal-Tissue(GTEx)		0.137501	GTEX-ZPIC-2026-SM-57WG3	Normal-Tissue(GTEx)
														-1.57153e-08	GTEX-X3Y1-1126-SM-4PQZ9	Normal-Tissue(GTEx)		2.83595	TCGA-VQ-A8PU-01	Tumor
														0.137501	GTEX-13O1R-1526-SM-5J1O7	Normal-Tissue(GTEx)		0.526084	TCGA-BR-6707-01	Tumor
														-1.57153e-08	GTEX-11LCK-1626-SM-5PNYB	Normal-Tissue(GTEx)		2.47767	TCGA-F1-6875-01	Tumor
														-1.57153e-08	GTEX-Y3IK-1326-SM-4YCD8	Normal-Tissue(GTEx)		0.839938	GTEX-Y9LG-1026-SM-5IFJN	Normal-Tissue(GTEx)
														-1.57153e-08	GTEX-OOBK-0726-SM-3LK5Q	Normal-Tissue(GTEx)		-1.57153e-08	GTEX-13O3Q-2126-SM-5KM4C	Normal-Tissue(GTEx)
														0.226513	GTEX-13OVH-1826-SM-5K7YW	Normal-Tissue(GTEx)		2.40326	TCGA-MX-A663-01	Tumor
														-1.57153e-08	GTEX-131XF-0826-SM-5GICG	Normal-Tissue(GTEx)		2.08067	TCGA-HU-8249-01	Tumor
														-1.57153e-08	GTEX-XUZC-0426-SM-4BOPE	Normal-Tissue(GTEx)		1.46467	TCGA-BR-6802-11	Normal
														-1.57153e-08	GTEX-11DXX-1226-SM-5GICD	Normal-Tissue(GTEx)		4.46536	TCGA-BR-4361-01	Tumor
														-1.57153e-08	GTEX-SNOS-0726-SM-4DM5Z	Normal-Tissue(GTEx)		0.275004	TCGA-BR-7704-11	Normal
														-1.57153e-08	GTEX-YB5E-0826-SM-4VDRZ	Normal-Tissue(GTEx)		1.12432	TCGA-RD-A7BS-01	Tumor
														1.94859	TCGA-XP-A8T6-01	Tumor		3.63688	TCGA-F1-6874-01	Tumor
														0.124327	GTEX-12696-1326-SM-5FQTJ	Normal-Tissue(GTEx)		1.09085	TCGA-CG-5720-11	Normal
														-1.57153e-08	GTEX-S4P3-0426-SM-4AD56	Normal-Tissue(GTEx)		3.72031	TCGA-VQ-A8P2-01	Tumor
														-1.57153e-08	GTEX-1399R-0826-SM-5IJEL	Normal-Tissue(GTEx)		0.238793	GTEX-PX3G-1526-SM-48U11	Normal-Tissue(GTEx)
														0.411425	TCGA-L5-A4OO-11	Normal		6.06735	TCGA-D7-A6EX-01	Tumor
														0.150557	GTEX-139YR-1826-SM-5LZXA	Normal-Tissue(GTEx)		2.97268	TCGA-BR-6709-01	Tumor
														0.495692	TCGA-LN-A49M-01	Tumor		0.613537	TCGA-HU-A4GY-11	Normal
														-1.57153e-08	GTEX-ZF2S-1126-SM-4WKHH	Normal-Tissue(GTEx)		0.903017	TCGA-HF-7134-01	Tumor
														-1.57153e-08	GTEX-S32W-1026-SM-4AD5W	Normal-Tissue(GTEx)		1.02858	TCGA-VQ-A8PM-01	Tumor
														-1.57153e-08	GTEX-13X6I-1026-SM-5LU4C	Normal-Tissue(GTEx)		0.863959	GTEX-13FTX-0726-SM-5N9BI	Normal-Tissue(GTEx)
														-1.57153e-08	GTEX-11EQ9-0726-SM-5A5K2	Normal-Tissue(GTEx)		5.80138	TCGA-CD-8535-01	Tumor
														0.176318	GTEX-S341-0426-SM-4AD5L	Normal-Tissue(GTEx)		1.71372	TCGA-HU-A4GJ-01	Tumor
														0.422222	GTEX-11VI4-0826-SM-5GU5N	Normal-Tissue(GTEx)		0.21412	GTEX-WFG7-1326-SM-4LMK1	Normal-Tissue(GTEx)
														4.84697	TCGA-L5-A4OG-01	Tumor		1.42762	TCGA-3M-AB46-01	Tumor
														0.124327	GTEX-VUSG-1226-SM-4KKZF	Normal-Tissue(GTEx)		0.238793	TCGA-FP-7829-11	Normal
														-1.57153e-08	GTEX-144GO-2726-SM-5O9A2	Normal-Tissue(GTEx)		4.64614	TCGA-BR-6566-01	Tumor
														-1.57153e-08	GTEX-Y5V5-1626-SM-4VDSG	Normal-Tissue(GTEx)		2.64151	TCGA-BR-A4CR-01	Tumor
														0.367373	TCGA-L5-A4OM-01	Tumor		-1.57153e-08	GTEX-12C56-0526-SM-5FQST	Normal-Tissue(GTEx)
														0.150557	GTEX-RTLS-1226-SM-46MUP	Normal-Tissue(GTEx)		3.03387	TCGA-R5-A7ZI-01	Tumor
														-1.57153e-08	GTEX-XQ8I-1526-SM-4BOOH	Normal-Tissue(GTEx)		2.63689	TCGA-HU-8602-01	Tumor
														0.650778	TCGA-L5-A4OP-01	Tumor		2.71807	TCGA-VQ-AA6F-01	Tumor
														0.084067	GTEX-P4QS-0626-SM-3NMD1	Normal-Tissue(GTEx)		0.0703873	TCGA-BR-8588-01	Tumor
														3.847	TCGA-IC-A6RE-01	Tumor		0.378503	TCGA-IN-AB1X-11	Normal
														0.137501	GTEX-ZDYS-0826-SM-4WWCR	Normal-Tissue(GTEx)
														1.53608	TCGA-JY-A93C-01	Tumor
														0.137501	GTEX-QDVN-1026-SM-48TZA	Normal-Tissue(GTEx)
														-1.57153e-08	GTEX-T5JC-1726-SM-4DM6U	Normal-Tissue(GTEx)
														2.75914	TCGA-2H-A9GG-01	Tumor
														0.400527	GTEX-11GSP-1726-SM-5A5LI	Normal-Tissue(GTEx)
														-1.57153e-08	GTEX-14BMU-0926-SM-5S2QB	Normal-Tissue(GTEx)
														-1.57153e-08	GTEX-ZZPT-1426-SM-5N9C5	Normal-Tissue(GTEx)
														-1.57153e-08	GTEX-PLZ5-0926-SM-3TW8L	Normal-Tissue(GTEx)
														-1.57153e-08	GTEX-1399S-1526-SM-5P9JC	Normal-Tissue(GTEx)
														-1.57153e-08	GTEX-139YR-1626-SM-5IJGK	Normal-Tissue(GTEx)
														-1.57153e-08	GTEX-X3Y1-1326-SM-4PQZB	Normal-Tissue(GTEx)
														-1.57153e-08	GTEX-13OW7-1926-SM-5LUB4	Normal-Tissue(GTEx)
														-1.57153e-08	GTEX-RM2N-0726-SM-48FD5	Normal-Tissue(GTEx)
														0.111034	GTEX-13FH7-0526-SM-5IJF8	Normal-Tissue(GTEx)
														0.250954	GTEX-N7MS-1225-SM-3LK5G	Normal-Tissue(GTEx)
														0.356135	TCGA-IG-A97H-01	Tumor
														0.163501	GTEX-YF7O-0926-SM-5IFIF	Normal-Tissue(GTEx)
														0.176318	GTEX-139UW-1126-SM-5IJEJ	Normal-Tissue(GTEx)
														-1.57153e-08	GTEX-U4B1-0826-SM-4DXTW	Normal-Tissue(GTEx)
														4.1763	TCGA-L5-A4OW-01	Tumor
														-1.57153e-08	GTEX-13D11-1926-SM-5IFGB	Normal-Tissue(GTEx)
														-1.57153e-08	GTEX-WFG7-1226-SM-4LMK2	Normal-Tissue(GTEx)
														2.95794	TCGA-2H-A9GH-01	Tumor
														-1.57153e-08	GTEX-148VJ-1026-SM-5LU98	Normal-Tissue(GTEx)
														0.111034	GTEX-11NUK-1726-SM-5A5L2	Normal-Tissue(GTEx)
														-1.57153e-08	GTEX-WFG8-1126-SM-4LVN1	Normal-Tissue(GTEx)
														2.34481	TCGA-V5-A7RE-11	Normal
														0.432948	TCGA-LN-A4A3-01	Tumor
														-1.57153e-08	GTEX-ZLV1-0526-SM-4WWD4	Normal-Tissue(GTEx)
														4.00001	TCGA-L5-A4OJ-01	Tumor
														0.163501	TCGA-L5-A88W-01	Tumor
														-1.57153e-08	GTEX-132AR-2226-SM-5J2NT	Normal-Tissue(GTEx)
														4.4542	TCGA-IC-A6RF-11	Normal
														0.443614	GTEX-Q2AI-0626-SM-48TZU	Normal-Tissue(GTEx)
														0.163501	TCGA-VR-A8EW-01	Tumor
														-1.57153e-08	GTEX-WOFM-0626-SM-4OOS3	Normal-Tissue(GTEx)
														-1.57153e-08	GTEX-11DYG-1426-SM-5A5JR	Normal-Tissue(GTEx)
														-1.57153e-08	GTEX-11P81-0826-SM-5P9GR	Normal-Tissue(GTEx)
														-1.57153e-08	GTEX-OHPM-0726-SM-3LK7A	Normal-Tissue(GTEx)
														-1.57153e-08	GTEX-13OVG-0926-SM-5J2OJ	Normal-Tissue(GTEx)
														0.422222	GTEX-WHWD-0926-SM-4OORY	Normal-Tissue(GTEx)
														-1.57153e-08	GTEX-U3ZM-0526-SM-4DXTB	Normal-Tissue(GTEx)
														0.201631	TCGA-LN-A9FP-01	Tumor
														0.505893	GTEX-N7MT-0226-SM-48TC3	Normal-Tissue(GTEx)
														-1.57153e-08	GTEX-WHSB-0526-SM-4M1XM	Normal-Tissue(GTEx)
														-1.57153e-08	GTEX-13O21-0726-SM-5L3EG	Normal-Tissue(GTEx)
														-1.57153e-08	TCGA-IC-A6RE-11	Normal
														0.887511	TCGA-IG-A51D-01	Tumor
														-1.57153e-08	GTEX-146FH-1626-SM-5NQ9H	Normal-Tissue(GTEx)
														-1.57153e-08	GTEX-WYVS-0726-SM-4ONDO	Normal-Tissue(GTEx)
														-1.57153e-08	GTEX-13G51-1026-SM-5K7YQ	Normal-Tissue(GTEx)
														-1.57153e-08	GTEX-11DXX-1026-SM-5H11E	Normal-Tissue(GTEx)
														0.084067	GTEX-13OVG-0626-SM-5IFEP	Normal-Tissue(GTEx)
														0.176318	GTEX-148VI-1226-SM-5RQJR	Normal-Tissue(GTEx)
														-1.57153e-08	GTEX-1399R-0926-SM-5J2N8	Normal-Tissue(GTEx)
														1.02858	TCGA-L5-A43E-01	Tumor
														-1.57153e-08	GTEX-XQ3S-1026-SM-4BOPJ	Normal-Tissue(GTEx)
														-1.57153e-08	GTEX-WHSE-1626-SM-4M1XL	Normal-Tissue(GTEx)
														-1.57153e-08	GTEX-ZVT2-1326-SM-5E45H	Normal-Tissue(GTEx)
														-1.57153e-08	GTEX-131XE-1226-SM-5EGKF	Normal-Tissue(GTEx)
														2.95237	TCGA-L5-A4OE-01	Tumor
														4.46594	TCGA-L5-A8NM-01	Tumor
														-1.57153e-08	GTEX-ZY6K-0826-SM-5A5L7	Normal-Tissue(GTEx)
														-1.57153e-08	GTEX-13OW6-1626-SM-5IJD5	Normal-Tissue(GTEx)
														0.411425	TCGA-L5-A4OJ-11	Normal
														0.124327	GTEX-ZYT6-1126-SM-5GZYR	Normal-Tissue(GTEx)
														-1.57153e-08	GTEX-11ZU8-1526-SM-5EGHX	Normal-Tissue(GTEx)
														0.150557	GTEX-13W3W-1826-SM-5IJDE	Normal-Tissue(GTEx)
														0.250954	TCGA-LN-A7HV-01	Tumor
														0.111034	TCGA-L5-A4OF-11	Normal
														0.163501	GTEX-1122O-1826-SM-5EGIP	Normal-Tissue(GTEx)
														-1.57153e-08	GTEX-Y5V6-1226-SM-4VDTE	Normal-Tissue(GTEx)
														0.111034	GTEX-14DAR-0726-SM-5RQIA	Normal-Tissue(GTEx)
														0.111034	TCGA-VR-A8EY-01	Tumor
														2.88943	TCGA-2H-A9GK-01	Tumor
														-1.57153e-08	GTEX-WYJK-1926-SM-4ONDP	Normal-Tissue(GTEx)
														-1.57153e-08	GTEX-S7SF-1026-SM-4AD4I	Normal-Tissue(GTEx)
														-1.57153e-08	GTEX-ZTX8-0226-SM-5E44D	Normal-Tissue(GTEx)
														2.50077	TCGA-LN-A49W-01	Tumor
														0.367373	TCGA-V5-A7RC-01	Tumor
														0.641556	TCGA-V5-A7RC-06	Tumor
														0.99279	TCGA-VR-AA4G-01	Tumor
														-1.57153e-08	GTEX-V955-1026-SM-4JBHO	Normal-Tissue(GTEx)
														-1.57153e-08	GTEX-WHPG-1226-SM-4M1ZI	Normal-Tissue(GTEx)
														0.150557	GTEX-132QS-1426-SM-5P9GE	Normal-Tissue(GTEx)
														-1.57153e-08	GTEX-ZVP2-1326-SM-57WCE	Normal-Tissue(GTEx)
														0.526084	TCGA-XP-A8T8-01	Tumor
														0.226513	TCGA-V5-AASV-01	Tumor
														-1.57153e-08	GTEX-UJHI-0926-SM-4IHKF	Normal-Tissue(GTEx)
														-1.57153e-08	GTEX-S3XE-0826-SM-4AD4U	Normal-Tissue(GTEx)
														0.400527	GTEX-Y5LM-1226-SM-4VDT6	Normal-Tissue(GTEx)
														-1.57153e-08	GTEX-12WSL-1526-SM-5GCP8	Normal-Tissue(GTEx)
														3.64617	TCGA-R6-A6DN-01	Tumor
														-1.57153e-08	GTEX-YB5E-0926-SM-4WWDQ	Normal-Tissue(GTEx)
														4.49058	TCGA-L5-A88V-01	Tumor
														0.696007	TCGA-LN-A8I1-01	Tumor
														0.59455	TCGA-LN-A4A9-01	Tumor
														-1.57153e-08	GTEX-ZTX8-0326-SM-59HLA	Normal-Tissue(GTEx)
														0.111034	GTEX-ZVZP-1626-SM-5GIDJ	Normal-Tissue(GTEx)
														1.79494	TCGA-VR-AA4D-01	Tumor
														0.856001	TCGA-L5-A893-01	Tumor
														-1.57153e-08	GTEX-13QBU-1026-SM-5LU3R	Normal-Tissue(GTEx)
														0.124327	GTEX-132QS-1626-SM-5K7YZ	Normal-Tissue(GTEx)
														0.505893	TCGA-L5-A43C-11	Normal
														-1.57153e-08	GTEX-131XG-1026-SM-5GCMX	Normal-Tissue(GTEx)
														-1.57153e-08	GTEX-13FLV-1126-SM-5J2NO	Normal-Tissue(GTEx)
														-1.57153e-08	GTEX-WFJO-0726-SM-4LVM8	Normal-Tissue(GTEx)
														-1.57153e-08	GTEX-13OW6-1426-SM-5L3EU	Normal-Tissue(GTEx)
														-1.57153e-08	GTEX-Z9EW-0626-SM-5HL95	Normal-Tissue(GTEx)
														0.189038	GTEX-132AR-2526-SM-5PNVM	Normal-Tissue(GTEx)
														-1.57153e-08	GTEX-Y5LM-1126-SM-4VDT5	Normal-Tissue(GTEx)
														0.111034	GTEX-11NUK-1426-SM-5HL68	Normal-Tissue(GTEx)
														0.111034	GTEX-ZLWG-1226-SM-4WWFS	Normal-Tissue(GTEx)
														4.56865	TCGA-2H-A9GO-01	Tumor
														-1.57153e-08	GTEX-OXRL-0726-SM-3NM9A	Normal-Tissue(GTEx)
														0.238793	GTEX-XBED-1026-SM-48TCB	Normal-Tissue(GTEx)
														0.111034	GTEX-XPVG-1326-SM-4B65P	Normal-Tissue(GTEx)
														0.367373	TCGA-LN-A4A1-01	Tumor
														1.58975	TCGA-JY-A6FG-01	Tumor
														0.443614	GTEX-P4QT-0626-SM-3NMCP	Normal-Tissue(GTEx)
														-1.57153e-08	GTEX-P4PQ-0626-SM-3NMCU	Normal-Tissue(GTEx)
														-1.57153e-08	GTEX-139T6-0826-SM-5J1O2	Normal-Tissue(GTEx)
														0.124327	GTEX-139D8-1426-SM-5IJEX	Normal-Tissue(GTEx)
														-1.57153e-08	GTEX-QEL4-1526-SM-447AB	Normal-Tissue(GTEx)
														0.124327	GTEX-11TUW-1326-SM-5EQKV	Normal-Tissue(GTEx)
														-1.57153e-08	GTEX-1399Q-1126-SM-5P9JA	Normal-Tissue(GTEx)
														4.02412	TCGA-R6-A6KZ-01	Tumor
														0.163501	GTEX-WZTO-1526-SM-4PQYQ	Normal-Tissue(GTEx)
														0.475073	GTEX-13W46-1926-SM-5J2MF	Normal-Tissue(GTEx)
														0.0565848	TCGA-IG-A97I-01	Tumor
														0.298665	GTEX-13QJ3-1726-SM-5RQK9	Normal-Tissue(GTEx)
														-1.57153e-08	GTEX-13X6J-1626-SM-5Q5CV	Normal-Tissue(GTEx)
														0.0703873	GTEX-Q2AH-0826-SM-48TZN	Normal-Tissue(GTEx)
														-1.57153e-08	GTEX-RU1J-0426-SM-46MUK	Normal-Tissue(GTEx)
														-1.57153e-08	GTEX-ZPU1-1326-SM-57WE1	Normal-Tissue(GTEx)
														-1.57153e-08	GTEX-R55C-0826-SM-48FCL	Normal-Tissue(GTEx)
														0.124327	GTEX-13CF3-1626-SM-5IFG9	Normal-Tissue(GTEx)
														0.137501	GTEX-S4P3-0526-SM-4AD58	Normal-Tissue(GTEx)
														0.084067	GTEX-OXRL-0626-SM-3NM9C	Normal-Tissue(GTEx)
														-1.57153e-08	GTEX-WFON-0926-SM-4LVMK	Normal-Tissue(GTEx)
														-1.57153e-08	GTEX-XBEW-1326-SM-4AT63	Normal-Tissue(GTEx)
														-1.57153e-08	GTEX-XQ3S-1226-SM-4BOPP	Normal-Tissue(GTEx)
														0.124327	GTEX-ZLV1-0626-SM-4WWF6	Normal-Tissue(GTEx)
														0.124327	GTEX-RUSQ-0826-SM-47JWW	Normal-Tissue(GTEx)
														-1.57153e-08	GTEX-YJ8A-1226-SM-5IFHH	Normal-Tissue(GTEx)
														0.286878	GTEX-ZPU1-1426-SM-4WWFU	Normal-Tissue(GTEx)
														-1.57153e-08	GTEX-13S86-0826-SM-5SI6J	Normal-Tissue(GTEx)
														-1.57153e-08	GTEX-U4B1-0926-SM-4DXUV	Normal-Tissue(GTEx)
														0.189038	TCGA-VR-A8EU-01	Tumor
														0.150557	GTEX-12WSD-2026-SM-5HL7D	Normal-Tissue(GTEx)
														-1.57153e-08	GTEX-WYVS-1026-SM-4SOJW	Normal-Tissue(GTEx)
														0.871834	GTEX-13O61-0926-SM-5IFFE	Normal-Tissue(GTEx)
														0.163501	TCGA-Z6-AAPN-01	Tumor
														2.81559	TCGA-IG-A7DP-01	Tumor
														0.910726	TCGA-Z6-A8JE-01	Tumor
														0.26304	GTEX-13D11-2026-SM-5IJBK	Normal-Tissue(GTEx)
														0.124327	GTEX-13FH7-0726-SM-5J2NK	Normal-Tissue(GTEx)
														-1.57153e-08	GTEX-V1D1-1126-SM-4JBHT	Normal-Tissue(GTEx)
														0.150557	GTEX-VJYA-0626-SM-4KL1S	Normal-Tissue(GTEx)
														-1.57153e-08	GTEX-XMD2-1326-SM-4YCET	Normal-Tissue(GTEx)
														-1.57153e-08	GTEX-NFK9-1126-SM-3LK78	Normal-Tissue(GTEx)
														-1.57153e-08	GTEX-12KS4-1026-SM-5FQTD	Normal-Tissue(GTEx)
														-1.57153e-08	GTEX-TML8-1426-SM-4DXUT	Normal-Tissue(GTEx)
														0.111034	GTEX-ZYW4-1326-SM-5E45N	Normal-Tissue(GTEx)
														0.250954	GTEX-11DXY-1326-SM-5987Z	Normal-Tissue(GTEx)
														-1.57153e-08	GTEX-QV44-1026-SM-447CG	Normal-Tissue(GTEx)
														0.163501	GTEX-1497J-2126-SM-5NQB8	Normal-Tissue(GTEx)
														-1.57153e-08	GTEX-X585-1426-SM-4E3JO	Normal-Tissue(GTEx)
														-1.57153e-08	GTEX-11EQ9-0826-SM-5986Y	Normal-Tissue(GTEx)
														0.26304	GTEX-QDVN-1126-SM-48TZ7	Normal-Tissue(GTEx)
														0.111034	GTEX-1497J-2726-SM-5SI9W	Normal-Tissue(GTEx)
														-1.57153e-08	GTEX-R55G-0926-SM-48FDN	Normal-Tissue(GTEx)
														-1.57153e-08	GTEX-OXRP-0926-SM-48TC1	Normal-Tissue(GTEx)
														-1.57153e-08	GTEX-WH7G-1026-SM-4LVML	Normal-Tissue(GTEx)
														0.163501	TCGA-2H-A9GJ-01	Tumor
														0.176318	GTEX-132AR-2326-SM-5IJDY	Normal-Tissue(GTEx)
														-1.57153e-08	GTEX-XUW1-1526-SM-4BOOY	Normal-Tissue(GTEx)
														1.35616	TCGA-IG-A5S3-01	Tumor
														-1.57153e-08	GTEX-RNOR-1326-SM-48FDE	Normal-Tissue(GTEx)
														2.33341	TCGA-L5-A8NI-01	Tumor
														-1.57153e-08	GTEX-ZY6K-0526-SM-5GZY9	Normal-Tissue(GTEx)
														-1.57153e-08	GTEX-145MO-1526-SM-5QGQC	Normal-Tissue(GTEx)
														-1.57153e-08	GTEX-13OW8-2226-SM-5K7Z4	Normal-Tissue(GTEx)
														2.72027	TCGA-2H-A9GM-01	Tumor
														-1.57153e-08	GTEX-12ZZY-1526-SM-5LZWF	Normal-Tissue(GTEx)
														4.54845	TCGA-IC-A6RF-01	Tumor
														-1.57153e-08	GTEX-YJ8A-1426-SM-5PNV7	Normal-Tissue(GTEx)
														0.111034	GTEX-139YR-1726-SM-5IFFK	Normal-Tissue(GTEx)
														0.0976133	GTEX-13W3W-1626-SM-5LU35	Normal-Tissue(GTEx)
														-1.57153e-08	GTEX-YEC4-1126-SM-5CVLW	Normal-Tissue(GTEx)
														-1.57153e-08	GTEX-13VXU-1126-SM-5LU3U	Normal-Tissue(GTEx)
														0.0976133	GTEX-Y8LW-0626-SM-4VDS8	Normal-Tissue(GTEx)
														-1.57153e-08	GTEX-VJYA-0726-SM-4KL1T	Normal-Tissue(GTEx)
