# Supplementary material for: CRISPR–Cas9-based functional interrogation of unconventional translatome reveals human cancer dependency on cryptic non-canonical open reading frames
Source: Nat Struct Mol Biol. 2023 Nov 6;30(12):1878–92. doi: 10.1038/s41594-023-01117-1 (PMC10716047; doi:10.1038/s41594-023-01117-1)
Supplement: Supplementary file 15 — Statistical source data. [file 41594_2023_1117_MOESM15_ESM.xlsx]

## Sheet: Sheet1
extended data Figure 2e
days	ORF-ELFN1-AS1			ORF-AC01233.4			EV
0	0.156	0.148	0.147	0.149	0.138	0.145	0.135	0.134	0.136
1	0.251	0.25	0.25	0.229	0.226	0.225	0.202	0.192	0.181
2	0.368	0.341	0.333	0.372	0.337	0.329	0.274	0.269	0.259
3	0.916	0.851	0.82	0.704	0.66	0.788	0.536	0.539	0.52
4	1.56	1.457	1.351	1.322	1.292	1.158	0.879	0.947	0.986
extended data Figure 2f
days	sgNC			sg#1(ORF-ELFN1-AS1)			sg#2(ORF-ELFN1-AS1)
0	0.141	0.142	0.143	0.129	0.132	0.133	0.124	0.128	0.128
1	0.203	0.198	0.202	0.171	0.175	0.171	0.161	0.157	0.159
2	0.296	0.303	0.298	0.215	0.228	0.229	0.183	0.19	0.202
3	0.7	0.674	0.673	0.478	0.438	0.513	0.321	0.329	0.317
4	1.025	1.077	1.072	0.722	0.709	0.716	0.502	0.456	0.523
extended data Figure 2g
days	sgNC			sg#1(ORF-AC012363.4)			sg#2(ORF-AC012363.4)
0	0.143	0.145	0.145	0.127	0.131	0.128	0.131	0.136	0.137
1	0.197	0.205	0.192	0.162	0.162	0.163	0.176	0.173	0.174
2	0.291	0.303	0.312	0.208	0.228	0.231	0.227	0.248	0.243
3	0.716	0.695	0.728	0.422	0.454	0.45	0.505	0.467	0.528
4	1.104	1.316	1.242	0.754	0.795	0.753	0.839	0.853	0.812
extended data Figure 2h
EV			ORF-ELFN1-AS1			ORF-AC01233.4
107	121	124	194	169	175	170	177	182
extended data Figure 2i
sgNC			sgORF-ELFN1-AS1#1			sgORF-ELFN1-AS1#2
134	145	116	55	86	64	64	44	81
extended data Figure 2j
sgNC			sgAC012363.4#1			sgAC012363.4#2
161	143	150	75	107	77	99	89	121
