# Supplementary material for: CRISPR–Cas9-based functional interrogation of unconventional translatome reveals human cancer dependency on cryptic non-canonical open reading frames
Source: Nat Struct Mol Biol. 2023 Nov 6;30(12):1878–92. doi: 10.1038/s41594-023-01117-1 (PMC10716047; doi:10.1038/s41594-023-01117-1)
Supplement: Supplementary file 18 — Statistical source data. [file 41594_2023_1117_MOESM18_ESM.xlsx]

## Sheet: Extended Data Figure 4
extended data Figure 4a
	CRL1831			HCT116			DLD1			HT29			SW480			RKO			LoVo			Cao2
ELFN1-AS1	25.5236	25.4277	25.4912	7.15258	7.31478	7.17752	7.45788	7.48274	7.67129	7.10703	7.24292	7.46335	8.1964	8.29725	8.27553	8.31116	8.18806	8.15873	9.68031	9.91765	9.66563	10.5803	10.4345	10.4818
extended data Figure 4c						extended data Figure 4e
	NAT(H-Score)	Tumor(H-Score)				days	sgNC					sgSMIMP#1					sgSMIMP#2
	10.2	3				0	0.222	0.239	0.245	0.23	0.214	0.205	0.232	0.245	0.246	0.208	0.222	0.24	0.247	0.246	0.209
	0	80.5				1	0.438	0.463	0.508	0.4	0.369	0.463	0.458	0.469	0.355	0.324	0.438	0.44	0.438	0.369	0.335
	0	0.9				2	0.544	0.547	0.598	0.554	0.507	0.603	0.629	0.604	0.614	0.55	0.567	0.579	0.652	0.66	0.662
	0	48.8				3	0.946	0.924	1.002	0.886	0.824	0.863	0.899	0.897	0.914	0.928	0.89	0.86	0.736	0.851	0.83
	14.9	57.4				4	1.238	1.22	1.335	1.058	1.02	1.182	1.193	1.203	1.165	1.05	1.065	1.201	1.36	1.349	1.27
	0	195.6
	0	24.2				extended data Figure 4f
	0	51.9				days	sgNC			sgSMIMP#1			sgSMIMP#2
	0	60				0	0.178	0.193	0.184	0.188	0.193	0.176	0.184	0.189	0.173
	0	94.2				1	0.273	0.285	0.29	0.231	0.222	0.235	0.218	0.222	0.227
	0	96.1				2	0.435	0.484	0.453	0.302	0.25	0.264	0.274	0.266	0.245
	0	34.4				3	0.742	0.7	0.755	0.439	0.362	0.351	0.398	0.409	0.338
	0	72				4	1.292	1.183	1.133	0.614	0.573	0.595	0.514	0.57	0.513
	0	89.8
	0	132.5				extended data Figure 4g
	0	52.7				days	sgNC				sgSMIMP#1				sgSMIMP#2
	0	96.5				0	0.187	0.186	0.19	0.185	0.175	0.178	0.196	0.176	0.168	0.17	0.229	0.209
	0	125.7				1	0.227	0.214	0.215	0.215	0.199	0.195	0.189	0.189	0.19	0.193	0.184	0.187
	0	25.6				2	0.229	0.241	0.24	0.233	0.196	0.187	0.196	0.186	0.18	0.186	0.183	0.184
	0	92.2				3	0.271	0.274	0.273	0.296	0.2	0.194	0.202	0.199	0.192	0.189	0.193	0.193
	0	89.5				4	0.336	0.336	0.327	0.366	0.214	0.216	0.22	0.221	0.215	0.217	0.214	0.212
	0	85.3				5	0.42	0.434	0.42	0.464	0.251	0.257	0.245	0.257	0.242	0.246	0.249	0.245
	0	70.3
	0	90.6				extended data Figure 4h
	0	37.5				days	sgNC				sgSMIMP#1				sgSMIMP#2
	0	74.6				0	0.163	0.159	0.16	0.159	0.16	0.155	0.158	0.155	0.156	0.153	0.159	0.152
	0	64.4				1	0.199	0.198	0.214	0.201	0.186	0.199	0.2	0.2	0.186	0.196	0.187	0.192
	0	60.6				2	0.291	0.315	0.325	0.311	0.192	0.206	0.21	0.215	0.2	0.223	0.24	0.226
	0	33.7				3	0.46	0.455	0.506	0.485	0.27	0.275	0.368	0.332	0.28	0.284	0.371	0.296
	0	30.4				4	0.657	0.721	0.758	0.743	0.544	0.515	0.544	0.496	0.495	0.544	0.591	0.534
	0	9.9
	0	23.7				extended data Figure 4i
						days	sgNC				sgSMIMP#1				sgSMIMP#2
						0	0.099	0.098	0.098	0.098	0.1	0.097	0.1	0.1	0.101	0.1	0.099	0.1
						1	0.109	0.119	0.114	0.117	0.112	0.122	0.123	0.115	0.116	0.115	0.116	0.119
						2	0.164	0.179	0.164	0.169	0.145	0.186	0.204	0.176	0.142	0.188	0.18	0.191
						3	0.295	0.317	0.29	0.321	0.26	0.277	0.279	0.29	0.267	0.28	0.283	0.259
						4	0.405	0.477	0.467	0.463	0.412	0.423	0.434	0.446	0.458	0.404	0.379	0.433
						5	0.476	0.525	0.557	0.495	0.49	0.506	0.505	0.495	0.496	0.521	0.489	0.47
						extended data Figure 4j
						days	sgNC				sgSMIMP#1				sgSMIMP#2
						0	0.38	0.401	0.408	0.384	0.369	0.408	0.369	0.359	0.393	0.362	0.387	0.36
						2	0.351	0.393	0.381	0.359	0.357	0.364	0.39	0.394	0.352	0.348	0.376	0.37
						4	0.643	0.587	0.67	0.647	0.663	0.608	0.652	0.608	0.676	0.604	0.602	0.658
						6	1.284	1.065	0.886	1.159	1.076	1.011	0.984	0.958	1.218	1.139	1.097	1.053
						8	1.987	2.337	2.136	2.006	2.306	2.05	2.023	1.91	2.298	1.816	1.602	1.798
