# Supplementary material for: CRISPR–Cas9-based functional interrogation of unconventional translatome reveals human cancer dependency on cryptic non-canonical open reading frames
Source: Nat Struct Mol Biol. 2023 Nov 6;30(12):1878–92. doi: 10.1038/s41594-023-01117-1 (PMC10716047; doi:10.1038/s41594-023-01117-1)
Supplement: Supplementary file 20 — Statistical source data. [file 41594_2023_1117_MOESM20_ESM.xlsx]

## Sheet: Extended Data Figure 5
extended data Figure 5a
days	siNC+EV			siELFN1-AS1+EV			siNC+SMIMP			siELFN1-AS1+SMIMP			siNC+SMIMP(AGG)			siELFN1-AS1+SMIMP(AGG)
0	0.136	0.13	0.129	0.12	0.119	0.118	0.131	0.128	0.131	0.122	0.12	0.12	0.134	0.128	0.13	0.121	0.115	0.117
1	0.234	0.192	0.208	0.199	0.173	0.175	0.242	0.209	0.216	0.217	0.193	0.18	0.223	0.205	0.193	0.17	0.173	0.164
2	0.373	0.456	0.465	0.231	0.179	0.207	0.445	0.535	0.507	0.318	0.371	0.363	0.389	0.408	0.374	0.202	0.218	0.195
3	0.725	0.567	0.683	0.388	0.284	0.282	0.748	0.811	0.76	0.66	0.546	0.492	0.702	0.621	0.567	0.279	0.285	0.266
4	0.982	1.089	1.019	0.6	0.406	0.423	1.403	1.327	1.359	0.834	0.935	0.899	1.1	0.978	0.982	0.452	0.443	0.44
extended data Figure 5b
siNC+EV			siELFN1-AS1+EV			siNC+SMIMP			siELFN1-AS1+SMIMP			siNC+SMIMP(AGG)			siELFN1-AS1+SMIMP(AGG)
295	296	302	142	146	146	353	362	325	282	299	273	324	329	305	136	162	165
extended data Figure 5c
days	shNC+EV								shELFN1-AS1+EV								shELFN1-AS1+SMIMP								shELFN1-AS1+SMIMP(AGG)
7	20.23	23.275	21.504	26.011	11.2995	15.376	23.328	11.76	0	12.393	6.912	10.976	12.1945	0	11.25	9.8415	13.72	12.615	28.158	16.896	26.01	13.0355	23.12	18	15.75	14.4	4.4795	0	6.912	7.8125	7.8125	13.456
11	35.7435	86.756	44.982	93.104	52.9	62.866	74.0015	45.864	24.624	25.92	15.376	15.8565	22.869	17.298	13.95	23.85	65.1655	37.926	49.923	31.046	78.4195	42.336	102.528	66.792	13.95	25.92	0	0	0	21.386	19.652	16.384
15	80	167.323	147.6	187.974	117	111.843	91.035	105.593	34.344	33.934	28.158	18.513	44.528	60.0925	36.1415	67.8375	101.4	44.528	63.7875	68.75	119.487	70.272	180.589	97.92	19.652	33.048	54.6325	35.301	14.8955	33.6	23.04	38.266
19	112.896	353.202	198.198	300.56	229.992	188.528	169.305	230.64	44.764	46.2275	38.808	23.8875	44.528	104.976	72.897	110.362	213.227	74.431	133.2	130.977	202.005	128.797	375.45	141.12	27.744	60.0925	66.1635	58.08	14.85	72.03	48.4	62.422
23	182.952	522.72	305.809	415.872	357.637	217.088	402.192	336.96	125.001	82.5	50.784	28.88	86.022	137.637	82.8375	40.572	235.224	128.774	135	158.438	279.276	211.864	492.993	225.28	54.5455	59.643	67.968	97.686	70.886	99.144	97.216	107.648
27	251.982	462.168	389.803	611.776	490.05	346.56	578.233	425.88	188.528	167.936	89.376	62.5	111.392	249.952	128.304	61.364	352.872	196.52	257.911	216.562	384.552	336.2	648.96	416	48.8	117.6	292.378	229.365	64.827	189.584	119.422	148.838
31	348.8	728.064	527.425	948.15	785.936	455.112	893.025	444.341	233.512	229.992	137.216	91.936	173.95	277.255	161.867	75.843	393.6	283.966	251.896	372.6	524.768	425.25	744.15	592.457	69.696	142.2	374.062	328.738	115.351	206.681	157.696	168.683
extended data Figure 5e
shNC+EV								shELFN1-AS1+EV								shELFN1-AS1+SMIMP								shELFN1-AS1+SMIMP(AGG)
0.933	0.831	0.65	0.818	0.649	0.565	0.374	0.32	0.365	0.21	0.111	0.127	0.131	0.085	0.066	0.051	0.589	0.608	0.483	0.467	0.385	0.444	0.37	0.246	0.385	0.3	0.166	0.166	0.107	0.121	0.071	0.056
