# Supplementary material for: CRISPR–Cas9-based functional interrogation of unconventional translatome reveals human cancer dependency on cryptic non-canonical open reading frames
Source: Nat Struct Mol Biol. 2023 Nov 6;30(12):1878–92. doi: 10.1038/s41594-023-01117-1 (PMC10716047; doi:10.1038/s41594-023-01117-1)
Supplement: Supplementary file 21 — Statistical source data. [file 41594_2023_1117_MOESM21_ESM.xlsx]

## Sheet: Extended Data Figure 6
extended data Figure 6d
Time(min.)	SMIMP-Flag			SMIMP(M)-Flag
0	0.917255	1.09991	0.982832	1.00285	1.09663	0.900522
15	0.725436	0.766837	0.647285	0.774646	0.816029	0.50881
30	0.217265	0.349979	0.242624	0.198903	0.30611	0.146933
45	0.089413	0.186184	0.237756	0.078958	0.13988	0.088678
60	0.058157	0.114723	0.116425	0.045405	0.063723	0.057144
75	0.041719	0.110428	0.059811	0.046526	0.035736	0.025598
90	0.047465	0.102131	0.071899	0.041954	0.034775	0.043961
