# Supplementary material for: CRISPR–Cas9-based functional interrogation of unconventional translatome reveals human cancer dependency on cryptic non-canonical open reading frames
Source: Nat Struct Mol Biol. 2023 Nov 6;30(12):1878–92. doi: 10.1038/s41594-023-01117-1 (PMC10716047; doi:10.1038/s41594-023-01117-1)
Supplement: Supplementary file 23 — Statistical source data. [file 41594_2023_1117_MOESM23_ESM.xlsx]

## Sheet: Extended data Figure 7
extended data Figure 7a
days	siNC+EV			siELFN1-AS1+EV			siELFN1-AS1+SMC1A			siELFN1-AS1+SMIMP			siELFN1-AS1+SMIMP(M)
0	0.185	0.184	0.184	0.175	0.173	0.179	0.18	0.179	0.182	0.178	0.182	0.185	0.174	0.176	0.175
1	0.257	0.242	0.261	0.2	0.208	0.217	0.266	0.254	0.278	0.243	0.255	0.265	0.222	0.224	0.24
2	0.388	0.345	0.403	0.263	0.259	0.269	0.366	0.375	0.394	0.301	0.339	0.379	0.272	0.277	0.304
3	0.847	0.827	0.901	0.483	0.491	0.505	0.805	0.811	0.921	0.711	0.774	0.858	0.472	0.588	0.622
4	1.604	1.535	1.792	0.809	0.829	0.935	1.524	1.581	1.621	1.301	1.335	1.421	0.901	0.997	1.007
extended data Figure 7b
days	siNC+EV			siELFN1-AS1+EV			siELFN1-AS1+SMC1A			siELFN1-AS1+SMIMP			siELFN1-AS1+SMIMP(M)
0	0.166	0.159	0.154	0.164	0.162	0.156	0.156	0.162	0.159	0.152	0.16	0.157	0.158	0.156	0.157
1	0.242	0.251	0.278	0.2	0.207	0.232	0.262	0.274	0.271	0.235	0.244	0.235	0.203	0.215	0.218
2	0.366	0.372	0.399	0.261	0.233	0.229	0.389	0.401	0.399	0.324	0.35	0.344	0.238	0.229	0.222
3	0.783	0.778	0.945	0.462	0.399	0.488	0.702	0.855	0.82	0.601	0.762	0.721	0.489	0.494	0.479
4	1.671	1.488	1.703	0.784	0.702	0.801	1.411	1.623	1.545	1.301	1.499	1.325	0.705	0.784	0.899
extended data Figure 7d
HCT-116
siNC+EV				siELFN1-AS1+EV				siELFN1-AS1+SMC1A				siELFN1-AS1+SMIMP				siELFN1-AS1+SMIMP(M)
59	66	78	66	41	26	31	27	61	57	52	63	37	64	59	49	31	43	21	38
extended data Figure 7e
DLD-1
siNC+EV			siELFN1-AS1+EV			siELFN1-AS1+SMC1A			siELFN1-AS1+SMIMP			siELFN1-AS1+SMIMP(M)
101	96	87	37	32	44	80	93	94	71	88	74	44	38	46
extended data Figure 7f
days	EV+siNC			SMIMP+siNC			EV+siSMC1A			SMIMP+siSMC1A			SMIMP(M)+siNC			SMIMP(M)+siSMC1A
0	0.199	0.197	0.213	0.185	0.186	0.185	0.168	0.17	0.161	0.175	0.176	0.175	0.189	0.195	0.199	0.177	0.172	0.174
1	0.248	0.236	0.25	0.299	0.281	0.292	0.214	0.223	0.217	0.229	0.207	0.237	0.236	0.245	0.246	0.224	0.221	0.219
2	0.401	0.399	0.385	0.485	0.487	0.467	0.299	0.302	0.309	0.354	0.318	0.322	0.422	0.409	0.405	0.305	0.301	0.315
3	0.699	0.704	0.713	1.066	0.977	1.098	0.413	0.456	0.437	0.625	0.619	0.61	0.782	0.709	0.71	0.454	0.448	0.436
4	1.255	1.278	1.168	1.571	1.596	1.658	0.756	0.778	0.795	1.079	0.981	0.997	1.205	1.378	1.211	0.878	0.79	0.801
extended data Figure 7g
days	EV+siNC			SMIMP+siNC			EV+siSMC1A			SMIMP+siSMC1A			SMIMP(M)+siNC			SMIMP(M)+siSMC1A
0	0.137	0.133	0.135	0.139	0.14	0.141	0.139	0.137	0.135	0.132	0.133	0.135	0.134	0.133	0.132	0.133	0.134	0.137
1	0.198	0.197	0.201	0.222	0.233	0.237	0.189	0.189	0.185	0.182	0.183	0.181	0.201	0.198	0.195	0.199	0.197	0.195
2	0.264	0.274	0.26	0.359	0.355	0.347	0.212	0.202	0.199	0.208	0.223	0.223	0.288	0.267	0.265	0.205	0.202	0.207
3	0.563	0.543	0.533	0.708	0.796	0.799	0.304	0.31	0.298	0.405	0.462	0.439	0.594	0.585	0.584	0.316	0.306	0.358
4	0.999	0.908	0.926	1.268	1.295	1.354	0.522	0.599	0.501	0.791	0.725	0.759	1.099	1.097	0.986	0.622	0.579	0.58
extended data Figure 7h
siNC+EV			siSMC1A+EV			siNC+SMIMP			siSMC1A+SMIMP			siNC+SMIMP(M)			siSMC1A+SMIMP(M)
137	120	111	25	37	39	167	144	150	114	112	95	120	101	134	45	43	25
extended data Figure 7i
siNC+EV			siSMC1A+EV			siNC+SMIMP			siSMC1A+SMIMP			siNC+SMIMP(M)			siSMC1A+SMIMP(M)
140	149	152	47	61	51	170	182	189	142	126	124	153	134	152	65	63	60
