# Supplementary material for: CRISPR–Cas9-based functional interrogation of unconventional translatome reveals human cancer dependency on cryptic non-canonical open reading frames
Source: Nat Struct Mol Biol. 2023 Nov 6;30(12):1878–92. doi: 10.1038/s41594-023-01117-1 (PMC10716047; doi:10.1038/s41594-023-01117-1)
Supplement: Supplementary file 24 — Statistical source data. [file 41594_2023_1117_MOESM24_ESM.xlsx]

## Sheet: Extended Data Figure 8
extended data Figure 8c
	sgNC			sg#1			sg#2
CDKN1A	1.09	0.89	1.03	2.45	2.37	2.42	2.57	2.74	2.81
CDKN2B	0.94	0.96	1.11	1.48	2.03	2.07	2.05	1.88	2.14
extended data Figure 8d
	shNC			shSMC1A#1			shSMC1A#2
CDKN1A	0.916534	1.00523	1.08539	3.63524	4.46029	3.73514	4.02871	3.48928	3.84829
CDKN2B	0.76	1.04	1.27	1.64	2.46	2.34	2.71	1.74	2.78
SMC1A	0.908391	1.02791	1.07096	0.147365	0.181704	0.15072	0.216209	0.164523	0.157227
extended data Figure 8e
	siNC+EV			siNC+SMIMP			siNC+SMIMP(M)			siSMC1A+EV			siSMC1A+SMIMP			siSMC1A+SMIMP(M)
CDKN1A	0.95	1.01	1.04	0.41	0.49	0.5	0.73	1	0.97	2.49	3.3	3.32	1.49	1.72	1.67	2.37	2.76	2.47
CDKN2B	1.03	0.89	1.09	0.51	0.47	0.45	1.06	1.08	1.19	2.09	2.04	2.53	0.99	1.26	0.95	2.23	2.08	2.28
extended data Figure 8f
	IP anti-SMC1A			IP IgG
CDKN1A	0.055386	0.055995	0.05682	0.001331	0.000251	0.000929
CDKN2B	0.109109	0.109693	0.105999	0.000729	0.001287	0.000524
extended data Figure 8g
	IP anti-Flag			IP IgG
CDKN1A	0.019018	0.019806	0.019773	0.000648	0.000601	0.002336
CDKN2B	0.029647	0.028431	0.038115	0.001781	0.001141	0.003951
extended data Figure 8h
	sgNC IP			sgNC IgG			sgSMIMP#1 IP			sgSMIMP#1 IgG			sgSMIMP#2 IP			sgSMIMP#2 IgG
CDKN1A	0.052733	0.049897	0.056647	0.0004	0.001361	0.001791	0.026331	0.020785	0.025201	0.001826	0.001181	0.002135	0.024981	0.02227	0.017704	0.000179	0.001405	0.00126
CDKN2B	0.073858	0.09011	0.093125	0.000925	0.000117	0.000559	0.042691	0.046721	0.041088	0.0009	0.001302	0.000869	0.035962	0.030433	0.034764	0.001612	0.000956	0.000809
extended data Figure 8i
	siNC+EV			siNC+SMIMP			siNC+SMIMP(M)			siELFN1-AS1+EV			siELFN1-AS1+SMIMP			siELFN1-AS1+SMIMP(M)
CDKN1A	0.055481	0.050375	0.058964	0.090988	0.093108	0.09808	0.053981	0.066649	0.067134	0.014573	0.015819	0.017951	0.0692	0.065827	0.06309	0.016883	0.012793	0.016599
CDKN2B	0.127377	0.124913	0.133417	0.225611	0.237082	0.272261	0.151905	0.161525	0.186702	0.057169	0.069736	0.073524	0.142589	0.133722	0.160013	0.074741	0.076336	0.079829
