# Supplementary material for: CRISPR–Cas9-based functional interrogation of unconventional translatome reveals human cancer dependency on cryptic non-canonical open reading frames
Source: Nat Struct Mol Biol. 2023 Nov 6;30(12):1878–92. doi: 10.1038/s41594-023-01117-1 (PMC10716047; doi:10.1038/s41594-023-01117-1)
Supplement: Supplementary file 25 — Statistical source data. [file 41594_2023_1117_MOESM25_ESM.xlsx]

## Sheet: Extended Data Figure 9
extended data Figure 9a															extended data Figure 9c
	sgNC(H3K27me3)			sgSMIMP(H3K27me3)			sgNC(IgG)			sgSMIMP(IgG)						sgNC(H3K27me3)			sgSMCIP(H3K27me3)			sgNC(IgG)			sgSMIMP(IgG)
CDKN1A	0.017967	0.018364	0.021785	0.011253	0.013473	0.010681	0.000225	0.000114	0.000227	0.000112	0.000159	7.97e-05			CDKN1A	0.03451	0.044854	0.037201	0.02042	0.018556	0.027371	0.001654	0.001882	0.001238	0.001043	0.002101	0.001078
CDKN2B	0.003698	0.00377	0.004854	0.00118	0.000955	0.000528	0.00028	0.000405	0.000195	0.000283	0.000298	0.000117			CDKN2B	0.023043	0.019227	0.02761	0.014794	0.011961	0.009905	0.001293	0.001278	0.000136	0.00115	0.000607	0.000871
extended data Figure 9b															extended data Figure 9d
	shNC(H3K27me3)			shSMC1A(H3K27me3)			shNC(IgG)			shSMC1A(IgG)						shNC(H3K27me3)			shSMC1A(H3K27me3)			shNC(IgG)			shSMC1A(IgG)
CDKN1A	0.076671	0.065436	0.075628	0.039969	0.032943	0.038074	0.002014	0.001892	0.002452	0.000526	0.004283	0.003474			CDKN1A	0.02086	0.02495	0.025363	0.017395	0.010285	0.009229	0.000997	0.000924	0.001573	0.001934	0.001093	0.00202
CDKN2B	0.017769	0.024466	0.021899	0.010142	0.002736	0.004766	0.006563	0.001917	0.003488	0.004258	0.002162	0.003342			CDKN2B	0.013808	0.01311	0.0166	0.005028	0.005386	0.001148	0.002226	0.002426	0.005933	0.004566	0.004184	0.001323
extended data Figure 9e															extended data Figure 9g
	sgNC(H3K27ac)			sgSMIMP(H3K27ac)			sgNC(IgG)			sgSMMIMP(IgG)						sgNC(H3K27ac)			sgSMIMP(H3K27ac)			sgNC(IgG)			sgSMIMP(IgG)
CDKN1A	0.27656	0.343777	0.328219	0.36379	0.377295	0.448855	0.000225	0.000114	0.000227	0.000112	0.000159	7.97e-05			CDKN1A	2.9841	2.97528	4.76286	4.78548	5.51585	6.10606	0.001654	0.001882	0.001238	0.001043	0.002101	0.001078
CDKN2B	0.12086	0.120006	0.151147	0.149923	0.138909	0.149806	0.00028	0.000405	0.000195	0.000283	0.000298	0.000117			CDKN2B	0.528823	0.906877	0.444721	1.14578	0.687219	2.21521	0.001293	0.001278	0.000136	0.00115	0.000607	0.000871
extended data Figure 9f															extended data Figure 9h
	shNC(H3K27ac)			shSMC1A(H3K27ac)			shNC(IgG)			shSMC1A(IgG)						shNC(H3K27ac)			shSMC1A(H3K27ac)			shNC(IgG)			shSMC1A(IgG)
CDKN1A	1.42043	1.56986	1.2023	1.26006	1.41759	1.40541	0.002014	0.001892	0.002452	0.000526	0.004283	0.003474			CDKN1A	4.95805	5.34217	5.82296	6.82981	6.53357	6.84148	0.000997	0.000924	0.001573	0.001934	0.001093	0.00202
CDKN2B	0.648025	0.741881	0.776229	0.697122	0.906717	0.896207	0.006563	0.001917	0.003488	0.004258	0.002162	0.003342			CDKN2B	1.06319	1.2053	1.28476	1.31085	1.26204	1.22107	0.002226	0.002426	0.005933	0.004566	0.004184	0.001323
