# Supplementary material for: CRISPR–Cas9-based functional interrogation of unconventional translatome reveals human cancer dependency on cryptic non-canonical open reading frames
Source: Nat Struct Mol Biol. 2023 Nov 6;30(12):1878–92. doi: 10.1038/s41594-023-01117-1 (PMC10716047; doi:10.1038/s41594-023-01117-1)
Supplement: Supplementary file 26 — Statistical source data. [file 41594_2023_1117_MOESM26_ESM.xlsx]

## Sheet: Extended Data Figure 10
extended data Figure 10b
days	sgNC			sgSMIMP#1			sgSMIMP#2
0	0.141	0.14	0.138	0.14	0.136	0.14	0.15	0.146	0.147
1	0.436	0.405	0.417	0.363	0.347	0.351	0.417	0.403	0.388
2	0.638	0.585	0.573	0.459	0.414	0.424	0.445	0.504	0.488
3	0.994	1.041	1.049	0.592	0.617	0.609	0.556	0.583	0.717
4	1.169	1.088	1.179	0.322	0.318	0.333	0.405	0.417	0.438
extended data Figure 10c
sgNC			sgSMIMP#1			sgSMIMP#2
155	182	172	21	17	21	25	17	19
extended data Figure 10e
days	sgNC			sgSMIMP#1			sgSMIMP#2
0	0.211	0.209	0.211	0.219	0.221	0.214	0.222	0.221	0.224
1	0.289	0.293	0.296	0.231	0.231	0.237	0.247	0.257	0.259
2	0.415	0.441	0.362	0.258	0.291	0.255	0.261	0.254	0.276
3	0.635	0.606	0.596	0.348	0.325	0.314	0.34	0.341	0.353
4	0.851	0.84	0.885	0.448	0.425	0.414	0.44	0.441	0.453
extended data Figure 10f
sgNC			sgSMIMP#1			sgSMIMP#2
425	309	292	142	130	110	144	131	128
extended data Figure 10h
days	sgNC			sgSMIMP#1			sgSMIMP#2
0	0.166	0.153	0.152	0.156	0.145	0.143	0.146	0.14	0.142
1	0.316	0.292	0.277	0.331	0.292	0.281	0.326	0.306	0.262
2	0.48	0.446	0.476	0.426	0.384	0.409	0.4	0.351	0.312
3	0.674	0.732	0.74	0.54	0.556	0.553	0.634	0.542	0.433
4	1.092	1.062	0.984	0.733	0.693	0.645	0.697	0.719	0.65
extended data Figure 10i
sgNC				sgSMIMP#1				sgSMIMP#2
195	182	214	200	112	114	138	110	96	101	114	114
